# Supplementary material for: QSAR models for the ozonation of diverse volatile organic compounds at different temperatures
Source: Royal Society of Chemistry journal article supplement (doi:10.1039/d3ra08805g), 2024-01-01
Supplement: d3ra08805g1.pdf [file d3ra08805g1.pdf]

**Table S1.** The name, reaction temperature (K), quasi-SMILES, the set (active training (+), passive training set (-), calibration set (#), validation set (\*)), experimental logK<sub>O3</sub>, and predicted logK<sub>O3</sub> of VOCs of Split #1 based on TF2

| No. | Name                               | T (K) | Quasi-SMILES                          | Set | logK <sub>O3</sub> |        |
|-----|------------------------------------|-------|---------------------------------------|-----|--------------------|--------|
|     |                                    |       |                                       |     | Exp.               | Prd.   |
| 1   | alpha-phellandrene                 | 295   | <chem>CC(C)C1CC=C(C)C=C1[T24]</chem>  | +   | -13.92             | -13.93 |
| 2   | bicyclo[2.2.1]-25-heptadiene       | 297   | <chem>C1C2C=CC1C=C2[T24]</chem>       | #   | -14.33             | -14.97 |
| 3   | bicyclo[2.2.1]-2-heptene           | 297   | <chem>C1CC2CC1C=C2[T24]</chem>        | *   | -14.67             | -14.79 |
| 4   | 3,7-dimethyl-1,3,6-octatriene      | 298   | <chem>CC(C)=CCC=C(C)C=C[T24]</chem>   | *   | -14.70             | -14.80 |
| 5   | 1,3-cyclohexadiene                 | 297   | <chem>C1CC=CC=C1[T24]</chem>          | +   | -14.71             | -15.06 |
| 6   | 2,3-dimethyl-2-butene              | 363   | <chem>CC(C)=C(C)C[T37]</chem>         | +   | -14.85             | -14.71 |
| 7   | 3-methylene-7-methyl-1,6-octadiene | 295   | <chem>CC(C)=CCCC(=C)C=C[T24]</chem>   | #   | -14.90             | -14.60 |
| 8   | 2,3-dimethyl-2-butene              | 298   | <chem>CC(C)=C(C)C[T24]</chem>         | *   | -14.98             | -14.92 |
| 9   | cyclopentene                       | 294   | <chem>C1CC=CC1[T24]</chem>            | #   | -15.01             | -15.70 |
| 10  | 2,3-dimethyl-2-butene              | 227   | <chem>CC(=C(C)C)C[T10]</chem>         | #   | -15.05             | -15.54 |
| 11  | 2,3-dimethyl-2-butene              | 247   | <chem>CC(C)=C(C)C[T13]</chem>         | +   | -15.08             | -15.36 |
| 12  | 2,3-dimethyl-2-butene              | 284   | <chem>CC(C)=C(C)C[T22]</chem>         | -   | -15.08             | -15.05 |
| 13  | cyclopentene                       | 299   | <chem>C1CC=CC1[T25]</chem>            | *   | -15.09             | -15.51 |
| 14  | 1-Methyl-1-cyclopentene            | 298   | <chem>CC1=CCCC1[T24]</chem>           | -   | -15.17             | -15.32 |
| 15  | d-limonene                         | 295   | <chem>CC(=C)C1CCC(=CC1)C[T24]</chem>  | +   | -15.19             | -15.20 |
| 16  | Dihydromyrcene                     | 298   | <chem>CC(CCC=C(C)C)C=C[T24]</chem>    | #   | -15.20             | -14.54 |
| 17  | trans-3-methyl-2-pentene           | 299   | <chem>C\C(C)=C\C[T25]</chem>          | -   | -15.25             | -15.41 |
| 18  | carvomenthene                      | 295   | <chem>CC(C)C1CCC(=CC1)C[T24]</chem>   | *   | -15.28             | -15.82 |
| 19  | cis-3-methyl-2-pentene             | 299   | <chem>CC\C(C)=C/C[T25]</chem>         | +   | -15.34             | -15.71 |
| 20  | linalool                           | 298   | <chem>CC(C)=CCCC(C)(O)C=C[T24]</chem> | -   | -15.37             | -15.62 |
| 21  | 2-methyl-2-butene                  | 298   | <chem>CC=C(C)C[T24]</chem>            | +   | -15.40             | -15.46 |
| 22  | 6-methyl-5-hepten-2-one            | 298   | <chem>CC(C)=CCCC(C)=O[T24]</chem>     | -   | -15.41             | -15.50 |
| 23  | (Z,Z)-2,4-hexadiene                | 298   | <chem>C\C=C/C=C\C[T24]</chem>         | #   | -15.43             | -15.18 |
| 24  | trans-2,trans-4-hexadiene          | 294   | <chem>C\C=C/C=C/C[T24]</chem>         | *   | -15.43             | -15.48 |
| 25  | 2-methyl-2-butene                  | 284   | <chem>CC=C(C)C[T22]</chem>            | #   | -15.48             | -15.58 |
| 26  | cis-2,trans-4-hexadiene            | 294   | <chem>C\C=C/C=C/C[T24]</chem>         | -   | -15.50             | -15.48 |
| 27  | cycloheptene                       | 297   | <chem>C1CCC=CCC1[T24]</chem>          | *   | -15.50             | -14.75 |
| 28  | trans-2-pentene                    | 296   | <chem>CC/C=C/C[T24]</chem>            | *   | -15.50             | -16.14 |
| 29  | cis-2-butene                       | 364   | <chem>C\C=C/C[T37]</chem>             | -   | -15.56             | -15.87 |
| 30  | trans-2-butene                     | 336   | <chem>C\C=C\C[T31]</chem>             | *   | -15.56             | -16.33 |
| 31  | trans-2-butene                     | 298   | <chem>C\C=C\C[T24]</chem>             | #   | -15.59             | -15.78 |
| 32  | 2-buten-1-ol                       | 289   | <chem>CC=CCO[T22]</chem>              | #   | -15.60             | -16.01 |
| 33  | 1,2-Dimethylcyclohexene            | 298   | <chem>CC1=C(C)CCCC1[T24]</chem>       | *   | -15.68             | -15.27 |
| 34  | cis-2-pentene                      | 296   | <chem>CC\C=C/C[T24]</chem>            | *   | -15.68             | -15.92 |
| 35  | cyclohexene                        | 294   | <chem>C1CCC=CC1[T24]</chem>           | #   | -15.69             | -15.72 |
| 36  | trans-2-butene                     | 309   | <chem>C\C=C\C[T27]</chem>             | *   | -15.69             | -15.56 |

|    |                              |       |                         |   |        |        |
|----|------------------------------|-------|-------------------------|---|--------|--------|
| 37 | 2-methyl-2-butene            | 227   | CC=C(C)C[T10]           | * | -15.71 | -16.07 |
| 38 | trans-2-butene               | 314   | C\C=C\C[T28]            | * | -15.71 | -16.33 |
| 39 | beta-phellandrene            | 295   | CC(C)C1CCC(=C)C=C1[T24] | - | -15.75 | -15.88 |
| 40 | 1-methyl-1-cyclohexene       | 298   | CC1=CCCCC1[T24]         | # | -15.78 | -15.33 |
| 41 | trans-3-hexene               | 298   | CC\C=C\CC[T24]          | # | -15.80 | -15.75 |
| 42 | 1,3-cycloheptadiene          | 294   | C1CC=CC=CC1[T24]        | - | -15.81 | -15.74 |
| 43 | ethyl vinyl ether            | 298   | CCOC=C[T24]             | - | -15.81 | -15.99 |
| 44 | 4-acetyl-1-methylcyclohexene | 298   | CC(=O)C1CCC(=CC1)C[T24] | + | -15.82 | -15.88 |
| 45 | 2,4,4-trimethyl-2-pentene    | 298   | CC(C)=CC(C)(C)C[T24]    | + | -15.85 | -16.09 |
| 46 | cis-3-hexene                 | 293.3 | CC\C=C/CC[T24]          | * | -15.85 | -15.97 |
| 47 | cis-2-butene                 | 297   | C\C=C/C[T24]            | * | -15.86 | -16.08 |
| 48 | cis-2-butene                 | 309   | C\C=C/C[T27]            | * | -15.86 | -15.86 |
| 49 | cis-2-butene                 | 297   | C\C=C/C[T24]            | # | -15.86 | -16.08 |
| 50 | cis-2-butene                 | 309   | C\C=C/C[T27]            | + | -15.86 | -15.86 |
| 51 | cis-2-butene                 | 314   | C\C=C/C[T28]            | * | -15.87 | -16.63 |
| 52 | trans-4-octene               | 298   | CCC\C=C\CCC[T24]        | # | -15.88 | -15.79 |
| 53 | cis-2-butene                 | 298   | C\C=C/C[T24]            | + | -15.90 | -16.08 |
| 54 | trans-3-hexene               | 286.5 | CC\C=C\CC[T22]          | - | -15.91 | -15.94 |
| 55 | cis-5-decene                 | 298   | CCCC\C=C/CCCC[T24]      | * | -15.94 | -16.28 |
| 56 | trans-2-butene               | 264   | C\C=C\C[T18]            | - | -15.94 | -15.99 |
| 57 | trans-2-butene               | 277   | C\C=C\C[T19]            | + | -15.94 | -15.95 |
| 58 | trans-2-butene               | 264   | C\C=C\C[T18]            | # | -15.94 | -15.99 |
| 59 | trans-2-butene               | 277   | C\C=C\C[T19]            | # | -15.94 | -15.95 |
| 60 | cyclohexene                  | 297   | C1CCC=CC1[T24]          | * | -15.98 | -15.72 |
| 61 | trans-4-octene               | 290   | CCC\C=C\CCC[T22]        | + | -16.00 | -15.85 |
| 62 | trans-2-butene               | 251   | C\C=C\C[T14]            | - | -16.03 | -16.33 |
| 63 | 2-heptene                    | 298   | CCCCCC=CC[T24]          | - | -16.06 | -16.33 |
| 64 | cis-2-butene                 | 264   | C\C=C/C[T18]            | * | -16.06 | -16.29 |
| 65 | cis-2-butene                 | 277   | C\C=C/C[T19]            | - | -16.06 | -16.25 |
| 66 | 4-Methyl-1-cyclohexene       | 298   | CC1CCC=CC1[T24]         | + | -16.09 | -15.87 |
| 67 | 1,3-pentadiene, 2-methyl     | 298   | C\C=C\C(=C)C[T24]       | + | -16.10 | -15.58 |
| 68 | 2,4-Dimethyl-1,3-butadiene   | 298   | CC=CC(C)=C[T24]         | * | -16.10 | -16.23 |
| 69 | 1,4-cyclohexadiene           | 297   | C1C=CCC=C1[T24]         | + | -16.19 | -16.34 |
| 70 | trans-2-butene               | 225   | C\C=C\C[T10]            | # | -16.22 | -16.40 |
| 71 | trans-2-butene               | 227   | C\C=C\C[T10]            | + | -16.23 | -16.40 |
| 72 | 1,3,5-cycloheptatriene       | 294   | C1C=CC=CC=C1[T24]       | # | -16.27 | -15.99 |
| 73 | cis-2-butene                 | 238   | C\C=C/C[T12]            | * | -16.28 | -16.63 |
| 74 | cis-2-butene                 | 255   | C\C=C/C[T15]            | - | -16.31 | -16.63 |
| 75 | cis-2-butene                 | 227   | C\C=C/C[T10]            | - | -16.33 | -16.70 |
| 76 | (E)-1,3-pentadiene           | 298   | C/C=C/C=C[T24]          | + | -16.37 | -16.28 |
| 77 | trans-2,2-dimethyl-3-hexene  | 295.5 | CC/C=C/C(C)(C)C[T24]    | * | -16.39 | -16.38 |

|     |                             |       |                          |   |        |        |
|-----|-----------------------------|-------|--------------------------|---|--------|--------|
| 78  | trans-2,5-dimethyl-3-hexene | 291   | CC(C)\C=C\C(C)C[T22]     | # | -16.41 | -16.77 |
| 79  | propene                     | 362   | CC=C[T36]                | * | -16.42 | -17.19 |
| 80  | trans-2,5-dimethyl-3-hexene | 298   | CC(C)\C=C\C(C)C[T24]     | # | -16.42 | -16.47 |
| 81  | beta-pinene                 | 295   | CC1(C)C2CCC(=C)C1C2[T24] | * | -16.44 | -16.69 |
| 82  | trans-2,2-dimethyl-3-hexene | 294   | CC/C=C/C(C)(C)C[T24]     | + | -16.44 | -16.38 |
| 83  | styrene                     | 303   | C=Cc1ccccc1[T26]         | + | -16.52 | -16.71 |
| 84  | 1-butene                    | 363   | CCC=C[T37]               | - | -16.55 | -16.63 |
| 85  | 1,3,5-hexatriene            | 294   | C=CC=CC=C[T24]           | + | -16.58 | -16.68 |
| 86  | 2,3-dimethyl-1,3-butadiene  | 298   | CC(=C)C(C)=C[T24]        | * | -16.58 | -15.85 |
| 87  | trans-2-hexenyl acetate     | 288.4 | CCC/C=C/COC(C)=O[T22]    | + | -16.61 | -16.56 |
| 88  | 3-penten-2-one              | 296   | CC=CC(C)=O[T24]          | # | -16.67 | -17.08 |
| 89  | styrene                     | 296   | C=Cc1ccccc1[T24]         | * | -16.67 | -16.83 |
| 90  | beta-pinene                 | 296   | CC1(C)C2CCC(=C)C1C2[T24] | + | -16.68 | -16.69 |
| 91  | 1-penten-3-ol               | 289   | CCC(O)C=C[T22]           | * | -16.75 | -16.78 |
| 92  | 2-methyl-1,3-butadiene      | 323   | CC(=C)C=C[T29]           | # | -16.75 | -17.80 |
| 93  | 1-heptene                   | 296   | CCCCC=C[T24]             | + | -16.76 | -17.00 |
| 94  | 2-methyl-1-pentene          | 296   | CCCC(C)=C[T24]           | * | -16.77 | -17.02 |
| 95  | 1-buten-3-ol                | 298   | CC(O)C=C[T24]            | + | -16.79 | -16.70 |
| 96  | 2,5-dihydrofuran            | 294   | C1OCC=C1[T24]            | # | -16.79 | -16.73 |
| 97  | 2-methyl-1-butene           | 298   | CCC(C)=C[T24]            | + | -16.80 | -16.53 |
| 98  | pyrrole                     | 295   | [nH]1cccc1[T24]          | - | -16.80 | -17.11 |
| 99  | 2-methylpropene             | 295   | CC(C)=C[T24]             | # | -16.84 | -17.02 |
| 100 | 2-vinyl pyridine            | 298   | C=Cc1ccccn1[T24]         | - | -16.84 | -16.92 |
| 101 | 2,5-dimethyl-1,5-hexadiene  | 298   | CC(=C)CCC(C)=C[T24]      | # | -16.85 | -16.16 |
| 102 | isoprene                    | 298   | CC(=C)C=C[T24]           | + | -16.85 | -17.25 |
| 103 | propene                     | 309   | CC=C[T27]                | # | -16.85 | -17.02 |
| 104 | 1-butene                    | 314   | CCC=C[T28]               | * | -16.86 | -17.38 |
| 105 | 2-ethyl-1-butene            | 287   | CCC(=C)CC[T22]           | * | -16.86 | -18.03 |
| 106 | 2-methylpropene             | 299   | CC(C)=C[T25]             | * | -16.87 | -16.82 |
| 107 | 2-methyl-1,4-pentadiene     | 298   | CC(=C)CC=C[T24]          | - | -16.89 | -17.24 |
| 108 | propene                     | 299   | CC=C[T25]                | * | -16.89 | -17.05 |
| 109 | 1-octene                    | 298   | CCCCCCC=C[T24]           | + | -16.90 | -17.12 |
| 110 | 2-methyl-1,3-butadiene      | 295   | CC(=C)C=C[T24]           | - | -16.90 | -17.25 |
| 111 | 2-methyl-1-pentene          | 287   | CCCC(C)=C[T22]           | - | -16.90 | -17.33 |
| 112 | propene                     | 294   | CC=C[T24]                | * | -16.90 | -17.24 |
| 113 | propene                     | 298   | CC=C[T24]                | # | -16.90 | -17.24 |
| 114 | tetramethylhydrazine        | 296   | CN(C)N(C)C[T24]          | - | -16.90 | -17.10 |
| 115 | 1-butene                    | 299   | CCC=C[T25]               | # | -16.91 | -16.64 |
| 116 | 2-methylpropene             | 294   | CC(C)=C[T24]             | + | -16.92 | -17.02 |
| 117 | 1-hexene                    | 303   | CCCCC=C[T26]             | + | -16.95 | -16.76 |
| 118 | 1-hexene                    | 299   | CCCCC=C[T25]             | # | -16.96 | -16.68 |

|     |                               |     |                      |   |        |        |
|-----|-------------------------------|-----|----------------------|---|--------|--------|
| 119 | 3-methyl-1-butene             | 298 | CC(C)C=C[T24]        | - | -16.96 | -16.94 |
| 120 | 1-hexene                      | 294 | CCCCC=C[T24]         | + | -16.97 | -16.88 |
| 121 | 1-pentene                     | 299 | CCCC=C[T25]          | * | -16.97 | -16.53 |
| 122 | 4-methyl-1-pentene            | 296 | CC(C)CC=C[T24]       | - | -16.98 | -17.31 |
| 123 | propene                       | 296 | CC=C[T24]            | # | -16.98 | -17.24 |
| 124 | 1-butene                      | 303 | CCC=C[T26]           | + | -16.99 | -16.72 |
| 125 | 2,3-dimethyl-1-butene         | 285 | CC(C)C(C)=C[T22]     | * | -17.00 | -16.60 |
| 126 | 2-methyl-3-buten-2-ol         | 298 | CC(C)(O)C=C[T24]     | + | -17.00 | -16.85 |
| 127 | 1-hexene                      | 287 | CCCCC=C[T22]         | * | -17.01 | -16.81 |
| 128 | trimethylamine                | 296 | CN(C)C[T24]          | - | -17.01 | -17.13 |
| 129 | 1-heptene                     | 287 | CCCCCC=C[T22]        | + | -17.03 | -16.93 |
| 130 | ethene                        | 362 | C=C[T36]             | * | -17.04 | -18.26 |
| 131 | methyl methacrylate           | 291 | COC(=O)C(C)=C[T22]   | * | -17.12 | -18.38 |
| 132 | vinylcyclohexane              | 298 | C=CC1CCCCC1[T24]     | + | -17.12 | -17.17 |
| 133 | 1-butene                      | 282 | CCC=C[T20]           | - | -17.13 | -17.38 |
| 134 | propene                       | 286 | CC=C[T22]            | # | -17.13 | -17.17 |
| 135 | 4-methyl-1-pentene            | 287 | CC(C)CC=C[T22]       | + | -17.14 | -17.24 |
| 136 | 2-methyl-1,3-butadiene        | 260 | CC(=C)C=C[T17]       | + | -17.16 | -17.07 |
| 137 | 1,3-butadiene                 | 298 | C=CC=C[T24]          | + | -17.17 | -17.02 |
| 138 | ethyl vinyl ketone            | 285 | CCC(=O)C=C[T22]      | + | -17.22 | -17.46 |
| 139 | ethyl acrylate                | 298 | CCOC(=O)C=C[T24]     | - | -17.24 | -17.42 |
| 140 | 3-chloro-1-butene             | 335 | CC(Cl)C=C[T31]       | - | -17.27 | -17.99 |
| 141 | propene                       | 260 | CC=C[T17]            | * | -17.29 | -17.06 |
| 142 | 2-methylpropene               | 260 | CC(C)=C[T17]         | * | -17.30 | -16.84 |
| 143 | 3-Buten-1-ol                  | 298 | OCCC=C[T24]          | + | -17.31 | -17.26 |
| 144 | 3-methyl-1-pentene            | 298 | CCC(C)C=C[T24]       | # | -17.31 | -17.45 |
| 145 | 1-butene                      | 260 | CCC=C[T17]           | * | -17.32 | -16.65 |
| 146 | methyl vinyl ketone           | 296 | CC(=O)C=C[T24]       | + | -17.32 | -17.41 |
| 147 | 3-chloro-1-butene             | 329 | CC(Cl)C=C[T30]       | + | -17.35 | -17.05 |
| 148 | methyl crotonate              | 291 | COC(=O)\C=C\C[T22]   | - | -17.36 | -17.54 |
| 149 | ethene                        | 332 | C=C[T30]             | # | -17.42 | -17.92 |
| 150 | 2-methylpropene               | 247 | CC(C)=C[T13]         | # | -17.44 | -17.46 |
| 151 | 3-chloro-1-butene             | 316 | CC(Cl)C=C[T28]       | # | -17.44 | -17.99 |
| 152 | 3-methyl-2-isopropyl-1-butene | 298 | CC(C)C(=C)C(C)C[T24] | # | -17.48 | -17.69 |
| 153 | 1-butene                      | 247 | CCC=C[T13]           | + | -17.50 | -17.27 |
| 154 | vinyl acetate                 | 298 | CC(=O)OC=C[T24]      | + | -17.50 | -17.44 |
| 155 | dimethylamine                 | 296 | CNC[T24]             | + | -17.58 | -17.59 |
| 156 | 3-chloro-1-butene             | 303 | CC(Cl)C=C[T26]       | # | -17.59 | -17.33 |
| 157 | furan                         | 298 | o1cccc1[T24]         | - | -17.62 | -17.90 |
| 158 | ethene                        | 309 | C=C[T27]             | - | -17.63 | -18.10 |
| 159 | ethene                        | 304 | C=C[T26]             | - | -17.64 | -18.20 |

|     |                                     |     |                       |   |        |        |
|-----|-------------------------------------|-----|-----------------------|---|--------|--------|
| 160 | trans-cinnamaldehyde                | 298 | O=C\C=C\Cc1cccc1[T24] | + | -17.66 | -17.63 |
| 161 | propene                             | 250 | CC=C[T14]             | * | -17.68 | -17.79 |
| 162 | 2-chloropropene                     | 393 | CC(Cl)=C[T43]         | * | -17.70 | -19.13 |
| 163 | trans-2-hexenal                     | 298 | CCC/C=C/C=O[T24]      | + | -17.70 | -17.69 |
| 164 | 2-methylpropene                     | 225 | CC(C)=C[T10]          | # | -17.71 | -17.64 |
| 165 | ethene                              | 297 | C=C[T24]              | + | -17.76 | -18.32 |
| 166 | 1-butene                            | 225 | CCC=C[T10]            | * | -17.77 | -17.45 |
| 167 | ethene                              | 294 | C=C[T24]              | - | -17.78 | -18.32 |
| 168 | ethene                              | 293 | C=C[T23]              | # | -17.80 | -18.86 |
| 169 | 2-chloropropene                     | 374 | CC(Cl)=C[T39]         | * | -17.81 | -19.13 |
| 170 | ethene                              | 292 | C=C[T22]              | - | -17.81 | -18.11 |
| 171 | ethene                              | 290 | C=C[T22]              | - | -17.85 | -18.11 |
| 172 | ethene                              | 288 | C=C[T22]              | * | -17.86 | -18.11 |
| 173 | ethene                              | 284 | C=C[T22]              | # | -17.91 | -18.11 |
| 174 | ethene                              | 283 | C=C[T21]              | - | -17.94 | -18.86 |
| 175 | methacrolein                        | 296 | CC(=C)C=O[T24]        | * | -17.95 | -18.59 |
| 176 | 2-ethyl acrolein                    | 289 | CCC(=C)C=O[T22]       | + | -17.97 | -18.06 |
| 177 | ethene                              | 286 | C=C[T22]              | * | -18.03 | -18.11 |
| 178 | crotonaldehyde                      | 296 | C/C=C/C=O[T24]        | * | -18.05 | -17.84 |
| 179 | trans-crotonaldehyde                | 298 | C/C=C/C=O[T24]        | + | -18.05 | -17.84 |
| 180 | vinyl fluoride                      | 294 | FC=C[T24]             | # | -18.16 | -18.77 |
| 181 | trans-1,3-dichloropropene           | 295 | ClC/C=C/Cl[T24]       | - | -18.17 | -18.61 |
| 182 | 2-chloropropene                     | 350 | CC(Cl)=C[T34]         | + | -18.21 | -18.07 |
| 183 | tetrachloroethene                   | 409 | ClC(Cl)=C(Cl)Cl[T47]  | # | -18.23 | -19.38 |
| 184 | ethene                              | 267 | C=C[T18]              | - | -18.24 | -18.52 |
| 185 | trans-1,2-dichloroethene            | 380 | Cl\C=C\Cl[T40]        | * | -18.25 | -18.59 |
| 186 | trans-1,2-dichloroethene            | 366 | Cl\C=C\Cl[T37]        | - | -18.35 | -18.68 |
| 187 | ethene                              | 260 | C=C[T17]              | * | -18.36 | -18.13 |
| 188 | 2-(chloromethyl)-3-chloro-1-propene | 295 | ClCC(=C)CCl[T24]      | # | -18.41 | -18.94 |
| 189 | tetrachloroethene                   | 402 | ClC(Cl)=C(Cl)Cl[T44]  | * | -18.45 | -19.67 |
| 190 | trans-1,2-dichloroethene            | 353 | Cl\C=C\Cl[T35]        | # | -18.45 | -19.43 |
| 191 | m-cresol                            | 298 | Cc1cccc(O)c1[T24]     | + | -18.50 | -18.52 |
| 192 | trichloroethene                     | 388 | ClC=C(Cl)Cl[T42]      | * | -18.51 | -19.70 |
| 193 | acrolein                            | 296 | C=CC=O[T24]           | * | -18.55 | -18.95 |
| 194 | acrolein                            | 286 | C=CC=O[T22]           | + | -18.59 | -18.68 |
| 195 | o-cresol                            | 296 | Cc1ccccc1O[T24]       | - | -18.59 | -18.84 |
| 196 | vinyl chloride                      | 298 | ClC=C[T24]            | * | -18.61 | -19.06 |
| 197 | ethene                              | 235 | C=C[T11]              | * | -18.65 | -18.58 |
| 198 | 2-(5H)-furanone                     | 298 | O=C1OCC=C1[T24]       | - | -18.66 | -18.92 |
| 199 | ethyl nitrite                       | 324 | CCON=O[T29]           | * | -18.67 | -19.64 |
| 200 | naphthalene                         | 298 | c1ccc2ccccc2c1[T24]   | + | -18.70 | -18.70 |

|     |                          |     |                      |   |        |        |
|-----|--------------------------|-----|----------------------|---|--------|--------|
| 201 | methyl nitrite           | 352 | CON=O[T34]           | - | -18.71 | -19.38 |
| 202 | 1,1-difluoroethene       | 294 | FC(F)=C[T24]         | - | -18.72 | -19.22 |
| 203 | 2-chloropropene          | 313 | CC(Cl)=C[T28]        | - | -18.72 | -18.96 |
| 204 | trans-1,2-dichloroethene | 326 | Cl\C=C/Cl[T29]       | # | -18.75 | -19.43 |
| 205 | ethyl nitrite            | 310 | CCON=O[T27]          | - | -18.80 | -18.88 |
| 206 | tetrachloroethene        | 395 | ClC(Cl)=C(Cl)Cl[T43] | - | -18.80 | -19.38 |
| 207 | cis-1,3-dichloropropene  | 295 | ClC\C=C/Cl[T24]      | # | -18.82 | -18.30 |
| 208 | trichloroethene          | 378 | ClC=C(Cl)Cl[T40]     | - | -18.83 | -19.34 |
| 209 | vinyl fluoride           | 260 | FC=C[T17]            | + | -18.85 | -18.59 |
| 210 | ethene                   | 233 | C=C[T11]             | * | -18.86 | -18.58 |
| 211 | 2-chloropropene          | 294 | CC(Cl)=C[T24]        | # | -18.96 | -18.42 |
| 212 | Methyl cyanide           | 298 | CC#N[T24]            | + | -19.00 | -19.00 |
| 213 | trichloroethene          | 371 | ClC=C(Cl)Cl[T38]     | + | -19.02 | -19.63 |
| 214 | trans-1,2-dichloroethene | 301 | Cl\C=C/Cl[T25]       | * | -19.05 | -18.34 |
| 215 | tetrachloroethene        | 389 | ClC(Cl)=C(Cl)Cl[T42] | * | -19.06 | -19.67 |
| 216 | cis-1,2-dichloroethene   | 382 | Cl\C=C/Cl[T40]       | * | -19.13 | -19.07 |
| 217 | ethene                   | 225 | C=C[T10]             | + | -19.14 | -18.93 |
| 218 | ethene                   | 216 | C=C[T8]              | * | -19.35 | -18.86 |
| 219 | ethene                   | 208 | C=C[T6]              | # | -19.37 | -18.86 |
| 220 | tetrachloroethene        | 382 | ClC(Cl)=C(Cl)Cl[T40] | + | -19.37 | -18.89 |
| 221 | Benzyl chloride          | 298 | ClCc1ccccc1[T24]     | + | -19.40 | -19.41 |
| 222 | cis-1,2-dichloroethene   | 354 | Cl\C=C/Cl[T35]       | # | -19.45 | -19.91 |
| 223 | acetaldehyde             | 298 | CC=O[T24]            | # | -19.47 | -19.17 |
| 224 | methyl nitrite           | 326 | CON=O[T29]           | # | -19.51 | -20.28 |
| 225 | trichloroethene          | 347 | ClC=C(Cl)Cl[T34]     | # | -19.61 | -18.93 |
| 226 | cis-1,2-dichloroethene   | 341 | Cl\C=C/Cl[T32]       | - | -19.62 | -19.91 |
| 227 | trifluoroethene          | 260 | FC=C(F)F[T17]        | + | -19.62 | -19.59 |
| 228 | ethene                   | 198 | C=C[T4]              | * | -19.74 | -18.86 |
| 229 | cis-1,2-dichloroethene   | 328 | Cl\C=C/Cl[T29]       | # | -19.79 | -19.91 |
| 230 | tetrachloroethene        | 369 | ClC(Cl)=C(Cl)Cl[T38] | + | -19.81 | -19.18 |
| 231 | methyl nitrite           | 298 | CON=O[T24]           | - | -19.89 | -19.73 |
| 232 | ethene                   | 188 | C=C[T2]              | - | -19.97 | -18.86 |
| 233 | cis-1,2-dichloroethene   | 315 | Cl\C=C/Cl[T28]       | - | -20.04 | -19.91 |
| 234 | ethene                   | 183 | C=C[T1]              | - | -20.16 | -18.86 |
| 235 | ethene                   | 178 | C=C[T0]              | + | -20.30 | -20.29 |
| 236 | 1,1-dichloroethene       | 298 | ClC(Cl)=C[T24]       | - | -20.43 | -20.68 |
| 237 | glyoxal                  | 298 | O=CC=O[T24]          | + | -20.50 | -20.58 |
| 238 | Isobutane                | 298 | CC(C)C[T24]          | * | -22.70 | -23.38 |
| 239 | ethane                   | 298 | CC[T24]              | # | -23.00 | -23.75 |
| 240 | n-butane                 | 298 | CCCC[T24]            | * | -23.00 | -23.36 |
| 241 | 1,1-Difluoroethane       | 298 | CC(F)F[T24]          | * | -24.20 | -24.11 |

|     |                             |       |                           |   |        |        |
|-----|-----------------------------|-------|---------------------------|---|--------|--------|
| 242 | 1,1,1-Trifluoroethane       | 298   | CC(F)(F)F[T24]            | + | -25.30 | -25.31 |
| 243 | terpinolene                 | 298   | CC(C)=C1CCC(=CC1)C[T24]   | * | -14.00 | -13.67 |
| 244 | myrcene                     | 298   | CC(C)=CCCC(=C)C=C[T24]    | + | -14.90 | -14.60 |
| 245 | 2-methyl-2-butene           | 363   | CC=C(C)C[T37]             | - | -15.17 | -15.24 |
| 246 | cyclopentene                | 260   | C1CC=CC1[T17]             | + | -15.24 | -15.52 |
| 247 | trans-2-butene              | 364   | C\C=C\C[T37]              | * | -15.41 | -15.57 |
| 248 | 6-methyl-5-hepten-2-one     | 287   | CC(C)=CCCC(C)=O[T22]      | * | -15.47 | -15.79 |
| 249 | trans-2-butene              | 299   | C\C=C\C[T25]              | * | -15.58 | -15.58 |
| 250 | 2-methyl-2-butene           | 247   | CC=C(C)C[T13]             | - | -15.65 | -15.89 |
| 251 | cis-2-butene                | 336   | C\C=C/C[T31]              | * | -15.71 | -16.63 |
| 252 | cyclohexene                 | 299   | C1CCC=CC1[T25]            | + | -15.80 | -15.52 |
| 253 | cis-3-hexene                | 298   | CC\C=C/CC[T24]            | # | -15.84 | -15.97 |
| 254 | 2-pentene, 2,4,4-trimethyl  | 298   | CC(=CC(C)(C)C)C[T24]      | - | -15.86 | -15.87 |
| 255 | trans-5-decene              | 298   | CCCC\C=C\CCCC[T24]        | + | -15.89 | -16.06 |
| 256 | cyclohexene                 | 260   | C1CCC=CC1[T17]            | # | -15.93 | -15.54 |
| 257 | cis-2-butene                | 287   | C\C=C/C[T22]              | + | -16.00 | -16.06 |
| 258 | cis-4-octene                | 298   | CCC\C=C/CCC[T24]          | # | -16.05 | -16.01 |
| 259 | bicyclo[2.2.2]-2-octene     | 297   | C1CC2CCC1C=C2[T24]        | # | -16.14 | -15.89 |
| 260 | cis-3-hexen-1-ol            | 298   | CC\C=C/CCO[T24]           | - | -16.19 | -16.41 |
| 261 | trans-2,2-dimethyl-3-hexene | 296   | CC/C=C/C(C)(C)C[T24]      | * | -16.36 | -16.38 |
| 262 | trans-2,2-dimethyl-3-hexene | 298   | CC/C=C/C(C)(C)C[T24]      | + | -16.40 | -16.38 |
| 263 | 2-methylpropene             | 363   | CC(C)=C[T37]              | * | -16.51 | -16.81 |
| 264 | (Z)-1,3-pentadiene          | 298   | C\C=C/C=C[T24]            | * | -16.56 | -15.97 |
| 265 | trans-2-hexenyl acetate     | 288.5 | CCC/C=C/COC(C)=O[T22]     | * | -16.71 | -16.56 |
| 266 | propene                     | 332   | CC=C[T30]                 | + | -16.75 | -16.85 |
| 267 | 1,4-pentadiene              | 298   | C=CCC=C[T24]              | - | -16.84 | -16.84 |
| 268 | allyl alcohol               | 298   | OCC=C[T24]                | * | -16.84 | -17.82 |
| 269 | 1-butene, 2-methyl          | 298   | CCC(=C)C[T24]             | * | -16.88 | -17.23 |
| 270 | 1-butene                    | 294   | CCC=C[T24]                | - | -16.90 | -16.84 |
| 271 | 1-butene                    | 298   | CCC=C[T24]                | * | -16.91 | -16.84 |
| 272 | 2-methylpropene             | 298   | CC(C)=C[T24]              | # | -16.94 | -17.02 |
| 273 | methylenecyclohexane        | 298   | [CH2]=[C]1CC[CH2]CC1[T24] | - | -16.98 | -17.17 |
| 274 | 1-butene, 2,3-dimethyl      | 298   | CC(C)C(=C)C[T24]          | * | -17.00 | -16.97 |
| 275 | 1-decene                    | 298   | CCCCCCCCC=C[T24]          | # | -17.10 | -17.36 |
| 276 | 1,3-butadiene               | 303   | C=CC=C[T26]               | * | -17.13 | -16.90 |
| 277 | 2-methyl-1,3-butadiene      | 278   | CC(=C)C=C[T20]            | * | -17.24 | -17.80 |
| 278 | 3,3-dimethyl-1-butene       | 298   | CC(C)(C)C=C[T24]          | + | -17.28 | -17.37 |
| 279 | propene                     | 267   | CC=C[T18]                 | + | -17.32 | -17.45 |
| 280 | 1-butene, 3,3-dimethyl      | 298   | CC(C)(C)C=C[T24]          | * | -17.41 | -17.37 |
| 281 | 3-chloro-1-butene           | 309   | CC(Cl)C=C[T27]            | # | -17.56 | -17.22 |
| 282 | ethene                      | 303   | C=C[T26]                  | * | -17.59 | -18.20 |

|     |                          |     |                      |   |        |        |
|-----|--------------------------|-----|----------------------|---|--------|--------|
| 283 | 3-chloro-1-butene        | 292 | CC(Cl)C=C[T22]       | + | -17.70 | -17.43 |
| 284 | ethene                   | 299 | C=C[T25]             | - | -17.74 | -18.12 |
| 285 | ethene                   | 296 | C=C[T24]             | - | -17.85 | -18.32 |
| 286 | 2-cyclohexen-1-one       | 296 | O=C1CCCC=C1[T24]     | # | -17.91 | -17.63 |
| 287 | methyl acrylate          | 298 | COC(=O)C=C[T24]      | + | -17.98 | -18.00 |
| 288 | trans-1,2-dichloroethene | 394 | Cl\C=C\Cl[T43]       | * | -18.08 | -19.08 |
| 289 | p-cresol                 | 296 | Cc1ccc(O)cc1[T24]    | # | -18.33 | -18.22 |
| 290 | 2-chloropropene          | 339 | CC(Cl)=C[T32]        | - | -18.40 | -18.96 |
| 291 | trans-1,2-dichloroethene | 340 | Cl\C=C\Cl[T32]       | * | -18.58 | -19.08 |
| 292 | ethyl nitrite            | 328 | CCON=O[T29]          | * | -18.60 | -19.64 |
| 293 | m-cresol                 | 296 | Cc1cccc(O)c1[T24]    | # | -18.71 | -18.52 |
| 294 | 1,2-propadiene           | 298 | [CH2]=[C]=[CH2][T24] | * | -18.72 | -18.28 |
| 295 | trifluoroethene          | 294 | FC=C(F)F[T24]        | * | -18.85 | -19.77 |
| 296 | ethyl nitrite            | 298 | CCON=O[T24]          | + | -18.93 | -19.10 |
| 297 | 1,1-difluoroethene       | 290 | FC(F)=C[T22]         | - | -19.10 | -19.01 |
| 298 | trichloroethene          | 360 | ClC=C(Cl)Cl[T36]     | + | -19.24 | -19.23 |
| 299 | ethylamine               | 296 | CCN[T24]             | # | -19.56 | -19.21 |
| 300 | ethene                   | 193 | C=C[T3]              | + | -19.83 | -19.88 |
| 301 | trichloroethene          | 334 | ClC=C(Cl)Cl[T31]     | - | -19.97 | -19.83 |
| 302 | propane                  | 298 | CCC[T24]             | - | -23.20 | -23.24 |



**Table S2.** The goodness of fit criteria for all models obtained by TF0, TF1, TF2, and TF3 for nine splits

| Split   | Target Function | Set      | n  | R <sup>2</sup> | CCC    | IIC    | CII    | Q <sup>2</sup> | Q <sup>2</sup> <sub>F1</sub> | Q <sup>2</sup> <sub>F2</sub> | Q <sup>2</sup> <sub>F3</sub> | RMSE   | MAE    | F    | $\bar{R}_m^2$ | $\Delta\bar{R}_m^2$ | Y-Test | cR <sup>2</sup> <sub>p</sub> |
|---------|-----------------|----------|----|----------------|--------|--------|--------|----------------|------------------------------|------------------------------|------------------------------|--------|--------|------|---------------|---------------------|--------|------------------------------|
| Split 1 | TF0             | ATR<br>N | 79 | 0.9856         | 0.9928 | 0.7501 | 0.9888 | 0.9850         |                              |                              |                              | 0.200  | 0.135  | 5274 |               |                     |        | 0.9779                       |
|         |                 | PTRN     | 68 | 0.9648         | 0.9692 | 0.7202 | 0.9736 | 0.9628         |                              |                              |                              | 0.390  | 0.323  | 1811 |               |                     |        | 0.9560                       |
|         |                 | CAL      | 65 | 0.6119         | 0.7718 | 0.6698 | 0.7525 | 0.5802         | 0.4843                       | 0.4796                       | 0.5363                       | 1.11   | 0.767  | 99   | 0.4758        | 0.1304              |        | 0.6094                       |
|         |                 | VAL      | 90 | 0.8634         | 0.9177 | 0.6751 | 0.9081 | 0.5862         |                              |                              |                              | 0.7077 | 0.5279 | 556  | 0.8020        | 0.0654              | 0.0132 |                              |
|         | TF1             | ATR<br>N | 79 | 0.8280         | 0.9059 | 0.8434 | 0.9022 | 0.8066         |                              |                              |                              | 0.691  | 0.514  | 371  |               |                     |        | 0.8243                       |
|         |                 | PTRN     | 68 | 0.8187         | 0.8970 | 0.8443 | 0.9112 | 0.8028         |                              |                              |                              | 0.683  | 0.534  | 298  |               |                     |        | 0.8107                       |
|         |                 | CAL      | 65 | 0.8268         | 0.9020 | 0.9093 | 0.9020 | 0.8093         | 0.8200                       | 0.8183                       | 0.8381                       | 0.658  | 0.535  | 301  | 0.7486        | 0.1520              |        | 0.8113                       |
|         |                 | VAL      | 90 | 0.7976         | 0.8830 | 0.7702 | 0.9092 | 0.7771         |                              |                              |                              | 0.7891 | 0.6175 | 347  | 0.7093        | 0.1475              | 0.0148 |                              |
|         | TF2             | ATR<br>N | 79 | 0.9834         | 0.9916 | 0.7888 | 0.9882 | 0.9825         |                              |                              |                              | 0.215  | 0.156  | 4551 |               |                     |        | 0.9768                       |
|         |                 | PTRN     | 68 | 0.9578         | 0.9710 | 0.8675 | 0.9682 | 0.9554         |                              |                              |                              | 0.382  | 0.289  | 1498 |               |                     |        | 0.9532                       |
|         |                 | CAL      | 65 | 0.9276         | 0.9592 | 0.7878 | 0.9615 | 0.9230         | 0.9129                       | 0.9129                       | 0.9224                       | 0.455  | 0.359  | 807  | 0.8770        | 0.0709              |        | 0.9218                       |
|         |                 | VAL      | 90 | 0.9136         | 0.9464 | 0.5804 | 0.9410 | 0.9086         |                              |                              |                              | 0.5730 | 0.4433 | 937  | 0.8698        | 0.4433              | 0.0141 |                              |
|         | TF3             | ATR<br>N | 79 | 0.8646         | 0.9274 | 0.9066 | 0.9279 | 0.8491         |                              |                              |                              | 0.613  | 0.464  | 492  |               |                     |        | 0.8614                       |
|         |                 | PTRN     | 68 | 0.8091         | 0.8938 | 0.7381 | 0.9049 | 0.7926         |                              |                              |                              | 708    | 0.549  | 280  |               |                     |        | 0.8014                       |
|         |                 | CAL      | 65 | 0.8210         | 0.9060 | 0.8972 | 0.8972 | 0.8039         | 0.8131                       | 0.8114                       | 0.8319                       | 670    | 0.524  | 289  | 0.7442        | 0.0022              |        | 0.8120                       |
|         |                 | VAL      | 90 | 0.8285         | 0.9007 | 0.8151 | 0.9098 | 0.8120         |                              |                              |                              | 0.7455 | 0.5852 | 425  | 0.7537        | 0.0717              | 0.0149 |                              |
| Split 2 | TF0             | ATR<br>N | 79 | 0.9744         | 0.9870 | 0.7081 | 0.9808 | 0.9732         |                              |                              |                              | 0.264  | 0.168  | 2931 |               |                     |        | 0.9688                       |
|         |                 | PTRN     | 79 | 0.9560         | 0.9765 | 0.9364 | 0.9659 | 0.9538         |                              |                              |                              | 0.348  | 0.218  | 1674 |               |                     |        | 0.9537                       |
|         |                 | CAL      | 54 | 0.6221         | 0.7817 | 0.6422 | 0.7842 | 0.5626         | 0.4960                       | 0.4960                       | 0.6355                       | 0.987  | 0.607  | 86   | 0.4856        | 0.1666              |        | 0.6098                       |
|         |                 | VAL      | 90 | 0.8548         | 0.9236 | 0.8025 | 0.9055 | 0.8426         |                              |                              |                              | 0.7066 | 0.5005 | 518  | 0.7899        | 0.0763              | 0.0092 |                              |
|         | TF1             | ATR<br>N | 79 | 0.8287         | 0.9063 | 0.7241 | 0.9139 | 0.8134         |                              |                              |                              | 0.682  | 0.539  | 373  |               |                     |        | 0.8247                       |
|         |                 | PTRN     | 79 | 0.8390         | 0.9150 | 0.8752 | 0.9191 | 0.8257         |                              |                              |                              | 0.673  | 0.527  | 401  |               |                     |        | 0.8303                       |
|         |                 | CAL      | 54 | 0.8007         | 0.8749 | 0.8948 | 0.9021 | 0.7858         | 0.7844                       | 0.7844                       | 0.8440                       | 0.645  | 0.482  | 209  | 0.6557        | 0.1940              |        | 0.7904                       |
|         |                 | VAL      | 90 | 0.8465         | 0.9105 | 0.7780 | 0.9011 | 0.8368         |                              |                              |                              | 0.7011 | 0.5280 | 485  | 0.7329        | 0.1499              | 0.0086 |                              |
|         | TF2             | ATR<br>N | 79 | 0.9650         | 0.9822 | 0.9578 | 0.9749 | 0.9630         |                              |                              |                              | 0.308  | 0.215  | 2125 |               |                     |        | 0.9568                       |

|         |          |          |          |        |        |        |        |        |        |        |        |        |        |        |        |        |        |        |        |        |
|---------|----------|----------|----------|--------|--------|--------|--------|--------|--------|--------|--------|--------|--------|--------|--------|--------|--------|--------|--------|--------|
|         |          | PTRN     | 79       | 0.9446 | 0.9662 | 0.8630 | 0.9617 | 0.9416 |        |        |        | 0.442  | 0.321  | 1313   |        |        |        | 0.9383 |        |        |
|         |          | CAL      | 54       | 0.8982 | 0.9416 | 0.6120 | 0.9563 | 0.8893 | 0.8894 | 0.8894 | 0.9200 | 0.462  | 0.367  | 459    | 0.8364 | 0.0978 |        |        | 0.8932 |        |
|         |          | VAL      | 90       | 0.9037 | 0.9501 | 0.8266 | 0.9324 | 0.8998 |        |        |        | 0.5670 | 0.4319 | 823    | 0.8589 | 0.0555 | 0.0093 |        |        |        |
|         | TF3      | ATR<br>N | 79       | 0.8299 | 0.9071 | 0.7627 | 0.9059 | 0.8179 |        |        |        | 0.680  | 0.546  | 376    |        |        |        |        | 0.8244 |        |
|         |          | PTRN     | 79       | 0.7809 | 0.8736 | 0.6326 | 0.8846 | 0.7630 |        |        |        | 0.865  | 0.612  | 274    |        |        |        |        | 0.7743 |        |
|         |          | CAL      | 54       | 0.8382 | 0.9025 | 0.9154 | 0.9240 | 0.8251 | 0.8328 | 0.8328 | 0.8790 | 0.568  | 0.435  | 269    | 0.6957 | 0.1652 |        |        | 0.8265 |        |
|         |          | VAL      | 90       | 0.8337 | 0.9127 | 0.8246 | 0.9113 | 0.8211 |        |        |        | 0.7428 | 0.5885 | 441    | 0.7615 | 0.0239 | 0.0092 |        |        |        |
|         | Split 3  | TF0      | ATR<br>N | 88     | 0.9890 | 0.9944 | 0.7915 | 0.9910 | 0.9886 |        |        |        | 0.173  | 0.116  | 7704   |        |        |        |        | 0.9817 |
|         |          |          | PTRN     | 87     | 0.9659 | 0.9823 | 0.8118 | 0.9728 | 0.9647 |        |        |        | 0.369  | 0.246  | 2411   |        |        |        |        | 0.9618 |
|         |          |          | CAL      | 42     | 0.6650 | 0.7798 | 0.7634 | 0.7977 | 0.6359 | 0.6744 | 0.3863 | 0.8350 | 0.736  | 0.562  | 79     | 0.4760 | 0.2975 |        |        | 0.6595 |
|         |          |          | VAL      | 85     | 0.7879 | 0.8768 | 0.6843 | 0.8758 | 0.7742 |        |        |        | 0.7271 | 0.5168 | 308    | 0.6959 | 0.1543 | 0.0153 |        |        |
|         |          | TF1      | ATR<br>N | 88     | 0.8538 | 0.9211 | 0.7022 | 0.9126 | 0.8455 |        |        |        | 0.631  | 0.502  | 502    |        |        |        |        | 0.8485 |
| PTRN    |          |          | 87       | 0.8445 | 0.9184 | 0.7685 | 0.9210 | 0.8323 |        |        |        | 0.787  | 0.612  | 462    |        |        |        |        | 0.8383 |        |
| CAL     |          |          | 42       | 0.6816 | 0.7252 | 0.8256 | 0.8281 | 0.6480 | 0.5233 | 0.1017 | 0.7584 | 0.891  | 0.740  | 86     | 0.4485 | 0.3156 |        |        | 0.6680 |        |
| VAL     |          |          | 85       | 0.7314 | 0.8129 | 0.7037 | 0.8847 | 0.7105 |        |        |        | 0.8938 | 0.7251 | 226    | 0.6253 | 0.0570 | 0.0124 |        |        |        |
| TF2     |          | ATR<br>N | 88       | 0.9866 | 0.9932 | 0.8665 | 0.9901 | 0.9860 |        |        |        | 0.191  | 0.132  | 6325   |        |        |        |        | 0.9832 |        |
|         |          | PTRN     | 87       | 0.9574 | 0.9777 | 0.8604 | 0.9695 | 0.9556 |        |        |        | 0.411  | 0.297  | 1912   |        |        |        |        | 0.9532 |        |
|         |          | CAL      | 42       | 0.9361 | 0.9231 | 0.6887 | 0.9850 | 0.9268 | 0.8914 | 0.7953 | 0.9450 | 0.425  | 0.324  | 586    | 0.7224 | 0.1087 |        |        | 0.9236 |        |
|         |          | VAL      | 85       | 0.8955 | 0.9368 | 0.7375 | 0.9386 | 0.8897 |        |        |        | 0.5178 | 0.4113 | 712    | 0.8149 | 0.1030 | 0.0148 |        |        |        |
| TF3     | ATR<br>N | 88       | 0.8490   | 0.9184 | 0.8805 | 0.9066 | 0.8408 |        |        |        | 0.641  | 0.517  | 484    |        |        |        |        | 0.8366 |        |        |
|         | PTRN     | 87       | 0.8494   | 0.9187 | 0.7454 | 0.9091 | 0.8411 |        |        |        | 0.775  | 0.632  | 479    |        |        |        |        | 0.8444 |        |        |
|         | CAL      | 42       | 0.6957   | 0.7335 | 0.8341 | 0.8319 | 0.6636 | 0.5224 | 0.1000 | 0.7580 | 0.892  | 0.735  | 91     | 0.4313 | 0.3273 |        |        | 0.6815 |        |        |
|         | VAL      | 85       | 0.7582   | 0.8178 | 0.7614 | 0.8845 | 0.7376 |        |        |        | 0.8754 | 0.6875 | 260    | 0.6604 | 0.0129 | 0.0133 |        |        |        |        |
| Split 4 | TF0      | ATR<br>N | 84       | 0.9736 | 0.9866 | 0.6384 | 0.9819 | 0.9723 |        |        |        | 0.218  | 0.154  | 3020   |        |        |        |        | 0.9696 |        |
|         |          | PTRN     | 70       | 0.9544 | 0.9739 | 0.5850 | 0.9646 | 0.9520 |        |        |        | 0.426  | 0.298  | 1422   |        |        |        |        | 0.9518 |        |
|         |          | CAL      | 61       | 0.8167 | 0.8979 | 0.8413 | 0.8778 | 0.8017 | 0.7747 | 0.7697 | 0.6601 | 0.938  | 0.637  | 263    | 0.7247 | 0.1665 |        |        | 0.8125 |        |
|         |          | VAL      | 87       | 0.8030 | 0.8759 | 0.5655 | 0.8957 | 0.7841 |        |        |        | 0.7483 | 0.5206 | 346    | 0.6960 | 0.1804 | 0.0123 |        |        |        |
|         | TF1      | ATR<br>N | 84       | 0.8276 | 0.9057 | 0.8674 | 0.9018 | 0.8195 |        |        |        | 0.556  | 0.454  | 394    |        |        |        |        | 0.8220 |        |

|         |          |          |          |        |        |        |        |        |        |        |        |        |        |        |        |        |        |        |        |
|---------|----------|----------|----------|--------|--------|--------|--------|--------|--------|--------|--------|--------|--------|--------|--------|--------|--------|--------|--------|
|         |          | PTRN     | 70       | 0.7877 | 0.8449 | 0.6860 | 0.9008 | 0.7697 |        |        |        | 0.908  | 0.682  | 252    |        |        |        | 0.7823 |        |
|         |          | CAL      | 61       | 0.8122 | 0.8400 | 0.9012 | 0.9064 | 0.7933 | 0.7670 | 0.7619 | 0.6485 | 0.954  | 0.666  | 255    | 0.5178 | 0.2628 |        |        | 0.8055 |
|         |          | VAL      | 87       | 0.7415 | 0.8226 | 0.8286 | 0.8969 | 0.7234 |        |        |        | 0.7295 | 0.5510 | 241    | 0.5224 | 0.2688 | 0.0138 |        |        |
|         | TF2      | ATR<br>N | 84       | 0.9707 | 0.9851 | 0.8956 | 0.9815 | 0.9691 |        |        |        | 0.229  | 0.166  | 2713   |        |        |        |        | 0.9648 |
|         |          | PTRN     | 70       | 0.9509 | 0.9736 | 0.9504 | 0.9630 | 0.9481 |        |        |        | 0.431  | 0.303  | 1318   |        |        |        |        | 0.9487 |
|         |          | CAL      | 61       | 0.9495 | 0.9641 | 0.6687 | 0.9769 | 0.9412 | 0.9177 | 0.9159 | 0.8759 | 0.567  | 0.390  | 1109   | 0.8105 | 0.0684 |        |        | 0.9445 |
|         |          | VAL      | 87       | 0.8952 | 0.9334 | 0.6880 | 0.9443 | 0.8872 |        |        |        | 0.5348 | 0.4116 | 747    | 0.8102 | 0.1041 | 0.0138 |        |        |
|         | TF3      | ATR<br>N | 84       | 0.8256 | 0.9044 | 0.8663 | 0.9024 | 0.8162 |        |        |        | 0.559  | 0.444  | 388    |        |        |        |        | 0.8205 |
|         |          | PTRN     | 70       | 0.7960 | 0.8618 | 0.6354 | 0.8834 | 0.7783 |        |        |        | 0.872  | 0.623  | 265    |        |        |        |        | 0.7884 |
|         |          | CAL      | 61       | 0.8352 | 0.8641 | 0.9137 | 0.9163 | 0.8182 | 0.7934 | 0.7888 | 0.6884 | 0.898  | 0.614  | 299    | 0.5867 | 0.2153 |        |        | 0.8244 |
|         |          | VAL      | 87       | 0.7176 | 0.8322 | 0.7158 | 0.8764 | 0.6951 |        |        |        | 0.7347 | 0.5346 | 216    | 0.5817 | 0.2443 | 0.0131 |        |        |
|         | Split 5  | TF0      | ATR<br>N | 75     | 0.9719 | 0.9857 | 0.9599 | 0.9788 | 0.9703 |        |        |        | 0.249  | 0.171  | 2523   |        |        |        |        |
| PTRN    |          |          | 80       | 0.9527 | 0.9754 | 0.8165 | 0.9692 | 0.9492 |        |        |        | 0.305  | 0.208  | 1570   |        |        |        |        | 0.9477 |
| CAL     |          |          | 61       | 0.7807 | 0.8785 | 0.8012 | 0.8890 | 0.7487 | 0.7816 | 0.7793 | 0.5448 | 0.973  | 0.657  | 210    | 0.6867 | 0.1528 |        |        | 0.7721 |
| VAL     |          |          | 86       | 0.8774 | 0.9345 | 0.8641 | 0.9213 | 0.8702 |        |        |        | 0.5807 | 0.4392 | 601    | 0.8221 | 0.0202 | 0.0137 |        |        |
| TF1     |          | ATR<br>N | 75       | 0.8218 | 0.9022 | 0.8827 | 0.9049 | 0.8021 |        |        |        | 0.626  | 0.451  | 337    |        |        |        |        | 0.8171 |
|         |          | PTRN     | 80       | 0.7684 | 0.8734 | 0.7467 | 0.8924 | 0.7560 |        |        |        | 0.697  | 0.567  | 259    |        |        |        |        | 0.7647 |
|         |          | CAL      | 61       | 0.7598 | 0.8150 | 0.8716 | 0.8805 | 0.7264 | 0.7296 | 0.7268 | 0.4363 | 1.08   | 0.672  | 187    | 0.4754 | 0.2966 |        |        | 0.7502 |
|         |          | VAL      | 86       | 0.7459 | 0.8452 | 0.7138 | 0.8937 | 0.7289 |        |        |        | 0.8167 | 0.6025 | 247    | 0.6051 | 0.2290 | 0.0110 |        |        |
| TF2     |          | ATR<br>N | 75       | 0.9739 | 0.9868 | 0.9110 | 0.9808 | 0.9725 |        |        |        | 0.239  | 0.163  | 2726   |        |        |        |        | 0.9689 |
|         |          | PTRN     | 80       | 0.9460 | 0.9714 | 0.9139 | 0.9654 | 0.9421 |        |        |        | 0.327  | 0.223  | 1365   |        |        |        |        | 0.9386 |
|         |          | CAL      | 61       | 0.9419 | 0.9686 | 0.8129 | 0.9688 | 0.9327 | 0.9415 | 0.9409 | 0.8781 | 0.504  | 0.361  | 956    | 0.8846 | 0.0587 |        |        | 0.9337 |
|         |          | VAL      | 86       | 0.8910 | 0.9434 | 0.7194 | 0.9266 | 0.8852 |        |        |        | 0.5330 | 0.4071 | 687    | 0.8412 | 0.0156 | 0.0134 |        |        |
| TF3     | ATR<br>N | 75       | 0.8055   | 0.8923 | 0.8285 | 0.9141 | 0.7872 |        |        |        | 0.654  | 0.484  | 302    |        |        |        |        | 0.7948 |        |
|         | PTRN     | 80       | 0.7453   | 0.8554 | 0.7326 | 0.8907 | 0.7321 |        |        |        | 0.718  | 0.567  | 228    |        |        |        |        | 0.7399 |        |
|         | CAL      | 61       | 0.7594   | 0.8075 | 0.8715 | 0.9003 | 0.7274 | 0.7230 | 0.7200 | 0.4224 | 1.10   | 0.691  | 186    | 0.4550 | 0.3114 |        |        | 0.7511 |        |
|         | VAL      | 86       | 0.7489   | 0.8404 | 0.8361 | 0.8905 | 0.7309 |        |        |        | 0.8130 | 0.6065 | 250    | 0.5725 | 0.2418 | 0.0111 |        |        |        |
| Split 6 | TF0      | ATR<br>N | 84       | 0.9874 | 0.9937 | 0.8612 | 0.9904 | 0.9869 |        |        |        | 0.185  | 0.129  | 6441   |        |        |        |        | 0.9839 |

|      |         |          |          |        |        |        |        |        |        |        |        |        |        |       |        |        |        |        |        |
|------|---------|----------|----------|--------|--------|--------|--------|--------|--------|--------|--------|--------|--------|-------|--------|--------|--------|--------|--------|
|      |         | PTRN     | 71       | 0.9663 | 0.9798 | 0.8524 | 0.9745 | 0.9644 |        |        |        | 0.332  | 0.230  | 1976  |        |        |        | 0.9571 |        |
|      |         | CAL      | 56       | 0.7407 | 0.8412 | 0.7585 | 0.8432 | 0.7128 | 0.6064 | 0.5977 | 0.6754 | 0.938  | 0.690  | 154   | 0.5805 | 0.2397 |        |        | 0.7330 |
|      |         | VAL      | 91       | 0.8836 | 0.9179 | 0.5606 | 0.9222 | 0.8761 |        |        |        | 0.7438 | 0.5603 | 679   | 0.7768 | 0.1183 | 0.0105 |        |        |
|      | TF1     | ATR<br>N | 84       | 0.8209 | 0.9017 | 0.8237 | 0.9161 | 0.7987 |        |        |        | 0.700  | 0.515  | 376   |        |        |        |        | 0.8173 |
|      |         | PTRN     | 71       | 0.7850 | 0.8833 | 0.8521 | 0.8989 | 0.7655 |        |        |        | 0.773  | 0.585  | 252   |        |        |        |        | 0.7790 |
|      |         | CAL      | 56       | 0.7563 | 0.8689 | 0.8697 | 0.8766 | 0.7200 | 0.7512 | 0.7457 | 0.7948 | 0.746  | 0.567  | 168   | 0.6577 | 0.0511 |        |        | 0.7450 |
|      |         | VAL      | 91       | 0.7870 | 0.8678 | 0.7126 | 0.9169 | 0.7646 |        |        |        | 0.8103 | 0.6096 | 328   | 0.6480 | 0.2012 | 0.0099 |        |        |
|      | TF2     | ATR<br>N | 84       | 0.9810 | 0.9904 | 0.8584 | 0.9857 | 0.9801 |        |        |        | 0.228  | 0.155  | 4227  |        |        |        |        | 0.9783 |
|      |         | PTRN     | 71       | 0.9569 | 0.9723 | 0.7565 | 0.9677 | 0.9543 |        |        |        | 0.391  | 0.282  | 1532  |        |        |        |        | 0.9483 |
|      |         | CAL      | 56       | 0.9097 | 0.9422 | 0.8120 | 0.9543 | 0.9006 | 0.8668 | 0.8639 | 0.8902 | 0.546  | 0.432  | 544   | 0.7757 | 0.1033 |        |        | 0.8990 |
|      |         | VAL      | 91       | 0.9126 | 0.9471 | 0.6621 | 0.9469 | 0.9073 |        |        |        | 0.5758 | 0.4389 | 929   | 0.8488 | 0.0856 | 0.0105 |        |        |
|      | TF3     | ATR<br>N | 84       | 0.8226 | 0.9027 | 0.7492 | 0.9157 | 0.8012 |        |        |        | 0.697  | 0.543  | 380   |        |        |        |        | 0.8192 |
|      |         | PTRN     | 71       | 0.7843 | 0.8823 | 0.8611 | 0.9065 | 0.7642 |        |        |        | 0.793  | 0.618  | 251   |        |        |        |        | 0.7803 |
|      |         | CAL      | 56       | 0.7689 | 0.8738 | 0.8769 | 0.8900 | 0.7314 | 0.7399 | 0.7342 | 0.7855 | 0.763  | 0.583  | 180   | 0.6739 | 0.0644 |        |        | 0.7613 |
|      |         | VAL      | 91       | 0.8136 | 0.8891 | 0.8767 | 0.9229 | 0.7942 |        |        |        | 0.7615 | 0.6086 | 388   | 0.7179 | 0.1700 | 0.0103 |        |        |
|      | Split 7 | TF0      | ATR<br>N | 86     | 0.9864 | 0.9932 | 0.9932 | 0.9896 | 0.9859 |        |        |        | 0.189  | 0.127 | 6105   |        |        |        |        |
| PTRN |         |          | 80       | 0.9632 | 0.9757 | 0.9002 | 0.9719 | 0.9614 |        |        |        | 0.379  | 0.272  | 2040  |        |        |        |        | 0.9568 |
| CAL  |         |          | 43       | 0.7110 | 0.7962 | 0.7729 | 0.8338 | 0.6781 | 0.6921 | 0.4181 | 0.7824 | 0.778  | 0.578  | 101   | 0.5055 | 0.2808 |        |        | 0.7073 |
| VAL  |         |          | 93       | 0.8925 | 0.9298 | 0.6874 | 0.9230 | 0.8883 |        |        |        | 0.6673 | 0.5093 | 756   | 0.8395 | 0.1013 | 0.0122 |        |        |
| TF1  |         | ATR<br>N | 86       | 0.8654 | 0.9279 | 0.8090 | 0.9166 | 0.8570 |        |        |        | 0.596  | 0.469  | 540   |        |        |        |        | 0.8609 |
|      |         | PTRN     | 80       | 0.8318 | 0.9058 | 0.8323 | 0.9121 | 0.8190 |        |        |        | 0.718  | 0.569  | 386   |        |        |        |        | 0.8163 |
|      |         | CAL      | 43       | 0.7060 | 0.7601 | 0.8402 | 0.8301 | 0.6733 | 0.5843 | 0.2143 | 0.7062 | 0.904  | 0.722  | 98    | 0.4352 | 0.3251 |        |        | 0.6902 |
|      |         | VAL      | 93       | 0.8083 | 0.8711 | 0.8911 | 0.9073 | 0.7898 |        |        |        | 0.8603 | 0.7045 | 383   | 0.7254 | 0.1014 | 0.0130 |        |        |
| TF2  |         | ATR<br>N | 86       | 0.9786 | 0.9892 | 0.7470 | 0.9844 | 0.9776 |        |        |        | 0.238  | 0.156  | 3842  |        |        |        |        | 0.9730 |
|      |         | PTRN     | 80       | 0.9546 | 0.9761 | 0.8704 | 0.9667 | 0.9526 |        |        |        | 0.370  | 0.256  | 1641  |        |        |        |        | 0.9529 |
|      |         | CAL      | 43       | 0.9124 | 0.9289 | 0.5774 | 0.9727 | 0.9009 | 0.9098 | 0.8295 | 0.9362 | 0.421  | 0.317  | 427   | 0.7824 | 0.1000 |        |        | 0.8968 |
|      |         | VAL      | 93       | 0.9085 | 0.9432 | 0.5673 | 0.9365 | 0.9046 |        |        |        | 0.5763 | 0.4287 | 902   | 0.8661 | 0.0266 | 0.0124 |        |        |
| TF3  |         | ATR<br>N | 86       | 0.8374 | 0.9115 | 0.7957 | 0.9114 | 0.8228 |        |        |        | 0.655  | 0.509  | 433   |        |        |        |        | 0.8326 |

|         |          |          |        |        |        |        |        |        |        |        |        |        |        |        |        |        |        |        |
|---------|----------|----------|--------|--------|--------|--------|--------|--------|--------|--------|--------|--------|--------|--------|--------|--------|--------|--------|
|         |          | PTRN     | 80     | 0.8280 | 0.8962 | 0.6783 | 0.9205 | 0.8151 |        |        |        | 0.716  | 0.567  | 376    |        |        |        | 0.8244 |
|         |          | CAL      | 43     | 0.6441 | 0.7355 | 0.8025 | 0.8393 | 0.6018 | 0.5869 | 0.2192 | 0.7081 | 0.901  | 0.722  | 74     | 0.4614 | 0.3091 |        | 0.6358 |
|         |          | VAL      | 93     | 0.8087 | 0.8539 | 0.7803 | 0.9118 | 0.7926 |        |        |        | 0.8691 | 0.7122 | 385    | 0.6551 | 0.1911 | 0.0129 |        |
| Split 8 | TF0      | ATR<br>N | 83     | 0.9903 | 0.9952 | 0.9257 | 0.9920 | 0.9900 |        |        |        | 0.167  | 0.107  | 8311   |        |        |        | 0.9859 |
|         |          | PTRN     | 73     | 0.9607 | 0.9738 | 0.6846 | 0.9673 | 0.9591 |        |        |        | 0.440  | 0.325  | 1735   |        |        |        | 0.9551 |
|         |          | CAL      | 59     | 0.6252 | 0.7559 | 0.3521 | 0.7836 | 0.5524 | 0.3482 | 0.3386 | 0.4858 | 1.26   | 0.749  | 95     | 0.4524 | 0.3070 |        | 0.6198 |
|         |          | VAL      | 87     | 0.8770 | 0.9267 | 0.7052 | 0.9321 | 0.8662 |        |        |        | 0.5943 | 0.4175 | 602    | 0.7502 | 0.1292 | 0.0119 |        |
|         | TF1      | ATR<br>N | 83     | 0.8212 | 0.9018 | 0.7652 | 0.8985 | 0.8101 |        |        |        | 0.721  | 0.561  | 372    |        |        |        | 0.8180 |
|         |          | PTRN     | 73     | 0.8218 | 0.9014 | 0.8229 | 0.9000 | 0.8052 |        |        |        | 0.815  | 0.625  | 327    |        |        |        | 0.8097 |
|         |          | CAL      | 59     | 0.7826 | 0.8840 | 0.8846 | 0.9041 | 0.7582 | 0.7799 | 0.7766 | 0.8264 | 0.733  | 0.591  | 205    | 0.6922 | 0.0595 |        | 0.7751 |
|         |          | VAL      | 87     | 0.7522 | 0.8625 | 0.8338 | 0.8885 | 0.7272 |        |        |        | 0.7404 | 0.5799 | 258    | 0.6519 | 0.0715 | 0.0151 |        |
|         | TF2      | ATR<br>N | 83     | 0.9817 | 0.9907 | 0.9672 | 0.9853 | 0.9808 |        |        |        | 0.231  | 0.156  | 4336   |        |        |        | 0.9762 |
|         |          | PTRN     | 73     | 0.9509 | 0.9713 | 0.5904 | 0.9637 | 0.9485 |        |        |        | 0.450  | 0.319  | 1375   |        |        |        | 0.9433 |
|         |          | CAL      | 59     | 0.9080 | 0.9509 | 0.8728 | 0.9655 | 0.8972 | 0.8983 | 0.8968 | 0.9198 | 0.498  | 0.408  | 562    | 0.8609 | 0.0876 |        | 0.9012 |
|         |          | VAL      | 87     | 0.9031 | 0.9478 | 0.5651 | 0.9485 | 0.8953 |        |        |        | 0.4817 | 0.3752 | 812    | 0.8387 | 0.0940 | 0.0124 |        |
| TF3     | ATR<br>N | 83       | 0.8129 | 0.8968 | 0.5951 | 0.8964 | 0.8016 |        |        |        | 0.737  | 0.566  | 352    |        |        |        | 0.8080 |        |
|         | PTRN     | 73       | 0.8130 | 0.8980 | 0.7012 | 0.9011 | 0.7979 |        |        |        | 0.829  | 0.650  | 309    |        |        |        | 0.8028 |        |
|         | CAL      | 59       | 0.7717 | 0.8779 | 0.8784 | 0.9112 | 0.7471 | 0.7571 | 0.7535 | 0.8084 | 0.770  | 0.615  | 193    | 0.6783 | 0.0185 |        | 0.7594 |        |
|         | VAL      | 87       | 0.6962 | 0.8302 | 0.8285 | 0.8709 | 0.6709 |        |        |        | 0.8561 | 0.6647 | 196    | 0.5809 | 0.0463 | 0.6709 |        |        |
| Split 9 | TF0      | ATR<br>N | 91     | 0.9901 | 0.9950 | 0.7134 | 0.9922 | 0.9896 |        |        |        | 0.180  | 0.120  | 8857   |        |        |        | 0.9851 |
|         |          | PTRN     | 71     | 0.9901 | 0.9748 | 0.1331 | 0.9929 | 0.9892 |        |        |        | 0.354  | 0.297  | 6924   |        |        |        | 0.9861 |
|         |          | CAL      | 52     | 0.7115 | 0.8345 | 0.8400 | 0.8405 | 0.6798 | 0.6151 | 0.6140 | 0.7748 | 0.803  | 0.567  | 123    | 0.5935 | 0.2002 |        | 0.6935 |
|         |          | VAL      | 88     | 0.8945 | 0.9287 | 0.6149 | 0.9274 | 0.8885 |        |        |        | 0.6820 | 0.5083 | 729    | 0.8202 | 0.1026 | 0.0097 |        |
|         | TF1      | ATR<br>N | 91     | 0.8114 | 0.8959 | 0.6756 | 0.9106 | 0.7954 |        |        |        | 0.784  | 0.618  | 383    |        |        |        | 0.8023 |
|         |          | PTRN     | 71     | 0.8234 | 0.8836 | 0.8042 | 0.9314 | 0.8030 |        |        |        | 0.735  | 0.615  | 322    |        |        |        | 0.8164 |
|         |          | CAL      | 52     | 0.7207 | 0.8401 | 0.8488 | 0.8870 | 0.6877 | 0.6341 | 0.6331 | 0.7859 | 0.783  | 0.621  | 129    | 0.6069 | 0.1750 |        | 0.7117 |
|         |          | VAL      | 88     | 0.7868 | 0.8581 | 0.8705 | 0.9083 | 0.7625 |        |        |        | 0.8715 | 0.7060 | 317    | 0.6807 | 0.1912 | 0.0095 |        |
| TF2     | ATR<br>N | 91       | 0.9828 | 0.9913 | 0.7435 | 0.9873 | 0.9821 |        |        |        | 0.236  | 0.163  | 5099   |        |        |        | 0.9711 |        |

|     |          |    |        |        |        |        |        |        |        |        |        |        |      |        |        |        |        |
|-----|----------|----|--------|--------|--------|--------|--------|--------|--------|--------|--------|--------|------|--------|--------|--------|--------|
| TF3 | PTRN     | 71 | 0.9830 | 0.9797 | 0.4955 | 0.9889 | 0.9812 |        |        |        | 0.313  | 0.264  | 3999 |        |        |        | 0.9778 |
|     | CAL      | 52 | 0.8898 | 0.9395 | 0.9119 | 0.9602 | 0.8794 | 0.8696 | 0.8693 | 0.9237 | 0.467  | 0.392  | 404  | 0.8274 | 0.1050 |        | 0.8813 |
|     | VAL      | 88 | 0.9173 | 0.9501 | 0.6652 | 0.9431 | 0.9142 |        |        |        | 0.5463 | 0.4355 | 954  | 0.8787 | 0.0202 | 0.0097 |        |
|     | ATR<br>N | 91 | 0.8221 | 0.9023 | 0.8122 | 0.9220 | 0.8063 |        |        |        | 0.761  | 0.584  | 411  |        |        |        | 0.8100 |
|     | PTRN     | 71 | 0.8215 | 0.8930 | 0.5411 | 0.9190 | 0.8019 |        |        |        | 0.712  | 0.558  | 318  |        |        |        | 0.8166 |
|     | CAL      | 52 | 0.7400 | 0.8505 | 0.8602 | 0.8890 | 0.7117 | 0.6548 | 0.6538 | 0.7980 | 0.760  | 0.618  | 142  | 0.6308 | 0.1912 |        | 0.7245 |
|     | VAL      | 88 | 0.7904 | 0.8721 | 0.8124 | 0.9129 | 0.7688 |        |        |        | 0.8260 | 0.6476 | 324  | 0.6975 | 0.1855 | 0.7688 |        |

**Table S3.** The name, reaction temperature (K), quasi-SMILES, the set (active training (+), passive training set (-), calibration set (#), validation set (\*)), experimental  $\log_{K_{O_3}}$ , and predicted  $\log_{K_{O_3}}$  of VOCs of split 1 based on TF2

| No. | SMILES                          | Experimental<br>  $\log_{K_{O_3}}$ | Split |   |   |   |   |   |   |   |   |
|-----|---------------------------------|------------------------------------|-------|---|---|---|---|---|---|---|---|
|     |                                 |                                    | 1     | 2 | 3 | 4 | 5 | 6 | 7 | 8 | 9 |
| 1   | <chem>CC(C)C1CC=C(C)C=C1</chem> | -13.92                             | +     | - | + | # | # | + | + | # | + |
| 2   | <chem>C1C2C=CC1C=C2</chem>      | -14.33                             | #     | + | - | # | - | - | # | + | - |
| 3   | <chem>C1CC2CC1C=C2</chem>       | -14.67                             | *     | - | * | - | - | * | * | * | * |
| 4   | <chem>CC(C)=CCC=C(C)C=C</chem>  | -14.7                              | *     | * | * | # | - | * | * | * | * |
| 5   | <chem>C1CC=CC=C1</chem>         | -14.71                             | +     | # | - | - | - | + | + | - | + |
| 6   | <chem>CC(C)=C(C)C</chem>        | -14.85                             | +     | * | + | + | * | + | + | - | + |
| 7   | <chem>CC(C)=CCCC(=C)C=C</chem>  | -14.9                              | #     | * | - | + | - | - | # | - | + |
| 8   | <chem>CC(C)=C(C)C</chem>        | -14.98                             | *     | # | * | - | - | * | * | * | * |
| 9   | <chem>C1CC=CC1</chem>           | -15.01                             | #     | * | # | * | * | # | # | * | # |
| 10  | <chem>CC(=C(C)C)C</chem>        | -15.05                             | #     | + | # | - | + | # | # | + | # |
| 11  | <chem>CC(C)=C(C)C</chem>        | -15.08                             | +     | * | * | # | - | + | * | * | + |
| 12  | <chem>CC(C)=C(C)C</chem>        | -15.08                             | -     | + | * | * | * | * | - | * | * |
| 13  | <chem>C1CC=CC1</chem>           | -15.09                             | *     | + | * | + | * | * | * | + | * |
| 14  | <chem>CC1=CCCC1</chem>          | -15.17                             | -     | # | * | * | # | * | * | - | * |
| 15  | <chem>CC(=C)C1CCC(=CC1)C</chem> | -15.19                             | +     | + | + | + | + | + | + | + | # |

|    |                     |        |   |   |   |   |   |   |   |   |   |
|----|---------------------|--------|---|---|---|---|---|---|---|---|---|
| 16 | CC(CCC=C(C)C)C=C    | -15.2  | # | - | # | - | + | # | # | - | # |
| 17 | CC\C(C)=C\C         | -15.25 | - | * | - | * | + | - | - | - | - |
| 18 | CC(C)C1CCC(=CC1)C   | -15.28 | * | * | * | - | # | * | * | # | * |
| 19 | CC\C(C)=C/C         | -15.34 | + | - | + | * | * | + | + | * | + |
| 20 | CC(C)=CCCC(C)(O)C=C | -15.37 | - | - | - | * | - | - | - | # | - |
| 21 | CC=C(C)C            | -15.4  | + | * | + | # | + | + | + | - | + |
| 22 | CC(C)=CCCC(C)=O     | -15.41 | - | - | - | # | + | - | - | - | - |
| 23 | C\C=C/C=C\C         | -15.43 | # | - | # | * | + | # | # | # | # |
| 24 | C\C=C/C=C/C         | -15.43 | * | + | * | - | - | * | * | - | * |
| 25 | CC=C(C)C            | -15.48 | # | + | # | * | * | # | # | + | # |
| 26 | C\C=C/C=C/C         | -15.5  | - | + | - | + | * | - | - | * | - |
| 27 | C1CCC=CCC1          | -15.5  | * | # | * | * | * | * | * | - | * |
| 28 | CC/C=C/C            | -15.5  | * | - | * | - | # | * | * | - | * |
| 29 | C\C=C/C             | -15.56 | - | * | - | * | * | - | - | * | - |
| 30 | C\C=C\C             | -15.56 | * | * | * | + | - | * | * | + | * |
| 31 | C\C=C\C             | -15.59 | # | * | # | * | # | - | # | + | - |
| 32 | CC=CCO              | -15.6  | # | * | # | - | - | + | # | + | + |
| 33 | CC1=C(C)CCCC1       | -15.68 | * | # | * | + | * | * | * | # | * |
| 34 | CC\C=C/C            | -15.68 | * | - | * | + | * | * | * | # | * |
| 35 | C1CCC=CC1           | -15.69 | # | # | # | * | # | + | # | # | + |
| 36 | C\C=C\C             | -15.69 | * | + | * | + | + | * | * | + | * |
| 37 | CC=C(C)C            | -15.71 | * | + | * | * | # | * | * | * | * |
| 38 | C\C=C\C             | -15.71 | * | # | * | - | - | * | * | * | * |
| 39 | CC(C)C1CCC(=C)C=C1  | -15.75 | - | + | - | # | + | - | - | + | - |
| 40 | CC1=CCCCC1          | -15.78 | # | + | # | * | * | + | # | * | + |
| 41 | CC\C=C\CC           | -15.8  | # | - | # | * | + | - | # | + | - |
| 42 | C1CC=CC=CC1         | -15.81 | - | * | - | + | * | - | - | + | - |
| 43 | CCOC=C              | -15.81 | - | + | + | # | * | - | - | # | - |
| 44 | CC(=O)C1CCC(=CC1)C  | -15.82 | + | - | - | - | + | + | + | - | - |
| 45 | CC(C)=CC(C)(C)C     | -15.85 | + | + | + | - | + | + | + | + | - |

|    |               |        |   |   |   |   |   |   |   |   |   |
|----|---------------|--------|---|---|---|---|---|---|---|---|---|
| 46 | CC\C=C/CC     | -15.85 | * | * | * | * | - | * | * | # | * |
| 47 | C\C=C/C       | -15.86 | * | * | * | + | - | * | * | + | * |
| 48 | C\C=C/C       | -15.86 | * | # | * | + | - | * | * | + | * |
| 49 | C\C=C/C       | -15.86 | # | + | # | * | # | + | # | # | - |
| 50 | C\C=C/C       | -15.86 | + | + | - | - | # | + | + | + | - |
| 51 | C\C=C/C       | -15.87 | * | * | * | * | # | * | * | + | * |
| 52 | CCC\C=C\CCC   | -15.88 | # | + | - | * | + | + | # | - | - |
| 53 | C\C=C/C       | -15.9  | + | - | + | * | * | + | + | + | + |
| 54 | CC\C=C\CC     | -15.91 | - | - | - | * | - | - | - | - | - |
| 55 | CCCC\C=C\CCCC | -15.94 | * | * | * | * | + | * | * | * | * |
| 56 | C\C=C\C       | -15.94 | - | - | - | * | + | - | - | * | - |
| 57 | C\C=C\C       | -15.94 | + | * | + | + | - | + | + | + | + |
| 58 | C\C=C\C       | -15.94 | # | # | # | + | * | # | # | # | # |
| 59 | C\C=C\C       | -15.94 | # | + | + | * | # | # | # | * | + |
| 60 | C1CCC=CC1     | -15.98 | * | # | * | + | + | * | * | * | * |
| 61 | CCC\C=C\CCC   | -16    | + | # | + | * | # | + | + | * | + |
| 62 | C\C=C\C       | -16.03 | - | + | - | * | * | - | - | * | + |
| 63 | CCCCC=CC      | -16.06 | - | # | - | - | + | - | - | - | - |
| 64 | C\C=C/C       | -16.06 | * | # | * | + | * | * | * | - | * |
| 65 | C\C=C/C       | -16.06 | - | - | + | + | # | - | - | # | - |
| 66 | CC1CCC=CC1    | -16.09 | + | # | + | * | - | + | + | # | + |
| 67 | C\C=C\C(=C)C  | -16.1  | + | - | + | # | - | + | + | - | + |
| 68 | CC=CC(C)=C    | -16.1  | * | * | * | * | * | * | * | + | * |
| 69 | C1C=CCC=C1    | -16.19 | + | * | + | + | # | + | + | + | + |
| 70 | C\C=C\C       | -16.22 | # | - | # | - | - | # | # | + | # |
| 71 | C\C=C\C       | -16.23 | + | + | + | # | - | + | + | - | + |
| 72 | C1C=CC=CC=C1  | -16.27 | # | + | # | + | + | # | # | - | # |
| 73 | C\C=C/C       | -16.28 | * | - | * | + | + | * | * | + | * |
| 74 | C\C=C/C       | -16.31 | - | * | - | * | + | - | - | * | - |
| 75 | C\C=C/C       | -16.33 | - | - | - | + | + | - | - | + | - |



|     |                     |        |   |   |   |   |   |   |   |   |   |
|-----|---------------------|--------|---|---|---|---|---|---|---|---|---|
| 76  | C/C=C/C=C           | -16.37 | + | * | + | - | - | + | + | - | + |
| 77  | CC/C=C/C(C)(C)C     | -16.39 | * | - | * | + | - | * | * | * | * |
| 78  | CC(C)\C=C\C(C)C     | -16.41 | # | * | # | + | * | # | # | + | # |
| 79  | CC=C                | -16.42 | * | * | * | # | + | * | * | - | * |
| 80  | CC(C)\C=C\C(C)C     | -16.42 | # | + | # | + | * | # | # | + | # |
| 81  | CC1(C)C2CCC(=C)C1C2 | -16.44 | * | - | * | # | - | * | * | * | * |
| 82  | CC/C=C/C(C)(C)C     | -16.44 | + | - | + | * | # | + | + | - | + |
| 83  | C=Cc1ccccc1         | -16.52 | + | + | + | + | - | + | + | * | + |
| 84  | CCC=C               | -16.55 | - | * | - | + | * | - | - | # | - |
| 85  | C=CC=CC=C           | -16.58 | + | * | + | * | # | + | + | # | + |
| 86  | CC(=C)C(C)=C        | -16.58 | * | + | * | # | * | * | * | * | * |
| 87  | CCC/C=C/COC(C)=O    | -16.61 | + | + | + | - | + | + | + | - | + |
| 88  | CC=CC(C)=O          | -16.67 | # | * | # | - | - | # | # | - | # |
| 89  | C=Cc1ccccc1         | -16.67 | * | * | * | + | + | * | * | * | * |
| 90  | CC1(C)C2CCC(=C)C1C2 | -16.68 | + | - | + | # | # | + | + | - | + |
| 91  | CCC(O)C=C           | -16.75 | * | * | * | - | # | * | * | - | * |
| 92  | CC(=C)C=C           | -16.75 | # | + | # | * | * | # | # | * | # |
| 93  | CCCCCC=C            | -16.76 | + | * | + | * | * | + | + | + | + |
| 94  | CCCC(C)=C           | -16.77 | * | + | * | + | - | * | * | - | * |
| 95  | CC(O)C=C            | -16.79 | + | - | + | * | # | + | + | - | + |
| 96  | C1OCC=C1            | -16.79 | # | - | # | # | + | # | # | + | # |
| 97  | CCC(C)=C            | -16.8  | + | + | + | # | * | + | + | * | + |
| 98  | [nH]1ccccc1         | -16.8  | - | - | - | - | + | - | - | - | - |
| 99  | CC(C)=C             | -16.84 | # | # | # | + | * | # | # | * | # |
| 100 | C=Cc1ccccc1         | -16.84 | - | + | - | - | - | - | - | + | - |
| 101 | CC(=C)CCC(C)=C      | -16.85 | # | - | # | - | # | # | # | + | # |
| 102 | CC(=C)C=C           | -16.85 | + | # | + | + | - | + | + | + | + |
| 103 | CC=C                | -16.85 | # | + | # | + | * | # | # | * | # |
| 104 | CCC=C               | -16.86 | * | # | * | * | - | * | * | - | * |
| 105 | CCC(=C)CC           | -16.86 | * | * | * | # | + | * | * | # | * |

|     |               |        |   |   |   |   |   |   |   |   |   |
|-----|---------------|--------|---|---|---|---|---|---|---|---|---|
| 106 | CC(C)=C       | -16.87 | * | # | * | # | + | * | * | + | * |
| 107 | CC(=C)CC=C    | -16.89 | - | - | - | - | * | - | - | + | - |
| 108 | CC=C          | -16.89 | * | + | * | * | * | * | * | * | * |
| 109 | CCCCCCC=C     | -16.9  | + | # | + | - | * | + | + | * | + |
| 110 | CC(=C)C=C     | -16.9  | - | - | - | - | * | - | - | * | - |
| 111 | CCCC(C)=C     | -16.9  | - | # | - | + | - | - | - | * | - |
| 112 | CC=C          | -16.9  | * | + | * | # | - | * | * | # | * |
| 113 | CC=C          | -16.9  | # | # | # | - | + | # | # | # | # |
| 114 | CN(C)N(C)C    | -16.9  | - | - | - | + | - | - | - | # | - |
| 115 | CCC=C         | -16.91 | # | * | # | + | * | # | # | * | # |
| 116 | CC(C)=C       | -16.92 | + | * | + | - | # | + | + | + | + |
| 117 | CCCC=C        | -16.95 | + | - | + | - | # | + | + | + | + |
| 118 | CCCC=C        | -16.96 | # | + | # | * | # | # | # | - | # |
| 119 | CC(C)C=C      | -16.96 | - | # | - | - | - | - | - | + | - |
| 120 | CCCC=C        | -16.97 | + | # | + | * | + | + | + | * | + |
| 121 | CCCC=C        | -16.97 | * | * | * | # | # | * | * | + | * |
| 122 | CC(C)CC=C     | -16.98 | - | * | - | * | * | - | - | # | - |
| 123 | CC=C          | -16.98 | # | * | # | + | + | # | # | - | # |
| 124 | CCC=C         | -16.99 | + | + | + | + | # | + | + | - | + |
| 125 | CC(C)C(C)=C   | -17    | * | + | * | * | + | * | * | * | * |
| 126 | CC(C)(O)C=C   | -17    | + | * | + | + | - | + | + | # | + |
| 127 | CCCC=C        | -17.01 | * | - | * | # | - | * | * | * | * |
| 128 | CN(C)C        | -17.01 | - | - | - | # | # | - | - | + | - |
| 129 | CCCCCC=C      | -17.03 | + | * | + | * | # | + | + | + | + |
| 130 | C=C           | -17.04 | * | + | * | + | * | * | * | - | * |
| 131 | COC(=O)C(C)=C | -17.12 | * | # | + | # | # | * | * | - | * |
| 132 | C=CC1CCCC1    | -17.12 | + | - | + | # | - | + | + | # | + |
| 133 | CCC=C         | -17.13 | - | * | - | + | + | - | - | * | - |
| 134 | CC=C          | -17.13 | # | * | # | * | + | # | # | # | # |
| 135 | CC(C)CC=C     | -17.14 | + | * | + | + | - | + | + | * | + |

|     |                 |        |   |   |   |   |   |   |   |   |   |
|-----|-----------------|--------|---|---|---|---|---|---|---|---|---|
| 136 | CC(=C)C=C       | -17.16 | + | * | + | # | * | + | + | * | + |
| 137 | C=CC=C          | -17.17 | + | * | + | + | * | + | + | + | + |
| 138 | CCC(=O)C=C      | -17.22 | + | # | + | - | # | + | + | * | + |
| 139 | CCOC(=O)C=C     | -17.24 | - | - | - | * | + | - | - | - | - |
| 140 | CC(Cl)C=C       | -17.27 | - | # | - | + | + | - | - | + | - |
| 141 | CC=C            | -17.29 | * | * | * | # | * | * | * | - | * |
| 142 | CC(C)=C         | -17.3  | * | - | * | * | # | * | * | * | * |
| 143 | OCCC=C          | -17.31 | + | - | + | + | + | + | + | # | + |
| 144 | CCC(C)C=C       | -17.31 | # | + | # | + | * | # | # | # | # |
| 145 | CCC=C           | -17.32 | * | * | * | * | - | * | * | - | * |
| 146 | CC(=O)C=C       | -17.32 | + | * | + | - | # | + | + | # | + |
| 147 | CC(Cl)C=C       | -17.35 | + | - | + | * | - | + | + | * | + |
| 148 | COC(=O)\C=C\C   | -17.36 | - | + | - | # | * | - | - | - | - |
| 149 | C=C             | -17.42 | # | + | # | + | + | # | # | # | # |
| 150 | CC(C)=C         | -17.44 | # | # | # | + | + | # | # | * | # |
| 151 | CC(Cl)C=C       | -17.44 | # | * | # | # | * | # | # | * | # |
| 152 | CC(C)C(=C)C(C)C | -17.48 | # | * | # | # | + | # | # | # | # |
| 153 | CCC=C           | -17.5  | + | + | + | # | * | + | + | + | + |
| 154 | CC(=O)OC=C      | -17.5  | + | + | + | # | - | + | + | + | + |
| 155 | CNC             | -17.58 | + | + | + | * | + | + | + | + | + |
| 156 | CC(Cl)C=C       | -17.59 | # | # | # | * | * | # | # | - | # |
| 157 | o1cccc1         | -17.62 | - | # | - | - | - | - | - | - | - |
| 158 | C=C             | -17.63 | - | + | - | * | * | - | - | + | - |
| 159 | C=C             | -17.64 | - | - | - | # | + | - | - | + | - |
| 160 | O=C\C=C\c1cccc1 | -17.66 | + | * | + | - | - | + | + | * | + |
| 161 | CC=C            | -17.68 | * | * | * | * | - | * | * | # | * |
| 162 | CC(Cl)=C        | -17.7  | * | - | * | * | - | * | * | # | * |
| 163 | CCC/C=C/C=O     | -17.7  | + | - | + | - | + | + | + | * | + |
| 164 | CC(C)=C         | -17.71 | # | + | # | - | + | # | # | * | # |
| 165 | C=C             | -17.76 | + | # | + | # | # | + | + | - | + |

|     |                 |        |   |   |   |   |   |   |   |   |   |
|-----|-----------------|--------|---|---|---|---|---|---|---|---|---|
| 166 | CCC=C           | -17.77 | * | + | * | + | # | * | * | * | * |
| 167 | C=C             | -17.78 | - | - | - | * | * | - | - | * | - |
| 168 | C=C             | -17.8  | # | + | # | - | + | # | # | * | # |
| 169 | CC(Cl)=C        | -17.81 | * | - | * | * | - | * | * | * | * |
| 170 | C=C             | -17.81 | - | - | - | + | * | - | - | * | - |
| 171 | C=C             | -17.85 | - | * | - | * | # | - | - | # | - |
| 172 | C=C             | -17.86 | * | # | * | * | * | * | * | * | * |
| 173 | C=C             | -17.91 | # | + | - | + | * | # | - | + | # |
| 174 | C=C             | -17.94 | - | * | - | # | * | - | - | - | - |
| 175 | CC(=C)C=O       | -17.95 | * | - | * | * | * | * | * | * | * |
| 176 | CCC(=C)C=O      | -17.97 | + | * | + | * | * | + | + | + | + |
| 177 | C=C             | -18.03 | * | * | * | - | * | * | * | * | * |
| 178 | C/C=C/C=O       | -18.05 | * | * | * | # | # | * | * | * | * |
| 179 | C/C=C/C=O       | -18.05 | + | * | + | - | # | + | + | # | + |
| 180 | FC=C            | -18.16 | # | + | # | * | - | # | # | # | # |
| 181 | ClC/C=C/Cl      | -18.17 | - | - | - | - | # | - | - | + | - |
| 182 | CC(Cl)=C        | -18.21 | + | * | + | * | + | + | + | * | + |
| 183 | ClC(Cl)=C(Cl)Cl | -18.23 | # | - | # | - | - | # | # | + | # |
| 184 | C=C             | -18.24 | - | * | - | - | * | - | - | # | - |
| 185 | Cl\C=C\Cl       | -18.25 | * | # | * | # | - | * | * | * | * |
| 186 | Cl\C=C\Cl       | -18.35 | - | # | - | * | - | - | - | + | - |
| 187 | C=C             | -18.36 | * | * | * | + | # | * | * | + | * |
| 188 | ClCC(=C)CCl     | -18.41 | # | * | # | * | + | # | # | - | # |
| 189 | ClC(Cl)=C(Cl)Cl | -18.45 | * | + | * | + | + | * | * | # | * |
| 190 | Cl\C=C\Cl       | -18.45 | # | * | # | - | * | # | # | + | # |
| 191 | Cc1cccc(O)c1    | -18.5  | + | - | + | * | * | + | + | + | + |
| 192 | ClC=C(Cl)Cl     | -18.51 | * | - | + | * | - | * | * | - | * |
| 193 | C=CC=O          | -18.55 | * | - | * | * | + | * | * | * | * |
| 194 | C=CC=O          | -18.59 | + | + | + | # | + | + | + | + | + |
| 195 | Cc1cccc1O       | -18.59 | - | + | - | # | + | - | - | + | - |

|     |                 |        |   |   |   |   |   |   |   |   |   |
|-----|-----------------|--------|---|---|---|---|---|---|---|---|---|
| 196 | CIC=C           | -18.61 | * | # | * | * | + | * | * | - | * |
| 197 | C=C             | -18.65 | * | + | * | + | + | * | * | - | * |
| 198 | O=C1OCC=C1      | -18.66 | - | - | - | * | - | - | - | # | - |
| 199 | CCON=O          | -18.67 | * | # | * | * | + | * | * | - | * |
| 200 | c1ccc2ccccc2c1  | -18.7  | + | + | + | + | # | + | + | # | + |
| 201 | CON=O           | -18.71 | - | - | - | * | * | - | - | - | - |
| 202 | FC(F)=C         | -18.72 | - | * | - | + | * | - | - | * | - |
| 203 | CC(Cl)=C        | -18.72 | - | * | - | - | - | - | - | * | - |
| 204 | Cl\C=C\Cl       | -18.75 | # | - | + | * | * | # | + | + | # |
| 205 | CCON=O          | -18.8  | - | + | - | # | - | - | - | - | - |
| 206 | CIC(Cl)=C(Cl)Cl | -18.8  | - | + | - | + | # | - | - | - | - |
| 207 | CIC\C=C/Cl      | -18.82 | # | * | + | + | * | # | + | * | # |
| 208 | CIC=C(Cl)Cl     | -18.83 | - | # | - | - | # | - | - | * | - |
| 209 | FC=C            | -18.85 | + | - | + | # | * | + | + | + | + |
| 210 | C=C             | -18.86 | * | # | * | # | * | * | * | - | * |
| 211 | CC(Cl)=C        | -18.96 | # | + | + | * | * | # | + | + | # |
| 212 | CC#N            | -19    | + | - | + | # | - | + | + | * | + |
| 213 | CIC=C(Cl)Cl     | -19.02 | + | + | + | - | * | + | + | * | + |
| 214 | Cl\C=C\Cl       | -19.05 | * | + | * | + | * | * | * | # | * |
| 215 | CIC(Cl)=C(Cl)Cl | -19.06 | * | - | * | * | * | * | * | # | * |
| 216 | Cl\C=C/Cl       | -19.13 | * | * | * | # | * | * | * | * | * |
| 217 | C=C             | -19.14 | + | - | + | # | + | + | + | - | + |
| 218 | C=C             | -19.35 | * | * | * | - | - | * | * | # | * |
| 219 | C=C             | -19.37 | # | # | + | * | * | # | + | - | # |
| 220 | CIC(Cl)=C(Cl)Cl | -19.37 | + | + | + | # | + | + | + | - | + |
| 221 | ClCc1ccccc1     | -19.4  | + | * | + | - | - | + | + | - | + |
| 222 | Cl\C=C/Cl       | -19.45 | # | * | - | - | * | # | - | # | # |
| 223 | CC=O            | -19.47 | # | * | - | # | * | # | - | - | # |
| 224 | CON=O           | -19.51 | # | # | - | - | * | # | - | * | # |
| 225 | CIC=C(Cl)Cl     | -19.61 | # | # | - | * | * | # | - | - | # |

|     |                    |        |   |   |   |   |   |   |   |   |   |
|-----|--------------------|--------|---|---|---|---|---|---|---|---|---|
| 226 | Cl\C=C/Cl          | -19.62 | - | # | - | * | - | - | - | - | - |
| 227 | FC=C(F)F           | -19.62 | + | # | + | + | * | + | + | + | + |
| 228 | C=C                | -19.74 | * | - | + | * | - | * | * | # | * |
| 229 | Cl\C=C/Cl          | -19.79 | # | - | - | # | # | # | - | * | # |
| 230 | ClC(Cl)=C(Cl)Cl    | -19.81 | + | - | + | + | - | + | + | * | + |
| 231 | CON=O              | -19.89 | - | - | - | + | + | - | - | - | + |
| 232 | C=C                | -19.97 | - | + | - | # | # | - | - | + | + |
| 233 | Cl\C=C/Cl          | -20.04 | - | * | - | - | + | - | - | * | + |
| 234 | C=C                | -20.16 | - | # | - | - | + | - | - | # | + |
| 235 | C=C                | -20.3  | + | - | + | - | - | + | + | + | + |
| 236 | ClC(Cl)=C          | -20.43 | - | - | - | # | # | - | - | + | - |
| 237 | O=CC=O             | -20.5  | + | * | + | + | + | + | + | - | + |
| 238 | CC(C)C             | -22.7  | * | + | * | * | * | * | * | # | * |
| 239 | CC                 | -23    | # | * | - | # | # | # | - | - | + |
| 240 | CCCC               | -23    | * | * | + | # | + | * | * | + | * |
| 241 | CC(F)F             | -24.2  | * | - | + | # | # | * | * | - | * |
| 242 | CC(F)(F)F          | -25.3  | + | * | - | - | # | + | + | + | + |
| 243 | CC(C)=C1CCC(=CC1)C | -14    | * | + | + | + | # | * | * | * | * |
| 244 | CC(C)=CCCC(=C)C=C  | -14.9  | + | - | - | # | # | + | + | # | + |
| 245 | CC=C(C)C           | -15.17 | - | * | - | # | * | - | - | - | - |
| 246 | C1CC=CC1           | -15.24 | + | # | - | + | - | + | + | + | + |
| 247 | C\C=C\C            | -15.41 | * | + | * | * | * | * | * | * | * |
| 248 | CC(C)=CCCC(C)=O    | -15.47 | * | * | * | - | # | * | * | # | * |
| 249 | C\C=C\C            | -15.58 | * | + | * | + | # | * | * | # | * |
| 250 | CC=C(C)C           | -15.65 | - | * | - | + | + | - | - | + | - |
| 251 | C\C=C/C            | -15.71 | * | + | * | * | + | * | * | # | * |
| 252 | C1CCC=CC1          | -15.8  | + | - | # | * | - | + | + | # | + |
| 253 | CC\C=C/CC          | -15.84 | # | - | - | + | + | # | - | * | # |
| 254 | CC(=CC(C)(C)C)C    | -15.86 | - | + | - | # | - | - | - | * | - |
| 255 | CCCC\C=C\CCCC      | -15.89 | + | - | + | * | # | + | + | - | + |

|     |                          |        |   |   |   |   |   |   |   |   |   |
|-----|--------------------------|--------|---|---|---|---|---|---|---|---|---|
| 256 | C1CCC=CC1                | -15.93 | # | # | # | + | * | # | - | * | # |
| 257 | C\C=C/C                  | -16    | + | * | + | - | - | + | + | - | + |
| 258 | CCC\C=C/CCC              | -16.05 | # | + | - | - | - | # | - | * | # |
| 259 | C1CC2CCC1C=C2            | -16.14 | # | + | - | * | * | # | - | # | # |
| 260 | CC\C=C/CCO               | -16.19 | - | * | - | # | - | - | - | # | - |
| 261 | CC/C=C/C(C)(C)C          | -16.36 | * | # | * | - | + | * | * | + | * |
| 262 | CC/C=C/C(C)(C)C          | -16.4  | + | - | + | * | * | + | + | * | + |
| 263 | CC(C)=C                  | -16.51 | * | # | * | * | - | * | * | + | * |
| 264 | C\C=C/C=C                | -16.56 | * | * | * | + | - | * | * | * | * |
| 265 | CCC/C=C/CO(C)=O          | -16.71 | * | # | * | + | # | * | * | * | * |
| 266 | CC=C                     | -16.75 | + | # | + | - | - | + | + | + | + |
| 267 | C=CCC=C                  | -16.84 | - | * | - | * | + | - | - | * | - |
| 268 | OCC=C                    | -16.84 | * | - | * | - | + | * | * | + | * |
| 269 | CCC(=C)C                 | -16.88 | * | + | * | + | + | * | * | - | * |
| 270 | CCC=C                    | -16.9  | - | + | - | + | + | - | - | * | - |
| 271 | CCC=C                    | -16.91 | * | * | * | + | + | * | * | + | * |
| 272 | CC(C)=C                  | -16.94 | # | - | - | # | # | # | - | + | # |
| 273 | [CH2]=[C]1CC[CH2]CC<br>1 | -16.98 | - | - | - | - | - | - | - | + | - |
| 274 | CC(C)C(=C)C              | -17    | * | * | * | # | # | * | * | - | + |
| 275 | CCCCCCCC=C               | -17.1  | # | * | + | + | - | # | + | + | + |
| 276 | C=CC=C                   | -17.13 | * | * | - | * | - | * | * | # | * |
| 277 | CC(=C)C=C                | -17.24 | * | - | + | - | * | * | * | + | * |
| 278 | CC(C)(C)C=C              | -17.28 | + | + | + | + | + | + | + | # | + |
| 279 | CC=C                     | -17.32 | + | * | # | + | - | + | + | + | + |
| 280 | CC(C)(C)C=C              | -17.41 | * | * | * | - | * | * | * | + | * |
| 281 | CC(Cl)C=C                | -17.56 | # | - | + | # | * | # | + | * | # |
| 282 | C=C                      | -17.59 | * | - | * | * | # | * | * | * | * |
| 283 | CC(Cl)C=C                | -17.7  | + | + | + | - | # | + | + | * | + |
| 284 | C=C                      | -17.74 | - | # | - | - | # | - | - | # | - |

|     |                 |        |   |   |   |   |   |   |   |   |   |
|-----|-----------------|--------|---|---|---|---|---|---|---|---|---|
| 285 | C=C             | -17.85 | - | * | - | * | # | - | - | + | - |
| 286 | O=C1CCCC=C1     | -17.91 | # | # | + | # | - | # | + | # | # |
| 287 | COC(=O)C=C      | -17.98 | + | - | + | + | + | + | + | - | + |
| 288 | Cl\C=C\Cl       | -18.08 | * | + | * | + | + | * | * | + | * |
| 289 | Cc1ccc(O)cc1    | -18.33 | # | # | + | - | * | # | + | * | # |
| 290 | CC(Cl)=C        | -18.4  | - | - | - | # | - | - | - | - | - |
| 291 | Cl\C=C\Cl       | -18.58 | * | - | * | - | * | * | * | # | * |
| 292 | CCON=O          | -18.6  | * | + | * | + | # | * | * | # | * |
| 293 | Cc1cccc(O)c1    | -18.71 | # | + | - | + | + | # | - | * | - |
| 294 | [CH2]=[C]=[CH2] | -18.72 | * | # | * | + | - | * | * | + | + |
| 295 | FC=C(F)F        | -18.85 | * | + | * | - | - | * | * | - | + |
| 296 | CCON=O          | -18.93 | + | * | + | + | * | + | + | # | + |
| 297 | FC(F)=C         | -19.1  | - | * | - | + | - | - | - | + | - |
| 298 | ClC=C(Cl)Cl     | -19.24 | + | - | + | + | - | + | + | - | + |
| 299 | CCN             | -19.56 | # | # | + | + | # | # | - | + | # |
| 300 | C=C             | -19.83 | + | + | - | - | * | + | + | - | + |
| 301 | ClC=C(Cl)Cl     | -19.97 | - | + | - | - | + | - | - | + | - |
| 302 | CCC             | -23.2  | - | + | - | - | * | - | - | * | - |

**Table S3. Continued**

| No. | DCW     |         |         |         |         |         |         |         |         | Predicted log KO3 |         |         |         |         |         |         |         |         |
|-----|---------|---------|---------|---------|---------|---------|---------|---------|---------|-------------------|---------|---------|---------|---------|---------|---------|---------|---------|
|     | Split 1 | Split 2 | Split 3 | Split 4 | Split 5 | Split 6 | Split 7 | Split 8 | Split 9 | Split 1           | Split 2 | Split 3 | Split 4 | Split 5 | Split 6 | Split 7 | Split 8 | Split 9 |
| 1   | 26.07   | 33.41   | 44.45   | 30.92   | 27.41   | 38.38   | 30.75   | 27.24   | 35.67   | -13.93            | -13.54  | -13.93  | -13.85  | -14.20  | -13.92  | -13.92  | -14.59  | -13.92  |
| 2   | 22.77   | 30.03   | 42.01   | 34.62   | 27.69   | 36.87   | 27.24   | 28.10   | 33.70   | -14.97            | -14.40  | -14.37  | -12.89  | -14.12  | -14.29  | -14.81  | -14.35  | -14.40  |
| 3   | 23.34   | 29.15   | 35.66   | 27.56   | 24.97   | 30.94   | 20.53   | 23.72   | 28.93   | -14.79            | -14.62  | -15.52  | -14.73  | -14.87  | -15.72  | -16.52  | -15.59  | -15.56  |
| 4   | 23.32   | 28.68   | 41.04   | 29.15   | 25.00   | 36.74   | 27.20   | 29.02   | 33.66   | -14.80            | -14.74  | -14.54  | -14.31  | -14.86  | -14.32  | -14.82  | -14.08  | -14.41  |
| 5   | 22.50   | 25.74   | 36.70   | 27.04   | 25.59   | 32.46   | 24.96   | 24.11   | 29.26   | -15.06            | -15.49  | -15.33  | -14.86  | -14.70  | -15.35  | -15.39  | -15.48  | -15.48  |
| 6   | 23.60   | 28.28   | 41.02   | 27.68   | 24.71   | 35.60   | 27.57   | 27.62   | 32.38   | -14.71            | -14.84  | -14.55  | -14.70  | -14.94  | -14.59  | -14.73  | -14.48  | -14.72  |
| 7   | 23.96   | 30.67   | 40.18   | 26.72   | 25.16   | 34.37   | 28.11   | 26.70   | 31.83   | -14.60            | -14.24  | -14.70  | -14.95  | -14.82  | -14.89  | -14.59  | -14.74  | -14.86  |



|    |       |       |       |       |       |       |       |       |       |        |        |        |        |        |        |        |        |        |
|----|-------|-------|-------|-------|-------|-------|-------|-------|-------|--------|--------|--------|--------|--------|--------|--------|--------|--------|
| 8  | 22.94 | 25.91 | 40.23 | 27.48 | 25.78 | 34.73 | 26.43 | 26.82 | 31.43 | -14.92 | -15.45 | -14.69 | -14.75 | -14.65 | -14.80 | -15.02 | -14.71 | -14.95 |
| 9  | 20.46 | 24.02 | 36.56 | 24.35 | 22.45 | 30.91 | 23.11 | 24.13 | 28.31 | -15.70 | -15.93 | -15.36 | -15.56 | -15.57 | -15.72 | -15.87 | -15.47 | -15.71 |
| 10 | 20.99 | 24.85 | 36.98 | 24.99 | 23.71 | 32.03 | 24.74 | 24.97 | 28.58 | -15.54 | -15.72 | -15.28 | -15.40 | -15.22 | -15.45 | -15.45 | -15.24 | -15.65 |
| 11 | 21.56 | 23.33 | 37.14 | 25.49 | 23.84 | 32.59 | 24.72 | 24.75 | 29.55 | -15.36 | -16.11 | -15.25 | -15.27 | -15.18 | -15.32 | -15.46 | -15.30 | -15.41 |
| 12 | 22.54 | 27.63 | 38.80 | 27.20 | 24.34 | 33.72 | 24.63 | 25.83 | 30.94 | -15.05 | -15.01 | -14.95 | -14.82 | -15.04 | -15.04 | -15.48 | -14.99 | -15.07 |
| 13 | 21.09 | 25.59 | 36.31 | 24.66 | 22.66 | 31.93 | 23.16 | 25.16 | 28.92 | -15.51 | -15.53 | -15.40 | -15.48 | -15.51 | -15.48 | -15.85 | -15.18 | -15.56 |
| 14 | 21.69 | 24.60 | 36.15 | 22.93 | 21.04 | 30.41 | 21.26 | 24.21 | 27.22 | -15.32 | -15.78 | -15.43 | -15.93 | -15.96 | -15.84 | -16.33 | -15.45 | -15.98 |
| 15 | 22.05 | 26.91 | 37.51 | 25.56 | 23.88 | 33.11 | 25.81 | 28.32 | 30.46 | -15.20 | -15.19 | -15.18 | -15.25 | -15.17 | -15.19 | -15.18 | -14.28 | -15.19 |
| 16 | 24.16 | 29.75 | 41.35 | 26.76 | 25.26 | 38.15 | 28.23 | 27.18 | 34.63 | -14.54 | -14.47 | -14.49 | -14.94 | -14.79 | -13.98 | -14.56 | -14.60 | -14.18 |
| 17 | 21.40 | 27.56 | 37.27 | 27.15 | 22.98 | 32.61 | 25.38 | 24.89 | 29.47 | -15.41 | -15.03 | -15.23 | -14.83 | -15.42 | -15.31 | -15.29 | -15.26 | -15.43 |
| 18 | 20.08 | 28.67 | 42.01 | 25.56 | 24.96 | 30.70 | 23.43 | 27.88 | 27.04 | -15.82 | -14.75 | -14.37 | -15.25 | -14.87 | -15.77 | -15.78 | -14.41 | -16.02 |
| 19 | 20.44 | 26.94 | 35.55 | 25.86 | 21.73 | 31.09 | 24.00 | 23.73 | 27.91 | -15.71 | -15.19 | -15.54 | -15.17 | -15.77 | -15.68 | -15.64 | -15.59 | -15.81 |
| 20 | 20.72 | 27.67 | 35.11 | 22.43 | 22.97 | 32.37 | 24.64 | 25.95 | 28.88 | -15.62 | -15.00 | -15.62 | -16.06 | -15.42 | -15.37 | -15.47 | -14.96 | -15.57 |
| 21 | 21.25 | 24.79 | 36.08 | 25.78 | 24.10 | 32.68 | 25.13 | 25.07 | 29.60 | -15.46 | -15.74 | -15.44 | -15.19 | -15.11 | -15.30 | -15.35 | -15.21 | -15.40 |
| 22 | 21.10 | 27.54 | 36.20 | 26.54 | 22.83 | 31.89 | 25.07 | 24.53 | 29.24 | -15.50 | -15.03 | -15.42 | -14.99 | -15.46 | -15.49 | -15.37 | -15.36 | -15.49 |
| 23 | 22.13 | 27.21 | 39.25 | 25.44 | 24.00 | 33.86 | 26.61 | 25.61 | 31.01 | -15.18 | -15.12 | -14.87 | -15.28 | -15.14 | -15.01 | -14.97 | -15.05 | -15.06 |
| 24 | 21.18 | 26.59 | 37.54 | 24.16 | 22.76 | 32.34 | 25.22 | 24.45 | 29.46 | -15.48 | -15.28 | -15.18 | -15.61 | -15.48 | -15.38 | -15.33 | -15.38 | -15.43 |
| 25 | 20.85 | 26.51 | 34.65 | 25.51 | 22.67 | 31.68 | 23.33 | 24.08 | 29.11 | -15.58 | -15.30 | -15.70 | -15.26 | -15.51 | -15.54 | -15.81 | -15.49 | -15.52 |
| 26 | 21.18 | 26.59 | 37.54 | 24.16 | 22.76 | 32.34 | 25.22 | 24.45 | 29.46 | -15.48 | -15.28 | -15.18 | -15.61 | -15.48 | -15.38 | -15.33 | -15.38 | -15.43 |
| 27 | 23.49 | 27.25 | 39.34 | 23.21 | 22.13 | 33.90 | 25.10 | 25.50 | 29.87 | -14.75 | -15.11 | -14.85 | -15.86 | -15.65 | -15.00 | -15.36 | -15.08 | -15.33 |
| 28 | 19.09 | 25.69 | 34.00 | 24.25 | 21.48 | 29.88 | 23.53 | 24.27 | 25.97 | -16.14 | -15.51 | -15.82 | -15.59 | -15.84 | -15.97 | -15.76 | -15.43 | -16.28 |
| 29 | 19.93 | 25.68 | 33.39 | 22.91 | 20.01 | 30.56 | 23.14 | 22.96 | 27.58 | -15.87 | -15.51 | -15.93 | -15.94 | -16.24 | -15.81 | -15.86 | -15.81 | -15.89 |
| 30 | 18.50 | 24.57 | 32.04 | 23.61 | 22.11 | 29.18 | 22.01 | 23.45 | 27.31 | -16.33 | -15.79 | -16.17 | -15.76 | -15.66 | -16.14 | -16.14 | -15.67 | -15.96 |
| 31 | 20.22 | 23.92 | 34.31 | 23.99 | 22.33 | 31.20 | 23.38 | 23.32 | 28.19 | -15.78 | -15.96 | -15.76 | -15.66 | -15.60 | -15.65 | -15.80 | -15.70 | -15.74 |
| 32 | 19.50 | 19.05 | 34.01 | 24.32 | 22.79 | 31.58 | 22.82 | 23.81 | 28.89 | -16.01 | -17.20 | -15.82 | -15.57 | -15.47 | -15.56 | -15.94 | -15.57 | -15.57 |
| 33 | 21.83 | 26.27 | 35.17 | 23.82 | 23.18 | 32.60 | 26.18 | 24.98 | 29.91 | -15.27 | -15.36 | -15.61 | -15.70 | -15.37 | -15.32 | -15.08 | -15.23 | -15.32 |
| 34 | 19.80 | 26.39 | 34.23 | 23.79 | 21.46 | 30.39 | 23.27 | 23.21 | 27.04 | -15.92 | -15.33 | -15.78 | -15.71 | -15.84 | -15.85 | -15.82 | -15.73 | -16.02 |
| 35 | 20.41 | 23.76 | 35.64 | 23.66 | 22.11 | 31.12 | 24.58 | 23.99 | 29.04 | -15.72 | -16.00 | -15.52 | -15.74 | -15.66 | -15.67 | -15.49 | -15.51 | -15.54 |
| 36 | 20.92 | 25.71 | 35.99 | 24.62 | 22.48 | 32.33 | 24.59 | 24.54 | 27.31 | -15.56 | -15.50 | -15.46 | -15.49 | -15.56 | -15.38 | -15.49 | -15.36 | -15.96 |
| 37 | 19.30 | 23.72 | 32.83 | 23.29 | 22.03 | 29.98 | 23.44 | 23.21 | 26.75 | -16.07 | -16.01 | -16.03 | -15.84 | -15.68 | -15.95 | -15.78 | -15.73 | -16.09 |

|    |       |       |       |       |       |       |       |       |       |        |        |        |        |        |        |        |        |        |
|----|-------|-------|-------|-------|-------|-------|-------|-------|-------|--------|--------|--------|--------|--------|--------|--------|--------|--------|
| 38 | 18.50 | 23.54 | 32.04 | 22.67 | 21.02 | 29.18 | 22.01 | 23.40 | 27.27 | -16.33 | -16.05 | -16.17 | -16.00 | -15.96 | -16.14 | -16.14 | -15.68 | -15.97 |
| 39 | 19.91 | 24.66 | 34.39 | 22.74 | 21.85 | 30.45 | 23.61 | 23.13 | 27.73 | -15.88 | -15.77 | -15.75 | -15.98 | -15.73 | -15.83 | -15.74 | -15.76 | -15.85 |
| 40 | 21.64 | 24.34 | 35.24 | 22.24 | 20.70 | 30.62 | 22.74 | 24.08 | 27.95 | -15.33 | -15.85 | -15.59 | -16.11 | -16.05 | -15.79 | -15.96 | -15.49 | -15.80 |
| 41 | 20.33 | 26.14 | 34.01 | 23.52 | 21.77 | 30.56 | 23.01 | 23.16 | 27.25 | -15.75 | -15.39 | -15.82 | -15.78 | -15.75 | -15.81 | -15.89 | -15.75 | -15.97 |
| 42 | 20.36 | 27.54 | 39.84 | 24.87 | 25.04 | 32.14 | 25.66 | 25.25 | 29.62 | -15.74 | -15.03 | -14.76 | -15.43 | -14.85 | -15.43 | -15.22 | -15.16 | -15.39 |
| 43 | 19.58 | 24.47 | 34.01 | 23.25 | 19.32 | 30.17 | 23.24 | 22.16 | 27.60 | -15.99 | -15.82 | -15.82 | -15.85 | -16.43 | -15.90 | -15.83 | -16.03 | -15.89 |
| 44 | 19.90 | 25.94 | 33.92 | 23.41 | 22.10 | 30.54 | 23.41 | 23.78 | 27.05 | -15.88 | -15.44 | -15.83 | -15.81 | -15.66 | -15.81 | -15.79 | -15.57 | -16.02 |
| 45 | 19.24 | 22.10 | 31.21 | 22.30 | 19.29 | 28.80 | 20.77 | 22.75 | 25.95 | -16.09 | -16.42 | -16.33 | -16.10 | -16.44 | -16.23 | -16.46 | -15.86 | -16.29 |
| 46 | 19.62 | 25.44 | 33.77 | 23.98 | 21.79 | 30.06 | 23.27 | 24.22 | 26.18 | -15.97 | -15.57 | -15.86 | -15.66 | -15.75 | -15.93 | -15.82 | -15.45 | -16.23 |
| 47 | 19.26 | 23.31 | 32.60 | 22.71 | 21.08 | 29.69 | 22.00 | 22.16 | 26.63 | -16.08 | -16.11 | -16.07 | -15.99 | -15.94 | -16.02 | -16.15 | -16.03 | -16.12 |
| 48 | 19.96 | 25.09 | 34.27 | 23.34 | 21.23 | 30.81 | 23.21 | 23.38 | 25.75 | -15.86 | -15.66 | -15.77 | -15.83 | -15.90 | -15.75 | -15.84 | -15.69 | -16.33 |
| 49 | 19.26 | 23.31 | 32.60 | 22.71 | 21.08 | 29.69 | 22.00 | 22.16 | 26.63 | -16.08 | -16.11 | -16.07 | -15.99 | -15.94 | -16.02 | -16.15 | -16.03 | -16.12 |
| 50 | 19.96 | 25.09 | 34.27 | 23.34 | 21.23 | 30.81 | 23.21 | 23.38 | 25.75 | -15.86 | -15.66 | -15.77 | -15.83 | -15.90 | -15.75 | -15.84 | -15.69 | -16.33 |
| 51 | 17.54 | 22.92 | 30.33 | 21.38 | 19.77 | 27.66 | 20.62 | 22.24 | 25.72 | -16.63 | -16.21 | -16.48 | -16.34 | -16.31 | -16.51 | -16.50 | -16.01 | -16.34 |
| 52 | 20.19 | 24.56 | 32.70 | 21.48 | 20.79 | 29.69 | 21.91 | 21.82 | 26.62 | -15.79 | -15.79 | -16.06 | -16.31 | -16.03 | -16.02 | -16.17 | -16.13 | -16.12 |
| 53 | 19.26 | 23.31 | 32.60 | 22.71 | 21.08 | 29.69 | 22.00 | 22.16 | 26.63 | -16.08 | -16.11 | -16.07 | -15.99 | -15.94 | -16.02 | -16.15 | -16.03 | -16.12 |
| 54 | 19.71 | 27.09 | 35.54 | 26.02 | 22.16 | 30.88 | 23.81 | 25.03 | 28.39 | -15.94 | -15.15 | -15.54 | -15.13 | -15.65 | -15.73 | -15.69 | -15.22 | -15.69 |
| 55 | 18.64 | 22.54 | 31.35 | 20.69 | 19.82 | 28.24 | 21.91 | 22.76 | 24.82 | -16.28 | -16.31 | -16.30 | -16.52 | -16.29 | -16.37 | -16.17 | -15.86 | -16.56 |
| 56 | 19.57 | 23.54 | 32.04 | 23.71 | 21.29 | 30.42 | 23.37 | 22.75 | 26.81 | -15.99 | -16.05 | -16.17 | -15.73 | -15.89 | -15.84 | -15.80 | -15.87 | -16.08 |
| 57 | 19.70 | 24.37 | 33.68 | 23.35 | 21.26 | 30.38 | 23.40 | 22.57 | 27.59 | -15.95 | -15.84 | -15.88 | -15.82 | -15.90 | -15.85 | -15.79 | -15.92 | -15.89 |
| 58 | 19.57 | 23.54 | 32.04 | 23.71 | 21.29 | 30.42 | 23.37 | 22.75 | 26.81 | -15.99 | -16.05 | -16.17 | -15.73 | -15.89 | -15.84 | -15.80 | -15.87 | -16.08 |
| 59 | 19.70 | 24.37 | 33.68 | 23.35 | 21.26 | 30.38 | 23.40 | 22.57 | 27.59 | -15.95 | -15.84 | -15.88 | -15.82 | -15.90 | -15.85 | -15.79 | -15.92 | -15.89 |
| 60 | 20.41 | 23.76 | 35.64 | 23.66 | 22.11 | 31.12 | 24.58 | 23.99 | 29.04 | -15.72 | -16.00 | -15.52 | -15.74 | -15.66 | -15.67 | -15.49 | -15.51 | -15.54 |
| 61 | 20.00 | 24.73 | 34.21 | 25.57 | 21.43 | 29.44 | 22.93 | 24.51 | 27.79 | -15.85 | -15.75 | -15.78 | -15.25 | -15.85 | -16.08 | -15.91 | -15.37 | -15.84 |
| 62 | 18.50 | 23.51 | 32.04 | 22.67 | 21.26 | 29.18 | 22.01 | 22.39 | 26.97 | -16.33 | -16.06 | -16.17 | -16.00 | -15.90 | -16.14 | -16.14 | -15.97 | -16.04 |
| 63 | 18.50 | 22.98 | 33.07 | 21.47 | 20.27 | 28.19 | 22.12 | 21.34 | 25.88 | -16.33 | -16.20 | -15.99 | -16.31 | -16.17 | -16.38 | -16.12 | -16.27 | -16.30 |
| 64 | 18.61 | 22.92 | 30.33 | 22.42 | 20.04 | 28.90 | 21.99 | 21.59 | 25.26 | -16.29 | -16.21 | -16.48 | -16.07 | -16.23 | -16.21 | -16.15 | -16.20 | -16.45 |
| 65 | 18.74 | 23.76 | 31.97 | 22.07 | 20.01 | 28.86 | 22.01 | 21.42 | 26.03 | -16.25 | -16.00 | -16.19 | -16.16 | -16.24 | -16.22 | -16.14 | -16.25 | -16.27 |
| 66 | 19.93 | 24.29 | 33.17 | 22.02 | 21.69 | 29.59 | 23.75 | 23.85 | 26.85 | -15.87 | -15.86 | -15.97 | -16.17 | -15.78 | -16.04 | -15.70 | -15.55 | -16.07 |
| 67 | 20.87 | 24.75 | 34.28 | 24.84 | 21.38 | 30.40 | 24.50 | 22.77 | 28.90 | -15.58 | -15.75 | -15.77 | -15.44 | -15.86 | -15.85 | -15.51 | -15.86 | -15.57 |

|    |       |       |       |       |       |       |       |       |       |        |        |        |        |        |        |        |        |        |
|----|-------|-------|-------|-------|-------|-------|-------|-------|-------|--------|--------|--------|--------|--------|--------|--------|--------|--------|
| 68 | 18.82 | 22.98 | 33.93 | 25.53 | 23.96 | 29.03 | 20.39 | 23.12 | 26.90 | -16.23 | -16.20 | -15.83 | -15.26 | -15.15 | -16.18 | -16.56 | -15.76 | -16.06 |
| 69 | 18.47 | 18.97 | 30.99 | 22.20 | 19.93 | 28.04 | 20.99 | 21.51 | 24.43 | -16.34 | -17.22 | -16.37 | -16.12 | -16.26 | -16.41 | -16.40 | -16.22 | -16.66 |
| 70 | 18.27 | 22.86 | 31.05 | 21.50 | 20.26 | 28.50 | 21.69 | 21.46 | 25.34 | -16.40 | -16.23 | -16.35 | -16.31 | -16.17 | -16.30 | -16.23 | -16.23 | -16.43 |
| 71 | 18.27 | 22.86 | 31.05 | 21.50 | 20.26 | 28.50 | 21.69 | 21.46 | 25.34 | -16.40 | -16.23 | -16.35 | -16.31 | -16.17 | -16.30 | -16.23 | -16.23 | -16.43 |
| 72 | 19.57 | 22.35 | 31.79 | 21.98 | 19.89 | 31.57 | 21.56 | 21.62 | 28.41 | -15.99 | -16.36 | -16.22 | -16.18 | -16.27 | -15.56 | -16.26 | -16.19 | -15.69 |
| 73 | 17.54 | 22.92 | 30.33 | 21.66 | 19.82 | 27.66 | 20.62 | 21.31 | 25.75 | -16.63 | -16.21 | -16.48 | -16.26 | -16.29 | -16.51 | -16.50 | -16.28 | -16.33 |
| 74 | 17.54 | 22.92 | 30.33 | 21.38 | 19.74 | 27.66 | 20.62 | 21.23 | 25.75 | -16.63 | -16.21 | -16.48 | -16.34 | -16.32 | -16.51 | -16.50 | -16.30 | -16.33 |
| 75 | 17.31 | 22.24 | 29.34 | 20.22 | 19.01 | 26.98 | 20.31 | 20.31 | 23.78 | -16.70 | -16.39 | -16.66 | -16.64 | -16.52 | -16.67 | -16.58 | -16.56 | -16.81 |
| 76 | 18.66 | 23.08 | 31.45 | 20.44 | 18.58 | 29.18 | 21.68 | 21.96 | 26.27 | -16.28 | -16.17 | -16.28 | -16.58 | -16.64 | -16.14 | -16.23 | -16.09 | -16.21 |
| 77 | 18.32 | 22.92 | 30.67 | 21.21 | 19.42 | 28.14 | 20.97 | 20.87 | 25.51 | -16.38 | -16.21 | -16.42 | -16.38 | -16.40 | -16.39 | -16.41 | -16.40 | -16.39 |
| 78 | 17.10 | 21.00 | 30.38 | 21.49 | 17.72 | 30.41 | 19.68 | 21.03 | 27.06 | -16.77 | -16.70 | -16.48 | -16.31 | -16.87 | -15.84 | -16.74 | -16.36 | -16.02 |
| 79 | 15.78 | 21.71 | 25.93 | 21.38 | 17.88 | 25.55 | 18.26 | 17.42 | 23.37 | -17.19 | -16.52 | -17.28 | -16.34 | -16.83 | -17.02 | -17.10 | -17.38 | -16.91 |
| 80 | 18.03 | 22.14 | 29.47 | 20.42 | 19.07 | 30.32 | 20.47 | 20.72 | 27.35 | -16.47 | -16.41 | -16.64 | -16.59 | -16.50 | -15.87 | -16.54 | -16.44 | -15.95 |
| 81 | 17.35 | 22.24 | 29.51 | 22.11 | 19.34 | 26.96 | 19.88 | 19.71 | 24.23 | -16.69 | -16.39 | -16.63 | -16.15 | -16.43 | -16.68 | -16.69 | -16.73 | -16.70 |
| 82 | 18.32 | 22.92 | 30.67 | 21.21 | 19.42 | 28.14 | 20.97 | 20.87 | 25.51 | -16.38 | -16.21 | -16.42 | -16.38 | -16.40 | -16.39 | -16.41 | -16.40 | -16.39 |
| 83 | 17.28 | 21.60 | 29.09 | 20.19 | 19.54 | 27.11 | 20.18 | 18.72 | 23.95 | -16.71 | -16.55 | -16.71 | -16.65 | -16.37 | -16.64 | -16.61 | -17.01 | -16.77 |
| 84 | 17.55 | 23.15 | 29.40 | 20.15 | 17.26 | 27.37 | 20.69 | 20.35 | 24.71 | -16.63 | -16.15 | -16.65 | -16.66 | -17.00 | -16.58 | -16.48 | -16.55 | -16.59 |
| 85 | 17.38 | 23.92 | 29.95 | 19.76 | 17.87 | 28.33 | 19.74 | 21.28 | 25.27 | -16.68 | -15.96 | -16.55 | -16.76 | -16.83 | -16.35 | -16.72 | -16.29 | -16.45 |
| 86 | 20.01 | 22.81 | 35.58 | 23.91 | 21.74 | 30.00 | 20.81 | 21.28 | 24.90 | -15.85 | -16.24 | -15.53 | -15.68 | -15.76 | -15.94 | -16.45 | -16.28 | -16.54 |
| 87 | 17.76 | 21.01 | 29.71 | 19.93 | 18.43 | 27.50 | 20.20 | 20.21 | 24.62 | -16.56 | -16.70 | -16.60 | -16.72 | -16.68 | -16.55 | -16.60 | -16.59 | -16.61 |
| 88 | 16.10 | 20.69 | 27.83 | 19.28 | 18.64 | 26.06 | 19.17 | 20.36 | 23.20 | -17.08 | -16.78 | -16.94 | -16.88 | -16.62 | -16.89 | -16.87 | -16.55 | -16.95 |
| 89 | 16.92 | 19.56 | 29.13 | 19.83 | 17.99 | 26.50 | 19.61 | 18.22 | 23.53 | -16.83 | -17.07 | -16.70 | -16.74 | -16.80 | -16.79 | -16.76 | -17.15 | -16.87 |
| 90 | 17.35 | 22.24 | 29.51 | 22.11 | 19.34 | 26.96 | 19.88 | 19.71 | 24.23 | -16.69 | -16.39 | -16.63 | -16.15 | -16.43 | -16.68 | -16.69 | -16.73 | -16.70 |
| 91 | 17.06 | 21.97 | 28.65 | 19.42 | 17.71 | 25.95 | 19.99 | 19.41 | 24.26 | -16.78 | -16.45 | -16.79 | -16.85 | -16.88 | -16.92 | -16.66 | -16.82 | -16.70 |
| 92 | 13.84 | 19.34 | 25.88 | 19.38 | 16.99 | 22.99 | 17.82 | 19.31 | 21.23 | -17.80 | -17.13 | -17.29 | -16.86 | -17.08 | -17.63 | -17.21 | -16.84 | -17.43 |
| 93 | 16.37 | 17.81 | 27.13 | 18.05 | 17.14 | 25.49 | 18.39 | 18.39 | 22.96 | -17.00 | -17.52 | -17.06 | -17.21 | -17.04 | -17.03 | -17.07 | -17.11 | -17.01 |
| 94 | 16.32 | 19.41 | 27.01 | 19.30 | 18.10 | 26.53 | 17.26 | 17.77 | 23.26 | -17.02 | -17.11 | -17.09 | -16.88 | -16.77 | -16.78 | -17.36 | -17.28 | -16.94 |
| 95 | 17.30 | 20.90 | 28.97 | 20.95 | 18.71 | 26.78 | 19.38 | 18.81 | 24.74 | -16.70 | -16.73 | -16.73 | -16.45 | -16.60 | -16.72 | -16.81 | -16.99 | -16.58 |
| 96 | 17.23 | 21.38 | 27.01 | 20.02 | 18.05 | 25.72 | 19.22 | 19.42 | 23.07 | -16.73 | -16.61 | -17.09 | -16.69 | -16.78 | -16.98 | -16.86 | -16.81 | -16.99 |
| 97 | 17.84 | 20.97 | 30.21 | 21.92 | 20.19 | 28.22 | 19.57 | 20.83 | 24.89 | -16.53 | -16.71 | -16.51 | -16.20 | -16.19 | -16.37 | -16.77 | -16.41 | -16.54 |

|     |       |       |       |       |       |       |       |       |       |        |        |        |        |        |        |        |        |        |
|-----|-------|-------|-------|-------|-------|-------|-------|-------|-------|--------|--------|--------|--------|--------|--------|--------|--------|--------|
| 98  | 16.01 | 20.79 | 27.22 | 18.40 | 18.09 | 25.16 | 18.68 | 19.54 | 22.28 | -17.11 | -16.76 | -17.05 | -17.12 | -16.77 | -17.11 | -16.99 | -16.78 | -17.18 |
| 99  | 16.29 | 19.68 | 27.11 | 19.31 | 18.09 | 26.76 | 18.29 | 19.47 | 23.74 | -17.02 | -17.04 | -17.07 | -16.88 | -16.77 | -16.72 | -17.09 | -16.80 | -16.82 |
| 100 | 16.60 | 20.50 | 29.47 | 20.39 | 17.92 | 26.34 | 19.73 | 19.16 | 23.34 | -16.92 | -16.83 | -16.64 | -16.60 | -16.82 | -16.83 | -16.72 | -16.89 | -16.92 |
| 101 | 19.02 | 22.74 | 28.68 | 20.37 | 20.81 | 29.82 | 20.19 | 20.80 | 25.50 | -16.16 | -16.26 | -16.79 | -16.60 | -16.02 | -15.99 | -16.61 | -16.42 | -16.39 |
| 102 | 15.57 | 19.24 | 26.84 | 19.00 | 16.96 | 25.01 | 17.94 | 18.04 | 22.11 | -17.25 | -17.15 | -17.12 | -16.96 | -17.09 | -17.15 | -17.18 | -17.21 | -17.22 |
| 103 | 16.29 | 20.27 | 27.07 | 18.57 | 17.37 | 25.63 | 18.73 | 19.57 | 21.20 | -17.02 | -16.89 | -17.08 | -17.07 | -16.97 | -17.00 | -16.98 | -16.77 | -17.44 |
| 104 | 15.16 | 20.40 | 26.34 | 18.62 | 17.01 | 24.46 | 18.17 | 19.64 | 22.85 | -17.38 | -16.86 | -17.21 | -17.06 | -17.07 | -17.28 | -17.12 | -16.75 | -17.04 |
| 105 | 13.11 | 19.14 | 24.52 | 18.93 | 16.48 | 22.10 | 16.53 | 17.58 | 20.09 | -18.03 | -17.18 | -17.54 | -16.98 | -17.22 | -17.85 | -17.54 | -17.34 | -17.71 |
| 106 | 16.92 | 21.25 | 26.86 | 19.62 | 18.30 | 27.78 | 18.34 | 20.51 | 24.36 | -16.82 | -16.64 | -17.11 | -16.80 | -16.71 | -16.48 | -17.08 | -16.50 | -16.67 |
| 107 | 15.61 | 20.39 | 27.76 | 17.73 | 18.81 | 25.00 | 18.30 | 18.98 | 22.51 | -17.24 | -16.86 | -16.95 | -17.29 | -16.57 | -17.15 | -17.09 | -16.94 | -17.12 |
| 108 | 16.22 | 20.05 | 25.14 | 18.26 | 17.43 | 25.54 | 17.58 | 19.38 | 22.70 | -17.05 | -16.95 | -17.43 | -17.15 | -16.96 | -17.02 | -17.27 | -16.82 | -17.07 |
| 109 | 15.99 | 16.42 | 26.97 | 18.19 | 16.93 | 25.35 | 18.34 | 18.57 | 22.78 | -17.12 | -17.87 | -17.09 | -17.17 | -17.09 | -17.06 | -17.08 | -17.06 | -17.06 |
| 110 | 15.57 | 19.24 | 26.84 | 19.00 | 16.96 | 25.01 | 17.94 | 18.04 | 22.11 | -17.25 | -17.15 | -17.12 | -16.96 | -17.09 | -17.15 | -17.18 | -17.21 | -17.22 |
| 111 | 15.31 | 19.24 | 25.48 | 17.76 | 16.78 | 23.73 | 17.87 | 18.08 | 21.78 | -17.33 | -17.15 | -17.37 | -17.28 | -17.13 | -17.45 | -17.20 | -17.20 | -17.30 |
| 112 | 15.59 | 18.48 | 25.39 | 17.95 | 17.22 | 24.51 | 17.52 | 18.35 | 22.09 | -17.24 | -17.35 | -17.38 | -17.23 | -17.01 | -17.27 | -17.29 | -17.12 | -17.23 |
| 113 | 15.59 | 18.48 | 25.39 | 17.95 | 17.22 | 24.51 | 17.52 | 18.35 | 22.09 | -17.24 | -17.35 | -17.38 | -17.23 | -17.01 | -17.27 | -17.29 | -17.12 | -17.23 |
| 114 | 16.06 | 20.78 | 27.72 | 19.04 | 17.87 | 25.69 | 18.84 | 19.63 | 22.62 | -17.10 | -16.76 | -16.96 | -16.95 | -16.83 | -16.98 | -16.95 | -16.75 | -17.10 |
| 115 | 17.51 | 22.35 | 28.36 | 20.25 | 18.54 | 27.52 | 19.60 | 20.59 | 24.38 | -16.64 | -16.36 | -16.84 | -16.63 | -16.65 | -16.54 | -16.76 | -16.48 | -16.67 |
| 116 | 16.29 | 19.68 | 27.11 | 19.31 | 18.09 | 26.76 | 18.29 | 19.47 | 23.74 | -17.02 | -17.04 | -17.07 | -16.88 | -16.77 | -16.72 | -17.09 | -16.80 | -16.82 |
| 117 | 17.12 | 21.23 | 27.25 | 18.27 | 18.90 | 26.23 | 19.01 | 18.71 | 23.56 | -16.76 | -16.64 | -17.04 | -17.15 | -16.55 | -16.85 | -16.91 | -17.01 | -16.87 |
| 118 | 17.38 | 20.77 | 27.05 | 18.21 | 17.56 | 26.65 | 18.49 | 19.25 | 23.76 | -16.68 | -16.76 | -17.08 | -17.16 | -16.92 | -16.75 | -17.04 | -16.86 | -16.82 |
| 119 | 16.57 | 18.07 | 26.56 | 17.84 | 15.58 | 25.00 | 17.87 | 17.72 | 22.92 | -16.94 | -17.45 | -17.17 | -17.26 | -17.47 | -17.15 | -17.20 | -17.30 | -17.02 |
| 120 | 16.75 | 19.20 | 27.30 | 17.90 | 17.35 | 25.62 | 18.44 | 18.21 | 23.14 | -16.88 | -17.16 | -17.03 | -17.24 | -16.98 | -17.00 | -17.05 | -17.16 | -16.97 |
| 121 | 17.85 | 20.70 | 28.00 | 19.62 | 18.34 | 27.45 | 18.70 | 19.54 | 24.31 | -16.53 | -16.78 | -16.91 | -16.80 | -16.70 | -16.56 | -16.99 | -16.78 | -16.68 |
| 122 | 15.38 | 21.17 | 26.10 | 18.66 | 16.15 | 24.80 | 17.19 | 18.90 | 21.90 | -17.31 | -16.66 | -17.25 | -17.05 | -17.31 | -17.20 | -17.37 | -16.96 | -17.27 |
| 123 | 15.59 | 18.48 | 25.39 | 17.95 | 17.22 | 24.51 | 17.52 | 18.35 | 22.09 | -17.24 | -17.35 | -17.38 | -17.23 | -17.01 | -17.27 | -17.29 | -17.12 | -17.23 |
| 124 | 17.25 | 22.81 | 28.56 | 20.31 | 19.88 | 27.10 | 20.11 | 20.06 | 24.18 | -16.72 | -16.24 | -16.81 | -16.62 | -16.28 | -16.64 | -16.63 | -16.63 | -16.72 |
| 125 | 17.64 | 21.17 | 31.76 | 21.19 | 18.33 | 27.89 | 19.97 | 21.36 | 25.21 | -16.60 | -16.66 | -16.23 | -16.39 | -16.71 | -16.45 | -16.66 | -16.26 | -16.47 |
| 126 | 16.85 | 24.17 | 28.40 | 18.86 | 17.78 | 25.54 | 19.05 | 20.70 | 23.25 | -16.85 | -15.89 | -16.84 | -16.99 | -16.86 | -17.02 | -16.90 | -16.45 | -16.94 |
| 127 | 16.97 | 20.20 | 27.93 | 17.78 | 17.13 | 25.59 | 19.26 | 19.11 | 23.21 | -16.81 | -16.91 | -16.92 | -17.28 | -17.04 | -17.01 | -16.85 | -16.90 | -16.95 |

|     |       |       |       |       |       |       |       |       |       |        |        |        |        |        |        |        |        |        |
|-----|-------|-------|-------|-------|-------|-------|-------|-------|-------|--------|--------|--------|--------|--------|--------|--------|--------|--------|
| 128 | 15.95 | 20.22 | 27.14 | 20.03 | 17.34 | 25.06 | 18.28 | 18.78 | 22.01 | -17.13 | -16.90 | -17.06 | -16.69 | -16.98 | -17.14 | -17.09 | -17.00 | -17.24 |
| 129 | 16.60 | 18.81 | 27.76 | 17.92 | 16.92 | 25.46 | 19.21 | 19.29 | 23.03 | -16.93 | -17.26 | -16.95 | -17.24 | -17.10 | -17.04 | -16.86 | -16.85 | -17.00 |
| 130 | 12.38 | 16.35 | 20.77 | 16.11 | 11.81 | 21.06 | 14.18 | 12.65 | 19.79 | -18.26 | -17.89 | -18.22 | -17.71 | -18.51 | -18.10 | -18.14 | -18.74 | -17.78 |
| 131 | 12.00 | 16.80 | 26.51 | 16.15 | 14.99 | 21.77 | 12.92 | 16.69 | 16.71 | -18.38 | -17.77 | -17.18 | -17.70 | -17.63 | -17.93 | -18.46 | -17.59 | -18.53 |
| 132 | 15.82 | 18.79 | 26.33 | 20.10 | 17.14 | 25.03 | 18.16 | 17.95 | 22.49 | -17.17 | -17.27 | -17.21 | -16.67 | -17.03 | -17.14 | -17.13 | -17.23 | -17.13 |
| 133 | 15.16 | 20.40 | 27.22 | 18.37 | 16.79 | 24.46 | 18.17 | 19.48 | 22.88 | -17.38 | -16.86 | -17.05 | -17.12 | -17.13 | -17.28 | -17.12 | -16.80 | -17.03 |
| 134 | 15.82 | 19.48 | 26.02 | 17.82 | 17.00 | 24.49 | 18.34 | 19.25 | 22.16 | -17.17 | -17.09 | -17.27 | -17.27 | -17.07 | -17.27 | -17.08 | -16.86 | -17.21 |
| 135 | 15.60 | 22.17 | 26.73 | 18.54 | 15.93 | 24.77 | 18.00 | 19.81 | 21.97 | -17.24 | -16.40 | -17.14 | -17.08 | -17.37 | -17.20 | -17.16 | -16.70 | -17.25 |
| 136 | 16.14 | 18.85 | 26.67 | 19.00 | 15.89 | 25.88 | 18.32 | 17.32 | 22.56 | -17.07 | -17.25 | -17.15 | -16.96 | -17.38 | -16.94 | -17.08 | -17.41 | -17.11 |
| 137 | 16.32 | 19.29 | 27.28 | 17.99 | 16.02 | 24.49 | 18.59 | 17.95 | 22.94 | -17.02 | -17.14 | -17.04 | -17.22 | -17.35 | -17.27 | -17.02 | -17.23 | -17.02 |
| 138 | 14.91 | 17.04 | 26.53 | 16.52 | 15.58 | 24.37 | 17.47 | 14.83 | 21.45 | -17.46 | -17.71 | -17.17 | -17.61 | -17.47 | -17.30 | -17.30 | -18.12 | -17.38 |
| 139 | 15.03 | 19.65 | 26.18 | 14.79 | 16.66 | 24.07 | 17.38 | 17.78 | 21.24 | -17.42 | -17.05 | -17.24 | -18.06 | -17.17 | -17.37 | -17.32 | -17.28 | -17.43 |
| 140 | 13.25 | 16.67 | 21.18 | 16.96 | 14.84 | 21.20 | 14.21 | 17.11 | 19.67 | -17.99 | -17.81 | -18.14 | -17.49 | -17.67 | -18.07 | -18.13 | -17.47 | -17.81 |
| 141 | 16.17 | 18.09 | 25.23 | 17.95 | 16.15 | 25.38 | 17.90 | 17.63 | 22.53 | -17.06 | -17.44 | -17.41 | -17.23 | -17.31 | -17.06 | -17.19 | -17.32 | -17.12 |
| 142 | 16.87 | 19.30 | 26.95 | 19.31 | 17.02 | 27.62 | 18.67 | 18.75 | 24.19 | -16.84 | -17.14 | -17.10 | -16.88 | -17.07 | -16.52 | -16.99 | -17.00 | -16.71 |
| 143 | 15.55 | 18.90 | 26.56 | 17.46 | 16.41 | 25.14 | 18.26 | 18.46 | 22.57 | -17.26 | -17.24 | -17.17 | -17.36 | -17.24 | -17.11 | -17.10 | -17.09 | -17.11 |
| 144 | 14.93 | 18.46 | 22.40 | 16.33 | 15.24 | 24.60 | 15.87 | 16.28 | 21.19 | -17.45 | -17.35 | -17.92 | -17.65 | -17.56 | -17.25 | -17.71 | -17.71 | -17.44 |
| 145 | 17.46 | 20.40 | 28.44 | 19.95 | 17.26 | 27.35 | 19.92 | 18.84 | 24.21 | -16.65 | -16.86 | -16.83 | -16.71 | -17.00 | -16.58 | -16.68 | -16.98 | -16.71 |
| 146 | 15.07 | 16.61 | 24.41 | 16.88 | 14.03 | 24.13 | 17.14 | 16.20 | 21.82 | -17.41 | -17.82 | -17.56 | -17.51 | -17.89 | -17.36 | -17.39 | -17.73 | -17.29 |
| 147 | 16.21 | 19.23 | 26.77 | 20.64 | 17.13 | 25.26 | 17.89 | 19.70 | 22.40 | -17.05 | -17.15 | -17.13 | -16.53 | -17.04 | -17.09 | -17.19 | -16.73 | -17.15 |
| 148 | 14.67 | 18.50 | 24.83 | 17.65 | 18.25 | 23.51 | 16.57 | 17.26 | 21.17 | -17.54 | -17.34 | -17.48 | -17.31 | -16.73 | -17.51 | -17.53 | -17.43 | -17.45 |
| 149 | 13.45 | 16.32 | 23.56 | 16.11 | 13.21 | 22.06 | 15.75 | 15.91 | 20.36 | -17.92 | -17.90 | -17.71 | -17.71 | -18.12 | -17.86 | -17.74 | -17.81 | -17.65 |
| 150 | 14.92 | 17.11 | 24.02 | 17.32 | 16.15 | 24.62 | 16.58 | 17.40 | 21.86 | -17.46 | -17.70 | -17.63 | -17.40 | -17.31 | -17.24 | -17.53 | -17.39 | -17.28 |
| 151 | 13.25 | 18.22 | 21.18 | 16.02 | 13.75 | 21.20 | 14.21 | 17.06 | 19.63 | -17.99 | -17.41 | -18.14 | -17.74 | -17.97 | -18.07 | -18.13 | -17.48 | -17.82 |
| 152 | 14.17 | 18.73 | 23.78 | 18.41 | 15.34 | 23.37 | 16.50 | 18.14 | 20.68 | -17.69 | -17.28 | -17.67 | -17.11 | -17.53 | -17.54 | -17.55 | -17.18 | -17.57 |
| 153 | 15.51 | 18.20 | 25.52 | 17.95 | 16.38 | 24.35 | 17.83 | 17.49 | 21.88 | -17.27 | -17.42 | -17.36 | -17.23 | -17.24 | -17.30 | -17.21 | -17.36 | -17.27 |
| 154 | 14.97 | 17.88 | 24.91 | 18.46 | 15.80 | 23.66 | 16.81 | 16.98 | 21.43 | -17.44 | -17.50 | -17.47 | -17.10 | -17.41 | -17.47 | -17.47 | -17.51 | -17.39 |
| 155 | 14.51 | 17.54 | 24.25 | 12.81 | 15.19 | 23.27 | 16.40 | 16.80 | 20.68 | -17.59 | -17.59 | -17.59 | -18.57 | -17.58 | -17.57 | -17.57 | -17.56 | -17.57 |
| 156 | 15.33 | 18.07 | 23.40 | 17.58 | 16.62 | 23.84 | 16.15 | 17.48 | 20.97 | -17.33 | -17.45 | -17.74 | -17.33 | -17.18 | -17.43 | -17.64 | -17.36 | -17.50 |
| 157 | 13.52 | 15.87 | 23.77 | 16.05 | 14.99 | 21.97 | 15.56 | 15.72 | 19.56 | -17.90 | -18.01 | -17.67 | -17.73 | -17.63 | -17.88 | -17.79 | -17.86 | -17.84 |

|     |       |       |       |       |       |       |       |       |       |        |        |        |        |        |        |        |        |        |
|-----|-------|-------|-------|-------|-------|-------|-------|-------|-------|--------|--------|--------|--------|--------|--------|--------|--------|--------|
| 158 | 12.90 | 14.91 | 21.91 | 13.31 | 11.30 | 21.15 | 14.65 | 14.80 | 17.62 | -18.10 | -18.26 | -18.01 | -18.44 | -18.65 | -18.08 | -18.02 | -18.13 | -18.31 |
| 159 | 12.57 | 15.16 | 20.19 | 13.04 | 12.71 | 20.64 | 14.01 | 14.09 | 18.93 | -18.20 | -18.19 | -18.32 | -18.51 | -18.26 | -18.20 | -18.18 | -18.33 | -17.99 |
| 160 | 14.38 | 21.69 | 23.84 | 16.84 | 15.41 | 22.88 | 16.06 | 17.84 | 20.46 | -17.63 | -16.53 | -17.66 | -17.52 | -17.51 | -17.66 | -17.66 | -17.26 | -17.62 |
| 161 | 13.87 | 18.06 | 23.12 | 16.62 | 16.15 | 22.49 | 16.15 | 17.42 | 20.87 | -17.79 | -17.45 | -17.79 | -17.58 | -17.31 | -17.76 | -17.64 | -17.38 | -17.52 |
| 162 | 9.63  | 16.98 | 16.09 | 14.24 | 14.26 | 22.17 | 11.58 | 15.12 | 15.38 | -19.13 | -17.73 | -19.07 | -18.20 | -17.83 | -17.83 | -18.80 | -18.04 | -18.86 |
| 163 | 14.17 | 17.78 | 24.10 | 16.05 | 15.65 | 22.73 | 15.95 | 16.68 | 20.12 | -17.69 | -17.52 | -17.61 | -17.73 | -17.45 | -17.70 | -17.69 | -17.59 | -17.70 |
| 164 | 14.34 | 18.62 | 23.85 | 16.82 | 16.03 | 24.06 | 16.60 | 17.62 | 20.89 | -17.64 | -17.31 | -17.66 | -17.53 | -17.34 | -17.38 | -17.52 | -17.33 | -17.52 |
| 165 | 12.20 | 13.12 | 20.23 | 12.68 | 11.15 | 20.03 | 13.44 | 13.58 | 18.51 | -18.32 | -18.71 | -18.32 | -18.61 | -18.69 | -18.35 | -18.33 | -18.47 | -18.10 |
| 166 | 14.94 | 19.72 | 25.35 | 17.45 | 16.26 | 23.79 | 17.86 | 17.70 | 20.91 | -17.45 | -17.03 | -17.39 | -17.36 | -17.28 | -17.44 | -17.20 | -17.30 | -17.51 |
| 167 | 12.20 | 13.12 | 20.23 | 12.68 | 11.15 | 20.03 | 13.44 | 13.58 | 18.51 | -18.32 | -18.71 | -18.32 | -18.61 | -18.69 | -18.35 | -18.33 | -18.47 | -18.10 |
| 168 | 10.48 | 16.61 | 17.96 | 11.35 | 14.40 | 18.00 | 12.07 | 12.65 | 17.62 | -18.86 | -17.82 | -18.73 | -18.95 | -17.79 | -18.84 | -18.68 | -18.74 | -18.31 |
| 169 | 9.63  | 14.04 | 16.96 | 11.85 | 12.89 | 22.17 | 11.58 | 12.01 | 15.38 | -19.13 | -18.48 | -18.91 | -18.82 | -18.21 | -17.83 | -18.80 | -18.92 | -18.86 |
| 170 | 12.87 | 15.65 | 21.26 | 14.73 | 12.86 | 20.75 | 14.91 | 16.00 | 17.80 | -18.11 | -18.07 | -18.13 | -18.07 | -18.22 | -18.17 | -17.95 | -17.79 | -18.27 |
| 171 | 12.87 | 15.65 | 21.26 | 14.73 | 12.86 | 20.75 | 14.91 | 16.00 | 17.80 | -18.11 | -18.07 | -18.13 | -18.07 | -18.22 | -18.17 | -17.95 | -17.79 | -18.27 |
| 172 | 12.87 | 15.65 | 21.26 | 14.73 | 12.86 | 20.75 | 14.91 | 16.00 | 17.80 | -18.11 | -18.07 | -18.13 | -18.07 | -18.22 | -18.17 | -17.95 | -17.79 | -18.27 |
| 173 | 12.87 | 15.65 | 21.26 | 14.73 | 12.86 | 20.75 | 14.91 | 16.00 | 17.80 | -18.11 | -18.07 | -18.13 | -18.07 | -18.22 | -18.17 | -17.95 | -17.79 | -18.27 |
| 174 | 10.48 | 12.74 | 17.96 | 11.35 | 10.08 | 18.00 | 12.07 | 12.65 | 17.62 | -18.86 | -18.81 | -18.73 | -18.95 | -18.99 | -18.84 | -18.68 | -18.74 | -18.31 |
| 175 | 11.33 | 14.74 | 17.39 | 12.49 | 11.94 | 18.83 | 11.10 | 10.99 | 16.15 | -18.59 | -18.30 | -18.83 | -18.66 | -18.47 | -18.64 | -18.92 | -19.21 | -18.67 |
| 176 | 13.03 | 15.01 | 22.04 | 11.47 | 11.71 | 21.00 | 13.76 | 14.03 | 18.87 | -18.06 | -18.23 | -17.99 | -18.92 | -18.54 | -18.11 | -18.25 | -18.35 | -18.01 |
| 177 | 12.87 | 15.65 | 21.26 | 14.73 | 12.86 | 20.75 | 14.91 | 16.00 | 17.80 | -18.11 | -18.07 | -18.13 | -18.07 | -18.22 | -18.17 | -17.95 | -17.79 | -18.27 |
| 178 | 13.72 | 17.53 | 22.61 | 14.96 | 14.04 | 22.55 | 15.14 | 16.03 | 20.54 | -17.84 | -17.59 | -17.89 | -18.01 | -17.89 | -17.74 | -17.89 | -17.78 | -17.60 |
| 179 | 13.72 | 17.53 | 22.61 | 14.96 | 14.04 | 22.55 | 15.14 | 16.03 | 20.54 | -17.84 | -17.59 | -17.89 | -18.01 | -17.89 | -17.74 | -17.89 | -17.78 | -17.60 |
| 180 | 10.77 | 13.78 | 15.18 | 9.59  | 10.66 | 18.10 | 10.21 | 13.41 | 16.02 | -18.77 | -18.54 | -19.23 | -19.41 | -18.83 | -18.81 | -19.15 | -18.52 | -18.70 |
| 181 | 11.28 | 14.21 | 19.85 | 13.83 | 12.05 | 18.41 | 12.90 | 14.63 | 15.29 | -18.61 | -18.44 | -18.39 | -18.31 | -18.44 | -18.74 | -18.46 | -18.17 | -18.88 |
| 182 | 12.99 | 15.49 | 20.15 | 11.85 | 12.63 | 20.81 | 13.82 | 12.01 | 17.85 | -18.07 | -18.11 | -18.33 | -18.82 | -18.28 | -18.16 | -18.23 | -18.92 | -18.25 |
| 183 | 8.84  | 10.64 | 14.17 | 10.26 | 9.69  | 15.34 | 9.35  | 14.40 | 13.50 | -19.38 | -19.35 | -19.42 | -19.24 | -19.10 | -19.48 | -19.37 | -18.24 | -19.31 |
| 184 | 11.55 | 12.74 | 17.96 | 12.39 | 10.11 | 19.24 | 13.44 | 13.01 | 17.13 | -18.52 | -18.81 | -18.73 | -18.68 | -18.98 | -18.54 | -18.33 | -18.64 | -18.43 |
| 185 | 11.32 | 12.77 | 18.89 | 11.64 | 12.72 | 18.27 | 12.61 | 10.80 | 16.03 | -18.59 | -18.80 | -18.56 | -18.88 | -18.26 | -18.77 | -18.54 | -19.27 | -18.70 |
| 186 | 11.06 | 14.89 | 20.57 | 13.16 | 12.65 | 18.21 | 12.85 | 13.06 | 15.92 | -18.68 | -18.26 | -18.25 | -18.48 | -18.28 | -18.79 | -18.48 | -18.62 | -18.72 |
| 187 | 12.78 | 12.74 | 20.07 | 12.68 | 10.08 | 20.89 | 13.82 | 12.86 | 18.95 | -18.13 | -18.81 | -18.35 | -18.61 | -18.99 | -18.14 | -18.23 | -18.68 | -17.99 |

|     |       |       |       |       |       |       |       |       |       |        |        |        |        |        |        |        |        |        |
|-----|-------|-------|-------|-------|-------|-------|-------|-------|-------|--------|--------|--------|--------|--------|--------|--------|--------|--------|
| 188 | 10.23 | 10.64 | 18.67 | 14.15 | 12.23 | 17.32 | 13.30 | 12.65 | 14.68 | -18.94 | -19.34 | -18.60 | -18.22 | -18.39 | -19.00 | -18.36 | -18.74 | -19.03 |
| 189 | 7.90  | 14.13 | 14.17 | 13.42 | 11.95 | 12.21 | 9.35  | 9.74  | 10.53 | -19.67 | -18.45 | -19.42 | -18.41 | -18.47 | -20.23 | -19.37 | -19.57 | -20.03 |
| 190 | 8.67  | 12.14 | 17.52 | 11.64 | 12.87 | 15.31 | 10.34 | 14.14 | 14.09 | -19.43 | -18.96 | -18.81 | -18.88 | -18.22 | -19.49 | -19.12 | -18.32 | -19.17 |
| 191 | 11.56 | 13.35 | 18.30 | 12.20 | 10.72 | 19.00 | 12.07 | 13.50 | 15.57 | -18.52 | -18.65 | -18.67 | -18.73 | -18.81 | -18.60 | -18.68 | -18.50 | -18.81 |
| 192 | 7.82  | 9.68  | 19.17 | 8.01  | 8.90  | 12.46 | 7.77  | 9.62  | 11.69 | -19.70 | -19.59 | -18.51 | -19.82 | -19.31 | -20.17 | -19.77 | -19.60 | -19.75 |
| 193 | 10.18 | 13.46 | 16.67 | 10.51 | 11.12 | 15.88 | 10.55 | 10.73 | 15.16 | -18.95 | -18.63 | -18.96 | -19.17 | -18.70 | -19.35 | -19.06 | -19.29 | -18.91 |
| 194 | 11.06 | 13.32 | 17.94 | 9.68  | 10.84 | 17.98 | 12.74 | 13.62 | 15.91 | -18.68 | -18.66 | -18.73 | -19.39 | -18.78 | -18.84 | -18.50 | -18.46 | -18.73 |
| 195 | 10.55 | 13.62 | 17.86 | 12.61 | 11.29 | 18.04 | 12.09 | 13.10 | 14.90 | -18.84 | -18.59 | -18.75 | -18.63 | -18.65 | -18.83 | -18.67 | -18.61 | -18.97 |
| 196 | 9.84  | 11.40 | 13.20 | 9.63  | 11.37 | 17.83 | 9.34  | 12.47 | 12.47 | -19.06 | -19.15 | -19.59 | -19.40 | -18.63 | -18.88 | -19.37 | -18.79 | -19.56 |
| 197 | 11.36 | 14.08 | 19.28 | 12.33 | 11.41 | 18.98 | 13.02 | 13.04 | 16.91 | -18.58 | -18.47 | -18.49 | -18.70 | -18.62 | -18.60 | -18.43 | -18.63 | -18.48 |
| 198 | 10.30 | 12.53 | 17.35 | 8.65  | 11.30 | 17.50 | 11.51 | 10.88 | 14.78 | -18.92 | -18.86 | -18.84 | -19.66 | -18.65 | -18.96 | -18.82 | -19.24 | -19.00 |
| 199 | 8.00  | 12.10 | 15.06 | 12.22 | 10.84 | 14.56 | 10.37 | 11.23 | 14.26 | -19.64 | -18.97 | -19.25 | -18.73 | -18.78 | -19.67 | -19.11 | -19.14 | -19.13 |
| 200 | 10.98 | 13.13 | 18.14 | 12.29 | 8.88  | 18.58 | 12.08 | 10.67 | 15.98 | -18.70 | -18.71 | -18.70 | -18.71 | -19.32 | -18.70 | -18.67 | -19.30 | -18.71 |
| 201 | 8.84  | 10.04 | 14.81 | 6.59  | 5.63  | 15.24 | 9.42  | 9.33  | 13.41 | -19.38 | -19.50 | -19.30 | -20.19 | -20.22 | -19.50 | -19.35 | -19.68 | -19.33 |
| 202 | 9.34  | 9.71  | 15.80 | 10.39 | 10.02 | 16.22 | 10.02 | 8.99  | 14.11 | -19.22 | -19.58 | -19.12 | -19.20 | -19.00 | -19.27 | -19.20 | -19.78 | -19.16 |
| 203 | 10.15 | 15.49 | 16.73 | 11.85 | 12.64 | 17.27 | 11.58 | 13.02 | 15.34 | -18.96 | -18.11 | -18.95 | -18.82 | -18.28 | -19.01 | -18.80 | -18.63 | -18.87 |
| 204 | 8.67  | 12.61 | 18.83 | 13.34 | 13.97 | 15.31 | 11.59 | 13.53 | 14.09 | -19.43 | -18.84 | -18.57 | -18.43 | -17.91 | -19.49 | -18.80 | -18.49 | -19.17 |
| 205 | 10.42 | 13.79 | 17.70 | 12.47 | 10.96 | 17.71 | 11.70 | 11.17 | 14.26 | -18.88 | -18.54 | -18.78 | -18.66 | -18.74 | -18.91 | -18.77 | -19.16 | -19.13 |
| 206 | 8.84  | 13.58 | 14.17 | 12.65 | 11.06 | 15.34 | 9.35  | 12.84 | 13.50 | -19.38 | -18.60 | -19.42 | -18.61 | -18.72 | -19.48 | -19.37 | -18.69 | -19.31 |
| 207 | 12.24 | 14.55 | 17.52 | 11.88 | 13.30 | 19.92 | 11.53 | 14.24 | 16.84 | -18.30 | -18.35 | -18.81 | -18.81 | -18.10 | -18.37 | -18.81 | -18.29 | -18.50 |
| 208 | 8.95  | 10.32 | 14.58 | 8.01  | 8.97  | 15.54 | 9.55  | 9.62  | 12.99 | -19.34 | -19.43 | -19.34 | -19.82 | -19.30 | -19.43 | -19.32 | -19.60 | -19.44 |
| 209 | 11.35 | 13.40 | 15.02 | 9.60  | 9.59  | 18.96 | 10.59 | 12.69 | 16.46 | -18.59 | -18.64 | -19.26 | -19.41 | -19.12 | -18.61 | -19.05 | -18.73 | -18.59 |
| 210 | 11.36 | 14.08 | 19.28 | 12.33 | 11.41 | 18.98 | 13.02 | 13.04 | 16.91 | -18.58 | -18.47 | -18.49 | -18.70 | -18.62 | -18.60 | -18.43 | -18.63 | -18.48 |
| 211 | 11.87 | 14.42 | 18.99 | 13.17 | 14.26 | 19.30 | 12.96 | 12.94 | 16.26 | -18.42 | -18.38 | -18.54 | -18.48 | -17.83 | -18.52 | -18.45 | -18.66 | -18.64 |
| 212 | 10.03 | 11.40 | 16.43 | 8.70  | 10.32 | 17.37 | 10.78 | 10.01 | 14.74 | -19.00 | -19.15 | -19.01 | -19.64 | -18.92 | -18.99 | -19.00 | -19.49 | -19.01 |
| 213 | 8.03  | 9.29  | 13.30 | 7.70  | 8.90  | 14.49 | 8.37  | 9.62  | 12.22 | -19.63 | -19.69 | -19.57 | -19.90 | -19.31 | -19.68 | -19.62 | -19.60 | -19.62 |
| 214 | 12.13 | 14.08 | 18.71 | 13.27 | 14.15 | 19.02 | 12.26 | 13.30 | 16.23 | -18.34 | -18.47 | -18.59 | -18.45 | -17.86 | -18.59 | -18.63 | -18.55 | -18.65 |
| 215 | 7.90  | 10.64 | 20.95 | 10.26 | 9.69  | 12.21 | 9.35  | 9.74  | 14.14 | -19.67 | -19.35 | -18.19 | -19.24 | -19.10 | -20.23 | -19.37 | -19.57 | -19.16 |
| 216 | 9.83  | 10.24 | 12.95 | 7.40  | 7.74  | 16.23 | 9.55  | 8.34  | 12.59 | -19.07 | -19.45 | -19.64 | -19.98 | -19.63 | -19.26 | -19.32 | -19.97 | -19.53 |
| 217 | 10.25 | 12.06 | 16.97 | 10.19 | 9.08  | 17.33 | 11.75 | 11.73 | 15.65 | -18.93 | -18.98 | -18.91 | -19.26 | -19.26 | -19.00 | -18.76 | -19.00 | -18.79 |

|     |       |        |        |        |       |       |        |        |        |        |        |        |        |        |        |        |        |        |
|-----|-------|--------|--------|--------|-------|-------|--------|--------|--------|--------|--------|--------|--------|--------|--------|--------|--------|--------|
| 218 | 10.48 | 12.74  | 17.96  | 11.35  | 10.08 | 18.00 | 12.07  | 12.65  | 17.62  | -18.86 | -18.81 | -18.73 | -18.95 | -18.99 | -18.84 | -18.68 | -18.74 | -18.31 |
| 219 | 10.48 | 12.74  | 14.43  | 11.35  | 10.08 | 18.00 | 9.38   | 12.65  | 17.62  | -18.86 | -18.81 | -19.37 | -18.95 | -18.99 | -18.84 | -19.36 | -18.74 | -18.31 |
| 220 | 10.39 | 11.27  | 16.37  | 10.26  | 9.76  | 17.65 | 11.13  | 9.74   | 14.80  | -18.89 | -19.18 | -19.02 | -19.24 | -19.08 | -18.92 | -18.92 | -19.57 | -19.00 |
| 221 | 8.74  | 15.99  | 14.40  | 8.33   | 8.68  | 15.75 | 9.22   | 9.52   | 13.11  | -19.41 | -17.98 | -19.37 | -19.74 | -19.38 | -19.38 | -19.40 | -19.63 | -19.41 |
| 222 | 7.17  | 8.66   | 11.58  | 7.40   | 7.67  | 13.27 | 7.28   | 11.68  | 10.65  | -19.91 | -19.85 | -19.89 | -19.98 | -19.65 | -19.98 | -19.90 | -19.02 | -20.00 |
| 223 | 9.50  | 11.41  | 13.38  | 10.03  | 12.62 | 16.27 | 8.23   | 9.44   | 14.59  | -19.17 | -19.15 | -19.56 | -19.30 | -18.28 | -19.25 | -19.65 | -19.65 | -19.05 |
| 224 | 6.00  | 10.52  | 12.71  | 8.30   | 7.00  | 11.70 | 8.44   | 11.54  | 10.94  | -20.28 | -19.38 | -19.68 | -19.75 | -19.84 | -20.36 | -19.60 | -19.06 | -19.93 |
| 225 | 10.24 | 9.68   | 15.80  | 8.01   | 8.64  | 16.77 | 10.01  | 9.62   | 14.17  | -18.93 | -19.59 | -19.12 | -19.82 | -19.39 | -19.13 | -19.20 | -19.60 | -19.15 |
| 226 | 7.17  | 9.59   | 11.58  | 7.40   | 7.46  | 13.27 | 7.28   | 8.87   | 10.65  | -19.91 | -19.61 | -19.89 | -19.98 | -19.71 | -19.98 | -19.90 | -19.81 | -20.00 |
| 227 | 8.18  | 12.05  | 13.29  | 10.02  | 9.78  | 14.76 | 8.33   | 10.07  | 14.05  | -19.59 | -18.98 | -19.58 | -19.30 | -19.07 | -19.62 | -19.63 | -19.47 | -19.18 |
| 228 | 10.48 | 12.74  | 12.38  | 11.35  | 10.08 | 18.00 | 12.07  | 12.65  | 17.62  | -18.86 | -18.81 | -19.74 | -18.95 | -18.99 | -18.84 | -18.68 | -18.74 | -18.31 |
| 229 | 7.17  | 10.07  | 12.89  | 9.10   | 8.56  | 13.27 | 8.53   | 10.54  | 10.65  | -19.91 | -19.49 | -19.65 | -19.54 | -19.41 | -19.98 | -19.58 | -19.34 | -20.00 |
| 230 | 9.47  | 10.25  | 15.09  | 9.95   | 9.69  | 16.60 | 9.95   | 9.74   | 14.03  | -19.18 | -19.45 | -19.25 | -19.32 | -19.10 | -19.18 | -19.22 | -19.57 | -19.18 |
| 231 | 7.72  | 10.42  | 13.66  | 7.92   | 6.96  | 13.73 | 8.56   | 10.26  | 11.82  | -19.73 | -19.40 | -19.51 | -19.85 | -19.85 | -19.87 | -19.57 | -19.42 | -19.72 |
| 232 | 10.48 | 8.13   | 17.96  | 11.35  | 10.08 | 18.00 | 12.07  | 8.33   | 10.94  | -18.86 | -19.99 | -18.73 | -18.95 | -18.99 | -18.84 | -18.68 | -19.97 | -19.93 |
| 233 | 7.17  | 8.66   | 11.58  | 7.40   | 7.21  | 13.27 | 7.28   | 9.88   | 10.62  | -19.91 | -19.85 | -19.89 | -19.98 | -19.78 | -19.98 | -19.90 | -19.53 | -20.01 |
| 234 | 10.48 | 12.74  | 17.96  | 11.35  | 5.88  | 18.00 | 12.07  | 12.65  | 10.23  | -18.86 | -18.81 | -18.73 | -18.95 | -20.15 | -18.84 | -18.68 | -18.74 | -20.11 |
| 235 | 5.97  | 12.74  | 10.71  | 11.35  | 10.08 | 12.09 | 5.66   | 7.11   | 10.48  | -20.29 | -18.81 | -20.04 | -18.95 | -18.99 | -20.26 | -20.31 | -20.32 | -20.05 |
| 236 | 4.73  | 5.27   | 10.34  | 6.43   | 7.71  | 9.67  | 5.89   | 7.43   | 7.28   | -20.68 | -20.72 | -20.11 | -20.23 | -19.64 | -20.85 | -20.25 | -20.23 | -20.82 |
| 237 | 5.04  | 11.27  | 7.93   | 4.63   | 4.48  | 10.98 | 4.69   | 4.68   | 8.66   | -20.58 | -19.18 | -20.55 | -20.70 | -20.54 | -20.53 | -20.55 | -21.01 | -20.49 |
| 238 | -3.82 | -3.18  | -6.48  | -2.39  | -3.56 | -0.59 | -5.12  | 1.18   | -3.14  | -23.38 | -22.87 | -23.16 | -22.53 | -22.76 | -23.32 | -23.05 | -22.00 | -23.36 |
| 239 | -4.99 | -3.08  | -8.55  | -4.71  | -4.30 | -1.44 | -6.29  | -3.11  | -2.74  | -23.75 | -22.85 | -23.54 | -23.14 | -22.96 | -23.53 | -23.35 | -23.22 | -23.26 |
| 240 | -3.77 | -3.94  | -5.26  | -4.25  | -3.82 | -0.58 | -5.57  | -1.46  | -3.06  | -23.36 | -23.07 | -22.94 | -23.02 | -22.83 | -23.32 | -23.17 | -22.75 | -23.34 |
| 241 | -6.12 | -12.99 | -12.23 | -18.09 | -5.65 | -5.50 | -9.85  | -9.37  | -8.82  | -24.11 | -25.38 | -24.20 | -26.62 | -23.34 | -24.51 | -24.26 | -25.00 | -24.74 |
| 242 | -9.93 | -15.46 | -19.95 | -15.43 | -5.73 | -8.76 | -13.90 | -10.39 | -11.46 | -25.31 | -26.00 | -25.60 | -25.93 | -23.36 | -25.29 | -25.29 | -25.29 | -25.38 |
| 243 | 26.89 | 31.10  | 43.99  | 30.43  | 30.47 | 34.48 | 23.36  | 28.26  | 30.75  | -13.67 | -14.13 | -14.01 | -13.98 | -13.35 | -14.86 | -15.80 | -14.30 | -15.12 |
| 244 | 23.96 | 30.67  | 40.18  | 26.72  | 25.16 | 34.37 | 28.11  | 26.70  | 31.83  | -14.60 | -14.24 | -14.70 | -14.95 | -14.82 | -14.89 | -14.59 | -14.74 | -14.86 |
| 245 | 21.92 | 27.16  | 36.87  | 25.98  | 23.03 | 33.56 | 26.27  | 25.86  | 30.55  | -15.24 | -15.13 | -15.30 | -15.14 | -15.41 | -15.08 | -15.06 | -14.98 | -15.17 |
| 246 | 21.04 | 23.64  | 36.39  | 24.35  | 21.38 | 31.77 | 23.48  | 23.41  | 28.75  | -15.52 | -16.03 | -15.39 | -15.56 | -15.86 | -15.52 | -15.77 | -15.68 | -15.61 |
| 247 | 20.89 | 26.30  | 35.10  | 24.20  | 21.26 | 32.08 | 24.52  | 24.12  | 29.14  | -15.57 | -15.35 | -15.62 | -15.60 | -15.90 | -15.44 | -15.50 | -15.48 | -15.51 |



|     |       |       |       |       |       |       |       |       |       |        |        |        |        |        |        |        |        |        |
|-----|-------|-------|-------|-------|-------|-------|-------|-------|-------|--------|--------|--------|--------|--------|--------|--------|--------|--------|
| 248 | 20.20 | 30.13 | 38.58 | 25.10 | 24.30 | 35.09 | 22.50 | 26.93 | 27.11 | -15.79 | -14.37 | -14.99 | -15.37 | -15.06 | -14.71 | -16.02 | -14.68 | -16.01 |
| 249 | 20.85 | 25.49 | 34.06 | 24.30 | 22.54 | 32.23 | 23.43 | 24.36 | 28.81 | -15.58 | -15.56 | -15.81 | -15.58 | -15.54 | -15.41 | -15.78 | -15.41 | -15.59 |
| 250 | 19.88 | 22.21 | 32.99 | 23.79 | 22.16 | 30.55 | 23.42 | 23.00 | 27.72 | -15.89 | -16.39 | -16.00 | -15.71 | -15.65 | -15.81 | -15.79 | -15.80 | -15.86 |
| 251 | 17.54 | 23.95 | 30.33 | 22.33 | 20.86 | 27.66 | 20.62 | 22.29 | 25.75 | -16.63 | -15.95 | -16.48 | -16.09 | -16.01 | -16.51 | -16.50 | -16.00 | -16.33 |
| 252 | 21.04 | 25.32 | 35.40 | 23.97 | 22.32 | 32.14 | 24.64 | 25.03 | 29.66 | -15.52 | -15.60 | -15.57 | -15.66 | -15.60 | -15.43 | -15.48 | -15.22 | -15.39 |
| 253 | 19.62 | 25.44 | 33.77 | 23.98 | 21.79 | 30.06 | 23.27 | 24.22 | 26.18 | -15.97 | -15.57 | -15.86 | -15.66 | -15.75 | -15.93 | -15.82 | -15.45 | -16.23 |
| 254 | 19.95 | 25.78 | 36.77 | 26.46 | 22.64 | 30.73 | 25.14 | 25.85 | 28.36 | -15.87 | -15.48 | -15.32 | -15.01 | -15.51 | -15.77 | -15.35 | -14.98 | -15.70 |
| 255 | 19.35 | 23.24 | 31.59 | 20.22 | 19.80 | 28.75 | 21.65 | 21.70 | 25.89 | -16.06 | -16.13 | -16.26 | -16.64 | -16.30 | -16.24 | -16.24 | -16.17 | -16.30 |
| 256 | 20.99 | 23.37 | 35.48 | 23.66 | 21.04 | 31.98 | 24.96 | 23.27 | 29.48 | -15.54 | -16.10 | -15.55 | -15.74 | -15.96 | -15.47 | -15.39 | -15.72 | -15.43 |
| 257 | 19.35 | 23.99 | 33.93 | 24.43 | 21.48 | 30.07 | 21.95 | 22.80 | 27.88 | -16.06 | -15.94 | -15.83 | -15.54 | -15.84 | -15.93 | -16.16 | -15.85 | -15.82 |
| 258 | 19.49 | 23.86 | 32.47 | 21.94 | 20.81 | 29.19 | 22.17 | 22.88 | 25.55 | -16.01 | -15.97 | -16.10 | -16.19 | -16.02 | -16.14 | -16.10 | -15.83 | -16.38 |
| 259 | 19.89 | 24.38 | 32.03 | 22.95 | 22.23 | 32.15 | 21.96 | 21.14 | 28.89 | -15.89 | -15.84 | -16.18 | -15.93 | -15.63 | -15.42 | -16.16 | -16.32 | -15.57 |
| 260 | 18.23 | 24.62 | 31.36 | 23.09 | 20.17 | 28.51 | 21.65 | 23.29 | 25.63 | -16.41 | -15.78 | -16.30 | -15.89 | -16.20 | -16.30 | -16.24 | -15.71 | -16.36 |
| 261 | 18.32 | 22.92 | 30.67 | 21.21 | 19.42 | 28.14 | 20.97 | 20.87 | 25.51 | -16.38 | -16.21 | -16.42 | -16.38 | -16.40 | -16.39 | -16.41 | -16.40 | -16.39 |
| 262 | 18.32 | 22.92 | 30.67 | 21.21 | 19.42 | 28.14 | 20.97 | 20.87 | 25.51 | -16.38 | -16.21 | -16.42 | -16.38 | -16.40 | -16.39 | -16.41 | -16.40 | -16.39 |
| 263 | 16.96 | 22.06 | 27.90 | 19.51 | 17.02 | 27.63 | 19.43 | 20.27 | 24.69 | -16.81 | -16.43 | -16.93 | -16.83 | -17.07 | -16.51 | -16.80 | -16.57 | -16.59 |
| 264 | 19.61 | 23.69 | 33.16 | 21.73 | 19.82 | 30.70 | 23.06 | 23.12 | 27.83 | -15.97 | -16.02 | -15.97 | -16.25 | -16.29 | -15.77 | -15.88 | -15.76 | -15.83 |
| 265 | 17.76 | 21.01 | 29.71 | 19.93 | 18.43 | 27.50 | 20.20 | 20.21 | 24.62 | -16.56 | -16.70 | -16.60 | -16.72 | -16.68 | -16.55 | -16.60 | -16.59 | -16.61 |
| 266 | 16.84 | 21.68 | 28.72 | 21.38 | 19.28 | 26.54 | 19.83 | 20.67 | 23.94 | -16.85 | -16.53 | -16.78 | -16.34 | -16.44 | -16.78 | -16.70 | -16.46 | -16.78 |
| 267 | 16.87 | 18.93 | 29.55 | 19.33 | 17.86 | 27.09 | 19.79 | 20.92 | 24.29 | -16.84 | -17.23 | -16.63 | -16.87 | -16.84 | -16.65 | -16.71 | -16.39 | -16.69 |
| 268 | 13.76 | 20.80 | 27.28 | 19.07 | 17.14 | 26.46 | 17.01 | 19.24 | 21.41 | -17.82 | -16.75 | -17.04 | -16.94 | -17.04 | -16.80 | -17.42 | -16.86 | -17.39 |
| 269 | 15.64 | 19.89 | 27.09 | 19.22 | 18.53 | 24.52 | 18.69 | 19.42 | 21.16 | -17.23 | -16.98 | -17.07 | -16.90 | -16.65 | -17.27 | -16.99 | -16.81 | -17.45 |
| 270 | 16.88 | 20.78 | 28.61 | 19.94 | 18.33 | 26.49 | 19.54 | 19.55 | 23.77 | -16.84 | -16.76 | -16.80 | -16.71 | -16.71 | -16.79 | -16.77 | -16.77 | -16.82 |
| 271 | 16.88 | 20.78 | 28.61 | 19.94 | 18.33 | 26.49 | 19.54 | 19.55 | 23.77 | -16.84 | -16.76 | -16.80 | -16.71 | -16.71 | -16.79 | -16.77 | -16.77 | -16.82 |
| 272 | 16.29 | 19.68 | 27.11 | 19.31 | 18.09 | 26.76 | 18.29 | 19.47 | 23.74 | -17.02 | -17.04 | -17.07 | -16.88 | -16.77 | -16.72 | -17.09 | -16.80 | -16.82 |
| 273 | 15.84 | 21.50 | 27.31 | 18.57 | 18.18 | 24.90 | 18.50 | 18.74 | 22.04 | -17.17 | -16.57 | -17.03 | -17.07 | -16.75 | -17.17 | -17.04 | -17.01 | -17.24 |
| 274 | 16.45 | 20.27 | 30.17 | 20.03 | 17.98 | 26.99 | 18.48 | 19.65 | 22.96 | -16.97 | -16.89 | -16.51 | -16.69 | -16.80 | -16.67 | -17.04 | -16.75 | -17.01 |
| 275 | 15.24 | 13.64 | 26.64 | 18.48 | 16.52 | 25.08 | 18.25 | 18.92 | 22.42 | -17.36 | -18.58 | -17.15 | -17.09 | -17.21 | -17.13 | -17.10 | -16.95 | -17.14 |
| 276 | 16.68 | 21.32 | 27.24 | 18.36 | 17.57 | 25.10 | 19.16 | 18.46 | 23.36 | -16.90 | -16.62 | -17.05 | -17.13 | -16.92 | -17.12 | -16.87 | -17.09 | -16.92 |
| 277 | 13.84 | 18.85 | 25.45 | 17.43 | 15.42 | 22.99 | 16.57 | 17.96 | 21.23 | -17.80 | -17.25 | -17.37 | -17.37 | -17.51 | -17.63 | -17.53 | -17.23 | -17.43 |

|     |       |       |       |       |       |       |       |       |       |        |        |        |        |        |        |        |        |        |
|-----|-------|-------|-------|-------|-------|-------|-------|-------|-------|--------|--------|--------|--------|--------|--------|--------|--------|--------|
| 278 | 15.21 | 19.28 | 25.80 | 17.40 | 16.89 | 24.12 | 17.58 | 17.43 | 21.70 | -17.37 | -17.14 | -17.31 | -17.38 | -17.11 | -17.36 | -17.27 | -17.38 | -17.32 |
| 279 | 14.94 | 18.09 | 23.12 | 17.66 | 16.18 | 23.73 | 17.52 | 17.78 | 20.71 | -17.45 | -17.44 | -17.79 | -17.31 | -17.30 | -17.46 | -17.29 | -17.28 | -17.56 |
| 280 | 15.21 | 19.28 | 25.80 | 17.40 | 16.89 | 24.12 | 17.58 | 17.43 | 21.70 | -17.37 | -17.14 | -17.31 | -17.38 | -17.11 | -17.36 | -17.27 | -17.38 | -17.32 |
| 281 | 15.67 | 17.82 | 25.12 | 17.97 | 15.21 | 24.35 | 16.79 | 18.20 | 19.67 | -17.22 | -17.51 | -17.43 | -17.23 | -17.57 | -17.31 | -17.47 | -17.16 | -17.81 |
| 282 | 12.57 | 15.16 | 20.19 | 13.04 | 12.71 | 20.64 | 14.01 | 14.09 | 18.93 | -18.20 | -18.19 | -18.32 | -18.51 | -18.26 | -18.20 | -18.18 | -18.33 | -17.99 |
| 283 | 14.99 | 16.72 | 23.84 | 17.09 | 14.85 | 25.05 | 16.18 | 17.88 | 20.63 | -17.43 | -17.80 | -17.66 | -17.46 | -17.67 | -17.14 | -17.63 | -17.25 | -17.58 |
| 284 | 12.83 | 14.69 | 19.98 | 12.99 | 11.36 | 21.05 | 13.50 | 14.62 | 19.12 | -18.12 | -18.31 | -18.36 | -18.53 | -18.63 | -18.10 | -18.31 | -18.18 | -17.95 |
| 285 | 12.20 | 13.12 | 20.23 | 12.68 | 11.15 | 20.03 | 13.44 | 13.58 | 18.51 | -18.32 | -18.71 | -18.32 | -18.61 | -18.69 | -18.35 | -18.33 | -18.47 | -18.10 |
| 286 | 14.38 | 16.79 | 23.48 | 15.98 | 14.38 | 23.65 | 15.63 | 17.15 | 19.70 | -17.63 | -17.78 | -17.73 | -17.75 | -17.80 | -17.47 | -17.77 | -17.46 | -17.81 |
| 287 | 13.21 | 17.61 | 22.44 | 15.73 | 14.25 | 21.57 | 15.24 | 16.01 | 18.32 | -18.00 | -17.57 | -17.92 | -17.81 | -17.84 | -17.98 | -17.87 | -17.78 | -18.14 |
| 288 | 9.78  | 15.08 | 16.69 | 14.03 | 14.03 | 15.97 | 10.84 | 14.44 | 14.73 | -19.08 | -18.21 | -18.96 | -18.25 | -17.90 | -19.33 | -18.99 | -18.23 | -19.01 |
| 289 | 12.52 | 15.53 | 20.18 | 13.00 | 13.16 | 19.43 | 13.59 | 14.58 | 15.11 | -18.22 | -18.10 | -18.33 | -18.52 | -18.14 | -18.49 | -18.29 | -18.19 | -18.92 |
| 290 | 10.15 | 14.04 | 16.73 | 11.85 | 12.89 | 17.27 | 11.58 | 12.01 | 15.38 | -18.96 | -18.48 | -18.95 | -18.82 | -18.21 | -19.01 | -18.80 | -18.92 | -18.86 |
| 291 | 9.78  | 12.13 | 16.69 | 11.64 | 12.87 | 15.97 | 10.84 | 11.33 | 14.73 | -19.08 | -18.97 | -18.96 | -18.88 | -18.22 | -19.33 | -18.99 | -19.11 | -19.01 |
| 292 | 8.00  | 12.10 | 15.06 | 12.22 | 10.84 | 14.56 | 10.37 | 11.23 | 14.26 | -19.64 | -18.97 | -19.25 | -18.73 | -18.78 | -19.67 | -19.11 | -19.14 | -19.13 |
| 293 | 11.56 | 13.35 | 18.30 | 12.20 | 10.72 | 19.00 | 12.07 | 13.50 | 15.57 | -18.52 | -18.65 | -18.67 | -18.73 | -18.81 | -18.60 | -18.68 | -18.50 | -18.81 |
| 294 | 12.32 | 10.82 | 18.42 | 12.07 | 11.37 | 19.55 | 10.67 | 12.75 | 15.95 | -18.28 | -19.30 | -18.64 | -18.77 | -18.63 | -18.46 | -19.03 | -18.71 | -18.72 |
| 295 | 7.60  | 12.44 | 13.45 | 10.02 | 10.85 | 13.90 | 7.95  | 10.78 | 13.61 | -19.77 | -18.89 | -19.55 | -19.30 | -18.77 | -19.83 | -19.72 | -19.27 | -19.29 |
| 296 | 9.72  | 12.00 | 16.02 | 11.84 | 10.81 | 16.59 | 10.49 | 9.95  | 15.15 | -19.10 | -19.00 | -19.08 | -18.82 | -18.79 | -19.18 | -19.08 | -19.51 | -18.91 |
| 297 | 10.00 | 12.23 | 16.83 | 12.44 | 11.73 | 16.95 | 11.48 | 11.41 | 13.41 | -19.01 | -18.94 | -18.93 | -18.67 | -18.53 | -19.09 | -18.82 | -19.09 | -19.33 |
| 298 | 9.31  | 13.30 | 15.19 | 12.77 | 10.63 | 16.29 | 9.88  | 9.62  | 13.86 | -19.23 | -18.67 | -19.23 | -18.58 | -18.84 | -19.25 | -19.23 | -19.60 | -19.22 |
| 299 | 9.37  | 12.27 | 13.36 | 9.12  | 6.44  | 9.72  | 8.14  | 9.84  | 14.22 | -19.21 | -18.93 | -19.56 | -19.53 | -19.99 | -20.83 | -19.68 | -19.54 | -19.14 |
| 300 | 7.25  | 8.80  | 17.96 | 11.35 | 10.08 | 13.93 | 7.54  | 12.65 | 11.31 | -19.88 | -19.82 | -18.73 | -18.95 | -18.99 | -19.82 | -19.83 | -18.74 | -19.84 |
| 301 | 7.41  | 10.71 | 12.39 | 8.95  | 9.75  | 13.23 | 7.77  | 10.68 | 11.69 | -19.83 | -19.33 | -19.74 | -19.58 | -19.08 | -19.99 | -19.77 | -19.30 | -19.75 |
| 302 | -3.39 | -2.55 | -5.10 | -4.40 | -3.61 | -0.45 | -5.52 | -1.64 | -2.88 | -23.24 | -22.71 | -22.91 | -23.06 | -22.77 | -23.29 | -23.16 | -22.80 | -23.29 |

**Table S3. Continued**

| No. | Defect  |         |         |         |         |         |         |         |         | Applicability Domain |         |         |         |         |         |         |         |         |
|-----|---------|---------|---------|---------|---------|---------|---------|---------|---------|----------------------|---------|---------|---------|---------|---------|---------|---------|---------|
|     | Split 1 | Split 2 | Split 3 | Split 4 | Split 5 | Split 6 | Split 7 | Split 8 | Split 9 | Split 1              | Split 2 | Split 3 | Split 4 | Split 5 | Split 6 | Split 7 | Split 8 | Split 9 |
| 1   | 9.17    | 2.15    | 10.28   | 0.27    | 0.17    | 9.22    | 9.23    | 0.22    | 9.24    | NO                   | NO      | NO      | YES     | YES     | NO      | NO      | YES     | NO      |
| 2   | 0.11    | 6.12    | 5.18    | 0.14    | 0.09    | 3.13    | 0.14    | 7.16    | 9.13    | YES                  | NO      | YES     | YES     | YES     | NO      | YES     | NO      | NO      |
| 3   | 0.14    | 8.15    | 7.23    | 0.13    | 0.10    | 1.16    | 4.17    | 0.20    | 1.15    | YES                  | NO      | No      | YES     | YES     | YES     | YES     | YES     | YES     |
| 4   | 0.15    | 0.14    | 0.22    | 0.17    | 0.12    | 0.18    | 0.21    | 0.11    | 0.20    | YES                  | YES     | YES     | YES     | YES     | YES     | YES     | YES     | YES     |
| 5   | 0.12    | 0.09    | 0.17    | 0.11    | 0.09    | 0.14    | 0.14    | 0.09    | 0.15    | YES                  | YES     | YES     | YES     | YES     | YES     | YES     | YES     | YES     |
| 6   | 1.07    | 0.09    | 1.11    | 0.13    | 0.08    | 1.10    | 1.12    | 0.07    | 1.11    | YES                  | YES     | YES     | YES     | YES     | YES     | YES     | YES     | YES     |
| 7   | 0.15    | 0.14    | 0.21    | 0.20    | 0.12    | 0.17    | 0.20    | 0.12    | 0.19    | YES                  | YES     | YES     | YES     | YES     | YES     | YES     | YES     | YES     |
| 8   | 0.08    | 0.09    | 0.12    | 0.13    | 0.08    | 0.10    | 0.12    | 0.06    | 0.11    | YES                  | YES     | YES     | YES     | YES     | YES     | YES     | YES     | YES     |
| 9   | 0.08    | 0.09    | 0.19    | 0.08    | 0.07    | 0.10    | 0.13    | 0.09    | 0.11    | YES                  | YES     | YES     | YES     | YES     | YES     | YES     | YES     | YES     |
| 10  | 0.08    | 1.09    | 0.12    | 0.13    | 0.08    | 0.10    | 0.13    | 1.06    | 0.12    | YES                  | YES     | YES     | YES     | YES     | YES     | YES     | YES     | YES     |
| 11  | 0.08    | 0.09    | 0.12    | 0.13    | 1.08    | 0.10    | 0.13    | 1.06    | 0.11    | YES                  | YES     | YES     | YES     | YES     | YES     | YES     | YES     | YES     |
| 12  | 0.08    | 0.09    | 0.14    | 0.12    | 0.09    | 0.09    | 0.14    | 0.08    | 0.11    | YES                  | YES     | YES     | YES     | YES     | YES     | YES     | YES     | YES     |
| 13  | 0.08    | 0.09    | 0.21    | 0.08    | 0.08    | 0.10    | 0.13    | 0.09    | 0.11    | YES                  | YES     | YES     | YES     | YES     | YES     | YES     | YES     | YES     |
| 14  | 0.10    | 0.12    | 0.19    | 2.10    | 0.08    | 2.12    | 0.14    | 0.12    | 2.13    | YES                  | YES     | YES     | No      | YES     | YES     | YES     | YES     | YES     |
| 15  | 5.17    | 6.15    | 6.29    | 2.21    | 2.13    | 6.18    | 5.23    | 0.17    | 6.20    | NO                   | NO      | YES     | NO      | NO      | NO      | YES     | YES     | NO      |
| 16  | 0.13    | 0.14    | 0.27    | 0.16    | 0.12    | 0.14    | 0.22    | 0.12    | 0.17    | YES                  | YES     | YES     | YES     | YES     | YES     | YES     | YES     | YES     |

|    |       |      |       |      |      |       |       |      |       |     |     |     |     |     |     |     |     |     |
|----|-------|------|-------|------|------|-------|-------|------|-------|-----|-----|-----|-----|-----|-----|-----|-----|-----|
| 17 | 0.10  | 1.09 | 0.14  | 0.15 | 1.07 | 0.12  | 0.13  | 1.06 | 0.13  | YES |
| 18 | 14.15 | 4.16 | 15.25 | 0.31 | 0.21 | 14.21 | 14.19 | 0.27 | 14.21 | No  | No  | No  | YES | YES | No  | No  | YES | No  |
| 19 | 0.10  | 1.08 | 0.14  | 0.15 | 1.07 | 0.12  | 0.13  | 1.07 | 0.13  | YES |
| 20 | 8.16  | 1.17 | 10.25 | 5.22 | 0.17 | 9.18  | 9.23  | 0.19 | 9.19  | NO  | YES | NO  | No  | YES | NO  | NO  | YES | NO  |
| 21 | 0.06  | 0.06 | 0.09  | 0.09 | 0.06 | 0.08  | 0.09  | 0.04 | 0.09  | YES |
| 22 | 3.14  | 2.13 | 3.25  | 0.22 | 2.15 | 3.17  | 3.24  | 0.19 | 3.18  | NO  | NO  | YES | YES | NO  | NO  | YES | YES | YES |
| 23 | 0.12  | 0.09 | 0.15  | 0.13 | 0.07 | 0.13  | 0.15  | 0.06 | 0.13  | YES |
| 24 | 0.12  | 0.09 | 0.15  | 0.13 | 0.08 | 0.13  | 0.15  | 0.07 | 0.13  | YES |
| 25 | 0.06  | 0.06 | 0.12  | 0.08 | 0.07 | 0.07  | 0.10  | 0.06 | 0.08  | YES |
| 26 | 0.12  | 0.09 | 0.15  | 0.13 | 0.08 | 0.13  | 0.15  | 0.07 | 0.13  | YES |
| 27 | 6.09  | 0.12 | 6.17  | 0.15 | 0.13 | 6.12  | 6.12  | 0.17 | 6.12  | No  | YES | YES | YES | YES | No  | YES | YES | No  |
| 28 | 0.08  | 0.06 | 1.10  | 0.12 | 0.05 | 0.11  | 1.10  | 0.04 | 0.10  | YES |
| 29 | 1.06  | 0.06 | 1.08  | 0.09 | 0.05 | 1.07  | 1.08  | 0.03 | 1.08  | YES |
| 30 | 0.07  | 0.06 | 0.07  | 1.09 | 1.05 | 0.07  | 0.08  | 0.03 | 0.08  | YES |
| 31 | 0.07  | 0.06 | 0.08  | 0.09 | 0.05 | 0.07  | 0.08  | 0.03 | 0.08  | YES |
| 32 | 0.08  | 1.07 | 0.13  | 0.12 | 2.09 | 1.11  | 0.13  | 0.10 | 1.11  | YES | YES | YES | YES | NO  | YES | YES | YES | YES |
| 33 | 0.13  | 0.15 | 0.24  | 2.16 | 0.11 | 2.15  | 0.19  | 0.15 | 2.17  | YES | YES | YES | NO  | YES | YES | YES | YES | YES |
| 34 | 0.09  | 0.06 | 0.10  | 0.12 | 0.05 | 0.10  | 0.10  | 0.04 | 0.10  | YES |
| 35 | 0.09  | 0.11 | 0.20  | 0.09 | 0.08 | 0.11  | 0.13  | 0.11 | 0.11  | YES |
| 36 | 0.07  | 0.07 | 0.08  | 0.09 | 0.05 | 0.08  | 0.08  | 1.03 | 0.08  | YES |
| 37 | 0.06  | 1.06 | 0.09  | 0.09 | 0.06 | 0.08  | 0.09  | 1.04 | 0.09  | YES |
| 38 | 0.07  | 0.06 | 0.07  | 0.09 | 0.05 | 0.07  | 0.08  | 1.03 | 0.08  | YES |
| 39 | 6.20  | 5.17 | 7.32  | 0.29 | 3.17 | 6.23  | 6.25  | 3.24 | 6.25  | NO  | NO  | NO  | YES | NO  | NO  | YES | NO  | NO  |
| 40 | 0.11  | 0.14 | 0.20  | 2.11 | 0.09 | 2.14  | 0.15  | 0.14 | 2.14  | YES | YES | YES | No  | YES | YES | YES | YES | YES |
| 41 | 0.11  | 0.09 | 0.13  | 0.13 | 0.07 | 0.12  | 0.12  | 0.06 | 0.12  | YES |
| 42 | 0.13  | 0.11 | 0.25  | 0.10 | 0.10 | 0.15  | 0.17  | 0.12 | 0.16  | YES |
| 43 | 3.11  | 2.08 | 6.12  | 0.11 | 0.09 | 3.12  | 6.11  | 0.09 | 3.12  | NO  | NO  | YES | YES | YES | NO  | YES | YES | YES |
| 44 | 6.20  | 3.18 | 8.28  | 0.22 | 0.15 | 6.24  | 8.22  | 0.20 | 6.23  | NO  | NO  | NO  | YES | YES | NO  | NO  | YES | NO  |
| 45 | 5.12  | 1.12 | 5.17  | 0.19 | 1.11 | 5.16  | 5.16  | 1.11 | 4.17  | NO  | YES | YES | YES | YES | NO  | YES | YES | NO  |
| 46 | 0.10  | 0.08 | 1.14  | 0.13 | 0.06 | 0.12  | 1.12  | 0.06 | 0.12  | YES |

|    |      |      |      |      |      |      |      |      |      |     |     |     |     |     |     |     |     |     |
|----|------|------|------|------|------|------|------|------|------|-----|-----|-----|-----|-----|-----|-----|-----|-----|
| 47 | 0.06 | 0.06 | 0.08 | 0.09 | 0.05 | 0.08 | 0.08 | 0.03 | 0.08 | YES |
| 48 | 0.07 | 0.06 | 0.09 | 0.09 | 0.05 | 0.08 | 0.08 | 1.03 | 0.08 | YES |
| 49 | 0.06 | 0.06 | 0.08 | 0.09 | 0.05 | 0.08 | 0.08 | 0.03 | 0.08 | YES |
| 50 | 0.07 | 0.06 | 0.09 | 0.09 | 0.05 | 0.08 | 0.08 | 1.03 | 0.08 | YES |
| 51 | 0.06 | 0.06 | 0.08 | 0.09 | 0.05 | 0.07 | 0.08 | 1.03 | 0.08 | YES |
| 52 | 0.15 | 0.12 | 0.20 | 0.15 | 0.09 | 0.15 | 0.17 | 0.10 | 0.16 | YES |
| 53 | 0.06 | 0.06 | 0.08 | 0.09 | 0.05 | 0.08 | 0.08 | 0.03 | 0.08 | YES |
| 54 | 0.11 | 0.09 | 0.14 | 0.12 | 0.07 | 0.11 | 0.13 | 0.07 | 0.12 | YES |
| 55 | 0.19 | 0.16 | 1.27 | 0.18 | 0.11 | 0.20 | 1.21 | 0.14 | 0.21 | YES |
| 56 | 0.07 | 0.06 | 0.07 | 1.09 | 1.05 | 0.08 | 0.09 | 0.04 | 0.08 | YES |
| 57 | 0.07 | 1.06 | 1.07 | 1.09 | 0.05 | 0.08 | 0.09 | 0.03 | 1.08 | YES |
| 58 | 0.07 | 0.06 | 0.07 | 1.09 | 1.05 | 0.08 | 0.09 | 0.04 | 0.08 | YES |
| 59 | 0.07 | 1.06 | 1.07 | 1.09 | 0.05 | 0.08 | 0.09 | 0.03 | 1.08 | YES |
| 60 | 0.09 | 0.11 | 0.20 | 0.09 | 0.08 | 0.11 | 0.13 | 0.11 | 0.11 | YES |
| 61 | 0.15 | 0.13 | 0.20 | 0.15 | 0.10 | 0.14 | 0.17 | 0.11 | 0.16 | YES |
| 62 | 0.07 | 1.06 | 0.07 | 0.09 | 0.05 | 0.07 | 0.08 | 0.03 | 1.08 | YES |
| 63 | 0.11 | 0.09 | 0.16 | 0.11 | 0.07 | 0.13 | 0.12 | 0.07 | 0.14 | YES |
| 64 | 0.07 | 0.06 | 0.08 | 1.09 | 1.05 | 0.08 | 0.09 | 0.04 | 0.08 | YES |
| 65 | 0.07 | 1.06 | 1.08 | 1.09 | 0.05 | 0.08 | 0.09 | 0.03 | 1.08 | YES |
| 66 | 4.12 | 0.13 | 5.21 | 0.15 | 0.12 | 5.16 | 4.14 | 0.19 | 5.15 | NO  | YES | YES | YES | YES | NO  | YES | YES | NO  |
| 67 | 0.14 | 1.11 | 0.16 | 0.16 | 1.07 | 0.15 | 0.15 | 1.07 | 0.16 | YES |
| 68 | 0.09 | 0.10 | 0.12 | 0.11 | 0.07 | 0.11 | 0.12 | 0.06 | 0.12 | YES |
| 69 | 0.12 | 0.09 | 0.18 | 0.08 | 0.08 | 0.13 | 0.16 | 0.09 | 0.14 | YES |
| 70 | 0.07 | 1.06 | 0.08 | 0.09 | 0.05 | 0.08 | 0.09 | 1.03 | 0.09 | YES |
| 71 | 0.07 | 1.06 | 0.08 | 0.09 | 0.05 | 0.08 | 0.09 | 1.03 | 0.09 | YES |
| 72 | 0.16 | 0.11 | 0.21 | 0.12 | 0.09 | 0.17 | 0.18 | 0.09 | 0.18 | YES |
| 73 | 0.06 | 0.06 | 0.08 | 1.09 | 1.05 | 0.07 | 0.08 | 1.03 | 0.08 | YES |
| 74 | 0.06 | 0.06 | 0.08 | 0.09 | 1.05 | 0.07 | 0.08 | 0.03 | 0.08 | YES |
| 75 | 0.07 | 1.06 | 0.09 | 0.09 | 0.05 | 0.08 | 0.09 | 1.03 | 0.08 | YES |
| 76 | 0.08 | 0.07 | 0.12 | 0.10 | 0.07 | 0.10 | 0.12 | 0.06 | 0.09 | YES |

|     |       |      |       |      |      |       |       |      |       |     |     |     |     |     |     |     |     |     |
|-----|-------|------|-------|------|------|-------|-------|------|-------|-----|-----|-----|-----|-----|-----|-----|-----|-----|
| 77  | 5.14  | 0.12 | 6.18  | 1.19 | 0.10 | 5.19  | 6.16  | 1.11 | 5.18  | No  | YES | YES | YES | YES | No  | YES | YES | No  |
| 78  | 0.17  | 3.14 | 0.32  | 1.16 | 1.09 | 0.17  | 0.24  | 3.11 | 0.20  | YES | No  | YES | YES | YES | YES | YES | NO  | YES |
| 79  | 1.03  | 1.04 | 1.05  | 0.04 | 1.05 | 1.04  | 1.05  | 0.02 | 1.04  | YES |
| 80  | 0.16  | 3.12 | 0.31  | 1.16 | 1.08 | 0.17  | 0.23  | 3.10 | 0.20  | YES | NO  | YES | YES | YES | YES | YES | NO  | YES |
| 81  | 23.18 | 8.16 | 28.28 | 0.31 | 0.20 | 24.21 | 24.22 | 2.27 | 24.22 | No  | NO  | No  | YES | YES | No  | No  | No  | No  |
| 82  | 5.14  | 0.12 | 6.18  | 1.19 | 0.10 | 5.19  | 6.16  | 1.11 | 5.18  | NO  | YES | YES | YES | YES | NO  | YES | YES | NO  |
| 83  | 2.22  | 2.14 | 10.23 | 1.17 | 2.11 | 2.20  | 10.21 | 2.10 | 2.23  | YES | NO  | NO  | YES | NO  | YES | NO  | YES | YES |
| 84  | 1.05  | 0.06 | 1.07  | 0.07 | 0.05 | 1.07  | 1.06  | 0.03 | 1.07  | YES |
| 85  | 1.13  | 1.09 | 2.17  | 0.10 | 0.07 | 1.13  | 2.15  | 0.06 | 1.14  | YES |
| 86  | 1.10  | 0.10 | 1.16  | 0.15 | 0.08 | 1.11  | 1.15  | 0.09 | 1.13  | YES |
| 87  | 8.20  | 0.13 | 12.22 | 3.22 | 0.14 | 8.21  | 12.21 | 0.13 | 8.21  | NO  | YES | NO  | NO  | YES | NO  | NO  | YES | NO  |
| 88  | 0.13  | 0.09 | 0.18  | 0.15 | 0.13 | 0.14  | 0.18  | 0.17 | 0.13  | YES |
| 89  | 2.21  | 2.14 | 10.23 | 1.17 | 2.11 | 2.20  | 10.20 | 2.10 | 2.22  | YES | No  | No  | YES | NO  | YES | No  | YES | YES |
| 90  | 23.18 | 8.16 | 28.28 | 0.31 | 0.20 | 24.21 | 24.22 | 2.27 | 24.22 | NO  | NO  | NO  | YES | YES | NO  | NO  | NO  | NO  |
| 91  | 2.15  | 1.09 | 3.20  | 1.13 | 0.12 | 2.16  | 3.17  | 0.12 | 2.17  | YES |
| 92  | 0.09  | 0.08 | 0.13  | 0.12 | 0.07 | 0.10  | 0.12  | 0.07 | 0.11  | YES |
| 93  | 0.11  | 0.11 | 0.17  | 0.10 | 0.08 | 0.13  | 0.14  | 0.09 | 0.13  | YES |
| 94  | 0.08  | 0.08 | 0.14  | 0.11 | 0.07 | 0.10  | 0.13  | 0.07 | 0.11  | YES |
| 95  | 2.11  | 1.07 | 3.15  | 1.11 | 0.10 | 2.11  | 3.14  | 0.09 | 2.12  | YES |
| 96  | 0.09  | 1.07 | 0.12  | 0.11 | 3.07 | 0.11  | 0.10  | 1.09 | 0.11  | YES | YES | YES | YES | NO  | YES | YES | YES | YES |
| 97  | 0.06  | 0.07 | 0.08  | 0.10 | 0.06 | 0.08  | 0.09  | 0.04 | 0.09  | YES |
| 98  | 1.15  | 4.10 | 16.14 | 3.12 | 7.11 | 1.15  | 15.13 | 5.12 | 2.16  | YES | NO  | NO  | NO  | NO  | YES | NO  | NO  | YES |
| 99  | 0.04  | 0.06 | 0.07  | 0.08 | 0.06 | 0.05  | 0.08  | 0.04 | 0.06  | YES |
| 100 | 3.18  | 8.11 | 16.21 | 4.15 | 8.12 | 3.18  | 15.18 | 9.13 | 3.19  | NO  | YES |
| 101 | 0.12  | 0.11 | 0.17  | 0.17 | 0.11 | 0.13  | 0.18  | 0.09 | 0.15  | YES |
| 102 | 0.09  | 0.08 | 0.12  | 0.11 | 0.07 | 0.10  | 0.11  | 0.07 | 0.11  | YES |
| 103 | 0.04  | 0.05 | 0.06  | 0.04 | 0.05 | 0.05  | 0.05  | 1.02 | 0.04  | YES |
| 104 | 0.05  | 0.05 | 0.07  | 0.07 | 0.05 | 0.07  | 0.06  | 1.03 | 0.07  | YES |
| 105 | 0.12  | 0.09 | 0.17  | 0.14 | 0.08 | 0.13  | 0.14  | 0.07 | 0.14  | YES |
| 106 | 0.04  | 0.06 | 0.08  | 0.08 | 0.06 | 0.05  | 0.08  | 0.04 | 0.06  | YES |

|     |      |      |       |       |      |      |       |      |      |     |     |     |     |     |     |     |     |     |
|-----|------|------|-------|-------|------|------|-------|------|------|-----|-----|-----|-----|-----|-----|-----|-----|-----|
| 107 | 0.11 | 0.09 | 0.15  | 0.10  | 0.08 | 0.11 | 0.15  | 0.07 | 0.12 | YES |
| 108 | 0.03 | 0.05 | 0.07  | 0.04  | 0.05 | 0.04 | 0.06  | 0.03 | 0.05 | YES |
| 109 | 0.14 | 0.13 | 0.20  | 0.12  | 0.10 | 0.15 | 0.16  | 0.10 | 0.16 | YES |
| 110 | 0.09 | 0.08 | 0.12  | 0.11  | 0.07 | 0.10 | 0.11  | 0.07 | 0.11 | YES |
| 111 | 0.11 | 0.08 | 0.17  | 0.13  | 0.08 | 0.13 | 0.15  | 0.08 | 0.14 | YES |
| 112 | 0.03 | 0.04 | 0.05  | 0.04  | 0.05 | 0.04 | 0.05  | 0.02 | 0.04 | YES |
| 113 | 0.03 | 0.04 | 0.05  | 0.04  | 0.05 | 0.04 | 0.05  | 0.02 | 0.04 | YES |
| 114 | 2.06 | 3.09 | 5.08  | 11.11 | 3.08 | 2.09 | 5.09  | 0.08 | 2.10 | YES | NO  | YES | NO  | NO  | YES | YES | YES | YES |
| 115 | 0.05 | 0.05 | 0.08  | 0.07  | 0.05 | 0.07 | 0.07  | 0.03 | 0.07 | YES |
| 116 | 0.04 | 0.06 | 0.07  | 0.08  | 0.06 | 0.05 | 0.08  | 0.04 | 0.06 | YES |
| 117 | 0.09 | 0.09 | 0.14  | 0.09  | 0.08 | 0.11 | 0.12  | 0.07 | 0.11 | YES |
| 118 | 0.09 | 0.09 | 0.15  | 0.09  | 0.08 | 0.11 | 0.12  | 0.07 | 0.11 | YES |
| 119 | 0.08 | 0.07 | 0.15  | 0.09  | 0.05 | 0.09 | 0.12  | 0.05 | 0.11 | YES |
| 120 | 0.09 | 0.08 | 0.14  | 0.09  | 0.07 | 0.11 | 0.11  | 0.07 | 0.11 | YES |
| 121 | 0.07 | 0.07 | 0.12  | 0.08  | 0.06 | 0.09 | 0.10  | 0.05 | 0.09 | YES |
| 122 | 4.09 | 0.08 | 4.15  | 0.15  | 0.11 | 4.12 | 4.12  | 0.11 | 4.13 | NO  | YES | YES | YES | YES | NO  | YES | YES | NO  |
| 123 | 0.03 | 0.04 | 0.05  | 0.04  | 0.05 | 0.04 | 0.05  | 0.02 | 0.04 | YES |
| 124 | 0.06 | 0.05 | 0.07  | 0.07  | 0.05 | 0.07 | 0.07  | 0.03 | 0.07 | YES |
| 125 | 0.12 | 0.09 | 0.22  | 0.13  | 0.08 | 0.14 | 0.18  | 0.08 | 0.16 | YES |
| 126 | 8.11 | 2.08 | 10.16 | 5.15  | 0.11 | 9.13 | 9.15  | 0.12 | 9.14 | NO  | No  | NO  | NO  | YES | NO  | NO  | YES | NO  |
| 127 | 0.11 | 0.08 | 0.16  | 0.09  | 0.08 | 0.13 | 0.13  | 0.08 | 0.13 | YES |
| 128 | 0.06 | 0.07 | 4.07  | 0.09  | 0.07 | 0.08 | 4.07  | 5.05 | 0.09 | YES | NO  | YES |
| 129 | 0.13 | 0.11 | 0.20  | 0.11  | 0.09 | 0.15 | 0.15  | 0.10 | 0.16 | YES |
| 130 | 1.04 | 1.03 | 1.06  | 0.05  | 1.03 | 1.04 | 1.06  | 0.03 | 1.05 | YES |
| 131 | 6.20 | 0.12 | 12.23 | 0.24  | 0.13 | 7.20 | 12.21 | 1.17 | 7.21 | No  | YES | NO  | YES | YES | No  | No  | YES | No  |
| 132 | 6.16 | 3.17 | 10.27 | 0.19  | 0.14 | 7.17 | 8.19  | 0.25 | 7.18 | NO  | NO  | NO  | YES | YES | NO  | NO  | YES | NO  |
| 133 | 0.05 | 0.05 | 1.07  | 1.07  | 1.05 | 0.07 | 0.06  | 1.03 | 0.07 | YES |
| 134 | 0.05 | 0.04 | 0.08  | 0.05  | 0.05 | 0.06 | 0.07  | 0.03 | 0.06 | YES |
| 135 | 4.11 | 0.08 | 4.17  | 0.16  | 0.12 | 4.14 | 4.14  | 0.12 | 4.15 | NO  | YES | YES | YES | YES | NO  | YES | YES | NO  |
| 136 | 0.10 | 0.08 | 0.13  | 0.11  | 0.07 | 0.11 | 1.11  | 1.07 | 0.12 | YES |

|     |      |      |       |      |      |      |       |      |      |     |     |     |     |     |     |     |     |     |
|-----|------|------|-------|------|------|------|-------|------|------|-----|-----|-----|-----|-----|-----|-----|-----|-----|
| 137 | 1.08 | 1.07 | 2.11  | 0.07 | 0.06 | 1.09 | 2.09  | 0.05 | 1.09 | YES |
| 138 | 2.16 | 0.11 | 4.18  | 0.14 | 0.08 | 2.18 | 4.17  | 0.11 | 2.17 | YES |
| 139 | 6.16 | 0.11 | 11.17 | 0.16 | 0.11 | 6.16 | 11.14 | 0.12 | 6.16 | NO  | YES | NO  | YES | YES | NO  | NO  | YES | NO  |
| 140 | 0.13 | 0.12 | 0.20  | 1.14 | 1.10 | 0.17 | 0.17  | 2.07 | 0.19 | YES |
| 141 | 0.04 | 0.04 | 0.06  | 0.04 | 0.05 | 0.04 | 1.05  | 1.02 | 0.05 | YES |
| 142 | 0.05 | 0.06 | 0.07  | 0.08 | 0.06 | 0.05 | 1.08  | 1.04 | 0.06 | YES |
| 143 | 0.10 | 1.07 | 1.16  | 0.11 | 2.08 | 0.11 | 1.15  | 0.10 | 0.12 | YES | YES | YES | YES | NO  | YES | YES | YES | YES |
| 144 | 0.10 | 0.09 | 0.20  | 0.11 | 0.07 | 0.11 | 0.15  | 0.07 | 0.13 | YES |
| 145 | 0.06 | 0.05 | 0.07  | 0.07 | 0.05 | 0.07 | 1.06  | 1.03 | 0.08 | YES |
| 146 | 2.11 | 0.10 | 4.11  | 0.11 | 0.07 | 2.12 | 4.12  | 0.09 | 2.11 | YES |
| 147 | 0.13 | 0.12 | 0.20  | 1.14 | 1.10 | 0.18 | 0.17  | 2.06 | 0.19 | YES |
| 148 | 5.21 | 2.13 | 11.22 | 0.23 | 0.11 | 6.19 | 11.21 | 2.15 | 6.19 | NO  | NO  | NO  | YES | YES | NO  | NO  | NO  | NO  |
| 149 | 0.04 | 0.04 | 0.06  | 1.05 | 1.03 | 0.04 | 0.06  | 0.03 | 0.05 | YES |
| 150 | 0.04 | 0.06 | 0.07  | 0.08 | 1.06 | 0.05 | 0.08  | 1.04 | 0.06 | YES |
| 151 | 0.13 | 0.10 | 0.20  | 0.14 | 0.08 | 0.17 | 0.17  | 3.05 | 0.20 | YES | No  | YES |
| 152 | 0.18 | 0.13 | 0.33  | 0.20 | 0.09 | 0.19 | 0.25  | 0.12 | 0.22 | YES |
| 153 | 0.05 | 0.05 | 0.07  | 0.07 | 1.05 | 0.07 | 0.07  | 1.03 | 0.07 | YES |
| 154 | 7.14 | 5.11 | 13.13 | 0.14 | 3.09 | 7.14 | 13.12 | 3.11 | 7.14 | NO  | NO  | NO  | YES | NO  | NO  | NO  | NO  | NO  |
| 155 | 5.06 | 5.06 | 9.06  | 1.07 | 5.06 | 5.07 | 9.05  | 5.04 | 5.08 | NO  | NO  | NO  | YES | NO  | NO  | NO  | NO  | NO  |
| 156 | 0.13 | 0.12 | 0.20  | 0.14 | 0.08 | 0.18 | 0.18  | 2.07 | 0.19 | YES |
| 157 | 1.12 | 0.09 | 7.13  | 0.12 | 0.09 | 1.12 | 7.10  | 0.10 | 2.13 | YES | YES | NO  | YES | YES | YES | NO  | YES | YES |
| 158 | 0.04 | 0.04 | 0.06  | 0.05 | 0.03 | 0.05 | 0.06  | 1.03 | 0.05 | YES |
| 159 | 0.04 | 0.04 | 0.06  | 0.05 | 0.04 | 0.04 | 0.06  | 0.03 | 0.05 | YES |
| 160 | 5.29 | 1.19 | 15.28 | 1.23 | 2.12 | 5.28 | 15.27 | 0.16 | 5.29 | NO  | YES | NO  | YES | NO  | NO  | NO  | YES | NO  |
| 161 | 0.03 | 1.04 | 0.05  | 0.04 | 0.05 | 0.04 | 0.05  | 0.02 | 1.04 | YES |
| 162 | 0.07 | 2.08 | 0.13  | 1.09 | 0.09 | 0.10 | 0.11  | 0.06 | 0.11 | YES | NO  | YES |
| 163 | 0.19 | 0.12 | 5.25  | 0.20 | 0.12 | 0.20 | 5.23  | 0.19 | 0.19 | YES |
| 164 | 0.05 | 1.06 | 0.07  | 0.08 | 0.06 | 0.05 | 0.09  | 1.04 | 0.07 | YES |
| 165 | 0.04 | 0.03 | 0.06  | 0.05 | 0.03 | 0.04 | 0.06  | 0.03 | 0.05 | YES |
| 166 | 0.06 | 1.05 | 0.08  | 0.07 | 0.05 | 0.07 | 0.07  | 1.03 | 0.08 | YES |



|     |      |      |       |      |       |      |       |      |      |     |     |     |     |     |     |     |     |     |
|-----|------|------|-------|------|-------|------|-------|------|------|-----|-----|-----|-----|-----|-----|-----|-----|-----|
| 167 | 0.04 | 0.03 | 0.06  | 0.05 | 0.03  | 0.04 | 0.06  | 0.03 | 0.05 | YES |
| 168 | 0.04 | 1.03 | 0.06  | 0.05 | 1.03  | 0.04 | 0.06  | 0.03 | 0.05 | YES |
| 169 | 0.07 | 1.08 | 0.10  | 0.09 | 0.09  | 0.10 | 0.11  | 0.05 | 0.11 | YES |
| 170 | 0.06 | 0.03 | 0.09  | 0.05 | 0.04  | 0.06 | 0.08  | 0.03 | 0.07 | YES |
| 171 | 0.06 | 0.03 | 0.09  | 0.05 | 0.04  | 0.06 | 0.08  | 0.03 | 0.07 | YES |
| 172 | 0.06 | 0.03 | 0.09  | 0.05 | 0.04  | 0.06 | 0.08  | 0.03 | 0.07 | YES |
| 173 | 0.06 | 0.03 | 0.09  | 0.05 | 0.04  | 0.06 | 0.08  | 0.03 | 0.07 | YES |
| 174 | 0.04 | 0.03 | 0.06  | 0.05 | 0.03  | 0.04 | 0.06  | 0.03 | 0.05 | YES |
| 175 | 0.14 | 0.09 | 4.18  | 0.19 | 0.11  | 0.14 | 4.17  | 0.17 | 0.15 | YES |
| 176 | 0.17 | 0.10 | 4.18  | 0.17 | 2.09  | 0.18 | 4.16  | 0.13 | 0.18 | YES | YES | YES | YES | No  | YES | YES | YES | YES |
| 177 | 0.06 | 0.03 | 0.09  | 0.05 | 0.04  | 0.06 | 0.08  | 0.03 | 0.07 | YES |
| 178 | 0.14 | 0.09 | 4.18  | 0.17 | 0.10  | 0.15 | 4.18  | 0.16 | 0.14 | YES |
| 179 | 0.14 | 0.09 | 4.18  | 0.17 | 0.10  | 0.15 | 4.18  | 0.16 | 0.14 | YES |
| 180 | 0.07 | 1.05 | 0.06  | 0.06 | 0.03  | 0.06 | 0.06  | 0.07 | 0.08 | YES |
| 181 | 0.15 | 0.08 | 1.17  | 0.15 | 0.10  | 0.22 | 1.16  | 1.05 | 0.25 | YES |
| 182 | 0.08 | 1.07 | 1.13  | 0.09 | 1.09  | 0.12 | 1.14  | 0.05 | 0.14 | YES |
| 183 | 0.18 | 3.11 | 0.24  | 0.17 | 0.12  | 0.27 | 0.22  | 1.09 | 0.28 | YES | NO  | YES |
| 184 | 0.04 | 0.03 | 0.06  | 1.05 | 1.03  | 0.04 | 0.06  | 0.03 | 0.05 | YES |
| 185 | 1.14 | 0.10 | 1.15  | 0.12 | 0.10  | 1.19 | 1.15  | 0.04 | 1.24 | YES |
| 186 | 1.15 | 0.10 | 1.16  | 0.12 | 0.10  | 1.20 | 1.15  | 0.04 | 1.24 | YES |
| 187 | 0.04 | 0.03 | 0.06  | 0.05 | 0.03  | 0.05 | 1.06  | 1.03 | 0.05 | YES |
| 188 | 0.17 | 1.11 | 0.23  | 0.17 | 5.11  | 0.23 | 0.20  | 2.08 | 0.26 | YES | YES | YES | YES | NO  | YES | YES | YES | YES |
| 189 | 0.18 | 4.11 | 0.25  | 1.17 | 1.12  | 0.26 | 0.23  | 0.09 | 0.27 | YES | NO  | YES |
| 190 | 0.15 | 0.10 | 0.16  | 0.12 | 0.09  | 0.20 | 0.15  | 0.04 | 0.24 | YES |
| 191 | 0.19 | 1.14 | 15.22 | 5.17 | 10.12 | 0.20 | 15.19 | 8.14 | 1.22 | YES | YES | NO  | No  | No  | YES | NO  | NO  | YES |
| 192 | 0.16 | 0.11 | 3.18  | 2.13 | 0.11  | 0.22 | 2.17  | 2.06 | 0.22 | YES | YES | YES | No  | YES | YES | YES | YES | YES |
| 193 | 1.14 | 1.08 | 6.16  | 0.14 | 0.09  | 1.14 | 6.15  | 0.15 | 1.13 | YES |
| 194 | 1.14 | 1.08 | 7.14  | 0.11 | 2.07  | 1.14 | 7.13  | 0.10 | 1.14 | YES | YES | NO  | YES | NO  | YES | NO  | YES | YES |
| 195 | 0.18 | 1.13 | 9.23  | 0.22 | 3.16  | 1.19 | 9.21  | 3.19 | 1.21 | YES | YES | NO  | YES | NO  | YES | NO  | NO  | YES |
| 196 | 0.08 | 0.08 | 1.08  | 1.07 | 0.09  | 0.10 | 1.07  | 1.04 | 0.10 | YES |

|     |       |      |       |      |      |       |       |      |       |     |     |     |     |     |     |     |     |     |
|-----|-------|------|-------|------|------|-------|-------|------|-------|-----|-----|-----|-----|-----|-----|-----|-----|-----|
| 197 | 0.06  | 0.04 | 0.09  | 0.06 | 1.03 | 0.06  | 0.07  | 0.03 | 0.06  | YES |
| 198 | 4.12  | 2.07 | 9.11  | 0.14 | 4.08 | 4.13  | 9.11  | 0.10 | 4.14  | NO  | NO  | NO  | YES | NO  | NO  | NO  | YES | NO  |
| 199 | 0.13  | 0.09 | 19.12 | 0.17 | 0.16 | 0.15  | 19.12 | 0.14 | 0.13  | YES | YES | No  | YES | YES | YES | No  | YES | YES |
| 200 | 6.25  | 7.15 | 16.26 | 6.19 | 0.11 | 7.25  | 15.23 | 0.13 | 8.26  | NO  | NO  | NO  | NO  | YES | NO  | NO  | YES | NO  |
| 201 | 0.13  | 0.09 | 24.12 | 0.18 | 2.15 | 0.14  | 24.12 | 0.18 | 0.12  | YES | YES | NO  | YES | No  | YES | NO  | YES | YES |
| 202 | 2.08  | 0.06 | 2.05  | 3.08 | 0.03 | 2.07  | 2.06  | 5.09 | 2.08  | YES | YES | YES | NO  | YES | YES | YES | No  | YES |
| 203 | 0.08  | 1.07 | 0.13  | 0.10 | 0.09 | 0.12  | 0.14  | 1.05 | 0.14  | YES |
| 204 | 0.15  | 0.10 | 0.16  | 0.11 | 0.10 | 0.20  | 0.16  | 0.04 | 0.24  | YES |
| 205 | 0.14  | 0.10 | 19.12 | 0.16 | 0.16 | 0.16  | 19.12 | 1.14 | 0.13  | YES | YES | NO  | YES | YES | YES | NO  | YES | YES |
| 206 | 0.18  | 4.11 | 0.24  | 1.17 | 0.12 | 0.27  | 0.22  | 0.10 | 0.28  | YES | NO  | YES |
| 207 | 0.16  | 0.08 | 2.17  | 1.15 | 0.09 | 0.22  | 2.16  | 0.05 | 0.25  | YES |
| 208 | 1.16  | 0.11 | 3.18  | 2.13 | 0.11 | 1.23  | 3.16  | 2.06 | 1.23  | YES | YES | YES | NO  | YES | YES | YES | YES | YES |
| 209 | 0.07  | 1.05 | 0.06  | 0.06 | 0.03 | 0.07  | 1.06  | 1.07 | 0.08  | YES |
| 210 | 0.06  | 0.04 | 0.09  | 0.06 | 1.03 | 0.06  | 0.07  | 0.03 | 0.06  | YES |
| 211 | 0.08  | 1.08 | 0.13  | 0.09 | 0.07 | 0.12  | 0.14  | 0.06 | 0.14  | YES |
| 212 | 12.09 | 0.05 | 25.09 | 0.10 | 5.07 | 12.08 | 25.08 | 6.10 | 12.08 | NO  | YES | NO  | YES | NO  | NO  | NO  | No  | NO  |
| 213 | 1.16  | 1.11 | 3.18  | 3.13 | 0.11 | 1.23  | 3.16  | 2.06 | 1.23  | YES | YES | YES | NO  | YES | YES | YES | YES | YES |
| 214 | 0.15  | 0.10 | 0.17  | 0.12 | 0.10 | 0.20  | 0.15  | 0.05 | 0.24  | YES |
| 215 | 0.18  | 3.11 | 1.25  | 0.16 | 0.12 | 0.26  | 0.23  | 0.09 | 0.27  | YES | NO  | YES |
| 216 | 1.14  | 0.09 | 2.15  | 0.12 | 0.10 | 1.19  | 2.14  | 0.04 | 1.23  | YES |
| 217 | 0.04  | 1.03 | 0.07  | 0.05 | 0.04 | 0.05  | 0.06  | 1.03 | 0.05  | YES |
| 218 | 0.04  | 0.03 | 0.06  | 0.05 | 0.03 | 0.04  | 0.06  | 0.03 | 0.05  | YES |
| 219 | 0.04  | 0.03 | 1.06  | 0.05 | 0.03 | 0.04  | 1.06  | 0.03 | 0.05  | YES |
| 220 | 1.18  | 3.12 | 1.24  | 0.17 | 0.12 | 1.27  | 1.22  | 0.09 | 1.28  | YES | NO  | YES |
| 221 | 2.26  | 0.14 | 11.29 | 0.20 | 1.15 | 2.30  | 11.24 | 1.14 | 2.33  | YES | YES | NO  | YES | YES | YES | NO  | YES | YES |
| 222 | 0.14  | 0.09 | 1.15  | 0.12 | 0.10 | 0.20  | 1.14  | 0.05 | 0.24  | YES |
| 223 | 0.11  | 1.06 | 5.13  | 0.13 | 2.08 | 0.11  | 5.14  | 1.15 | 0.11  | YES | YES | YES | YES | No  | YES | YES | YES | YES |
| 224 | 0.13  | 0.09 | 23.13 | 0.18 | 1.16 | 0.14  | 23.13 | 0.18 | 0.12  | YES | YES | NO  | YES | YES | YES | NO  | YES | YES |
| 225 | 0.16  | 0.11 | 3.18  | 2.13 | 1.11 | 0.23  | 3.16  | 2.06 | 0.23  | YES | YES | YES | No  | YES | YES | YES | YES | YES |
| 226 | 0.14  | 0.09 | 1.15  | 0.12 | 0.10 | 0.20  | 1.14  | 0.04 | 0.24  | YES |

|     |       |      |       |      |      |       |       |       |       |     |     |     |     |     |     |     |     |     |
|-----|-------|------|-------|------|------|-------|-------|-------|-------|-----|-----|-----|-----|-----|-----|-----|-----|-----|
| 227 | 15.11 | 0.09 | 18.05 | 7.10 | 2.02 | 15.08 | 19.04 | 18.09 | 15.10 | NO  | YES | NO  |
| 228 | 0.04  | 0.03 | 1.06  | 0.05 | 0.03 | 0.04  | 0.06  | 0.03  | 0.05  | YES |
| 229 | 0.14  | 0.09 | 1.16  | 0.12 | 0.11 | 0.20  | 1.15  | 0.05  | 0.24  | YES |
| 230 | 1.18  | 4.11 | 1.24  | 1.17 | 0.12 | 1.27  | 1.22  | 0.09  | 1.28  | YES | NO  | YES |
| 231 | 0.13  | 0.09 | 23.13 | 0.18 | 1.15 | 0.14  | 23.12 | 0.18  | 0.12  | YES | YES | NO  | YES | YES | YES | NO  | YES | YES |
| 232 | 0.04  | 1.03 | 0.06  | 0.05 | 0.03 | 0.04  | 0.06  | 1.03  | 1.05  | YES |
| 233 | 0.14  | 0.09 | 1.15  | 0.12 | 0.10 | 0.20  | 1.14  | 1.04  | 0.24  | YES |
| 234 | 0.04  | 0.03 | 0.06  | 0.05 | 1.03 | 0.04  | 0.06  | 0.03  | 1.05  | YES |
| 235 | 1.04  | 0.03 | 1.06  | 0.05 | 0.03 | 1.04  | 1.06  | 1.03  | 1.05  | YES |
| 236 | 0.10  | 2.08 | 0.15  | 0.09 | 0.09 | 0.15  | 0.15  | 0.06  | 0.17  | YES | NO  | YES |
| 237 | 5.13  | 1.07 | 13.13 | 2.16 | 3.11 | 5.13  | 13.12 | 2.16  | 5.12  | NO  | YES | NO  |
| 238 | 4.11  | 0.08 | 6.14  | 0.16 | 0.09 | 4.13  | 6.12  | 0.11  | 5.14  | No  | YES | YES | YES | YES | No  | YES | YES | No  |
| 239 | 0.06  | 0.04 | 2.08  | 0.07 | 0.03 | 0.07  | 2.06  | 0.04  | 1.08  | YES |
| 240 | 0.11  | 0.08 | 2.15  | 0.10 | 0.05 | 0.12  | 2.11  | 0.07  | 1.13  | YES |
| 241 | 16.06 | 0.06 | 18.05 | 0.07 | 0.03 | 16.06 | 18.05 | 16.04 | 16.07 | No  | YES | NO  | YES | YES | No  | No  | NO  | No  |
| 242 | 23.06 | 0.07 | 23.04 | 0.07 | 0.02 | 23.06 | 25.04 | 23.04 | 23.07 | NO  | YES | NO  | YES | YES | NO  | NO  | NO  | NO  |
| 243 | 2.16  | 4.14 | 4.22  | 0.22 | 0.15 | 2.21  | 3.21  | 0.15  | 2.22  | YES | NO  | YES |
| 244 | 0.15  | 0.14 | 0.21  | 0.20 | 0.12 | 0.17  | 0.20  | 0.12  | 0.19  | YES |
| 245 | 1.06  | 0.07 | 1.09  | 0.09 | 0.06 | 1.08  | 1.09  | 0.04  | 1.08  | YES |
| 246 | 0.09  | 0.09 | 0.19  | 0.07 | 0.07 | 0.10  | 1.13  | 1.09  | 0.11  | YES |
| 247 | 1.07  | 0.07 | 1.07  | 0.09 | 0.05 | 1.07  | 1.08  | 0.03  | 1.08  | YES |
| 248 | 1.16  | 0.13 | 4.22  | 0.19 | 0.13 | 1.18  | 4.20  | 0.14  | 1.19  | YES |
| 249 | 0.07  | 0.06 | 0.09  | 0.09 | 0.05 | 0.08  | 0.09  | 0.03  | 0.08  | YES |
| 250 | 0.06  | 0.07 | 0.09  | 0.09 | 1.06 | 0.08  | 0.09  | 1.04  | 0.09  | YES |
| 251 | 0.06  | 0.06 | 0.08  | 1.09 | 1.05 | 0.07  | 0.08  | 0.03  | 0.08  | YES |
| 252 | 0.09  | 0.11 | 0.21  | 0.09 | 0.08 | 0.11  | 0.14  | 0.11  | 0.12  | YES |
| 253 | 0.10  | 0.08 | 1.14  | 0.13 | 0.06 | 0.12  | 1.12  | 0.06  | 0.12  | YES |
| 254 | 5.12  | 1.10 | 5.17  | 0.19 | 1.10 | 5.17  | 5.15  | 1.08  | 4.18  | NO  | YES | YES | YES | YES | NO  | YES | YES | NO  |
| 255 | 0.19  | 0.16 | 0.27  | 0.18 | 0.12 | 0.19  | 0.22  | 0.14  | 0.21  | YES |
| 256 | 0.10  | 0.11 | 0.20  | 0.09 | 0.08 | 0.11  | 1.13  | 1.10  | 0.12  | YES |

|     |      |      |       |      |      |      |       |      |      |     |     |     |     |     |     |     |     |     |
|-----|------|------|-------|------|------|------|-------|------|------|-----|-----|-----|-----|-----|-----|-----|-----|-----|
| 257 | 0.06 | 0.06 | 0.09  | 0.08 | 0.06 | 0.07 | 0.09  | 0.04 | 0.07 | YES |
| 258 | 0.14 | 0.12 | 1.21  | 0.15 | 0.09 | 0.15 | 1.17  | 0.10 | 0.16 | YES |
| 259 | 0.14 | 7.18 | 6.26  | 0.14 | 0.11 | 0.17 | 4.18  | 0.22 | 0.17 | YES | NO  | YES |
| 260 | 1.15 | 1.09 | 5.18  | 0.21 | 1.12 | 2.16 | 5.19  | 0.17 | 2.16 | YES |
| 261 | 5.14 | 0.12 | 6.18  | 1.19 | 0.10 | 5.19 | 6.16  | 1.11 | 5.18 | No  | YES | YES | YES | YES | No  | YES | YES | No  |
| 262 | 5.14 | 0.12 | 6.18  | 1.19 | 0.10 | 5.19 | 6.16  | 1.11 | 5.18 | NO  | YES | YES | YES | YES | NO  | YES | YES | NO  |
| 263 | 1.04 | 0.07 | 1.06  | 0.08 | 0.06 | 1.05 | 1.08  | 0.04 | 1.06 | YES |
| 264 | 0.09 | 0.08 | 0.12  | 0.10 | 0.07 | 0.09 | 0.12  | 0.06 | 0.10 | YES |
| 265 | 8.20 | 0.13 | 12.22 | 3.22 | 0.14 | 8.21 | 12.21 | 0.13 | 8.21 | No  | YES | No  | NO  | YES | No  | No  | YES | No  |
| 266 | 0.03 | 0.05 | 0.05  | 1.04 | 1.05 | 0.04 | 0.05  | 0.03 | 0.04 | YES |
| 267 | 0.09 | 0.08 | 0.14  | 0.07 | 0.06 | 0.10 | 0.12  | 0.06 | 0.11 | YES |
| 268 | 0.10 | 1.06 | 2.11  | 0.10 | 0.08 | 0.11 | 2.11  | 0.08 | 0.11 | YES |
| 269 | 0.09 | 0.07 | 0.11  | 0.12 | 0.06 | 0.12 | 0.10  | 0.05 | 0.12 | YES |
| 270 | 0.05 | 0.05 | 0.07  | 0.07 | 0.05 | 0.07 | 0.07  | 0.03 | 0.07 | YES |
| 271 | 0.05 | 0.05 | 0.07  | 0.07 | 0.05 | 0.07 | 0.07  | 0.03 | 0.07 | YES |
| 272 | 0.04 | 0.06 | 0.07  | 0.08 | 0.06 | 0.05 | 0.08  | 0.04 | 0.06 | YES |
| 273 | 2.15 | 5.15 | 6.27  | 3.17 | 1.12 | 3.17 | 4.19  | 5.18 | 5.17 | YES | NO  | YES | NO  | YES | NO  | YES | NO  | NO  |
| 274 | 0.13 | 0.09 | 0.21  | 0.14 | 0.07 | 0.14 | 0.17  | 0.08 | 0.16 | YES |
| 275 | 0.19 | 0.17 | 0.27  | 0.16 | 0.12 | 0.19 | 0.21  | 0.14 | 0.20 | YES |
| 276 | 1.09 | 1.07 | 2.11  | 0.07 | 0.06 | 1.09 | 2.10  | 0.05 | 1.10 | YES |
| 277 | 0.09 | 0.08 | 1.12  | 1.11 | 1.07 | 0.10 | 0.11  | 1.07 | 0.11 | YES |
| 278 | 4.09 | 0.08 | 4.12  | 0.13 | 0.09 | 4.13 | 4.11  | 0.07 | 4.13 | NO  | YES | YES | YES | YES | NO  | YES | YES | NO  |
| 279 | 0.03 | 0.04 | 0.05  | 1.04 | 1.05 | 0.04 | 0.06  | 0.03 | 0.05 | YES |
| 280 | 4.09 | 0.08 | 4.12  | 0.13 | 0.09 | 4.13 | 4.11  | 0.07 | 4.13 | No  | YES | YES | YES | YES | No  | YES | YES | No  |
| 281 | 0.13 | 0.12 | 0.21  | 0.14 | 0.08 | 0.18 | 0.17  | 3.06 | 0.19 | YES | No  | YES |
| 282 | 0.04 | 0.04 | 0.06  | 0.05 | 0.04 | 0.04 | 0.06  | 0.03 | 0.05 | YES |
| 283 | 0.14 | 0.11 | 0.22  | 0.14 | 0.10 | 0.19 | 0.18  | 2.07 | 0.21 | YES |
| 284 | 0.04 | 0.04 | 0.07  | 0.05 | 0.04 | 0.04 | 0.06  | 0.03 | 0.05 | YES |
| 285 | 0.04 | 0.03 | 0.06  | 0.05 | 0.03 | 0.04 | 0.06  | 0.03 | 0.05 | YES |
| 286 | 0.13 | 0.12 | 3.17  | 0.14 | 0.10 | 0.16 | 3.15  | 0.14 | 0.16 | YES |

|     |       |      |       |      |       |       |       |       |       |     |     |     |     |     |     |     |     |     |
|-----|-------|------|-------|------|-------|-------|-------|-------|-------|-----|-----|-----|-----|-----|-----|-----|-----|-----|
| 287 | 6.17  | 0.11 | 12.17 | 0.21 | 0.10  | 7.16  | 12.17 | 1.14  | 7.16  | NO  | YES | NO  | YES | YES | NO  | NO  | YES | NO  |
| 288 | 0.14  | 1.10 | 0.15  | 1.12 | 0.10  | 0.19  | 0.15  | 0.04  | 0.24  | YES |
| 289 | 0.19  | 0.14 | 15.23 | 5.16 | 10.12 | 0.21  | 15.20 | 8.16  | 0.23  | YES | YES | NO  | NO  | No  | YES | NO  | No  | YES |
| 290 | 0.08  | 1.08 | 0.13  | 0.10 | 0.09  | 0.12  | 0.14  | 0.06  | 0.14  | YES |
| 291 | 0.14  | 0.10 | 0.15  | 0.12 | 0.09  | 0.19  | 0.15  | 0.04  | 0.24  | YES |
| 292 | 0.13  | 0.09 | 19.12 | 0.17 | 0.16  | 0.15  | 19.12 | 0.14  | 0.13  | YES | YES | No  | YES | YES | YES | No  | YES | YES |
| 293 | 0.19  | 1.14 | 15.22 | 5.17 | 10.12 | 0.20  | 15.19 | 8.14  | 1.22  | YES | YES | NO  | NO  | NO  | YES | NO  | No  | YES |
| 294 | 0.09  | 0.07 | 0.15  | 4.10 | 0.05  | 0.10  | 0.12  | 7.06  | 7.11  | YES | YES | YES | NO  | YES | YES | YES | NO  | NO  |
| 295 | 15.10 | 0.09 | 18.05 | 7.10 | 2.02  | 15.08 | 18.04 | 17.09 | 15.10 | No  | YES | No  |
| 296 | 0.13  | 0.09 | 19.12 | 0.17 | 0.16  | 0.15  | 19.12 | 0.14  | 0.13  | YES | YES | NO  | YES | YES | YES | NO  | YES | YES |
| 297 | 2.10  | 0.06 | 2.08  | 3.08 | 0.03  | 2.09  | 2.07  | 5.09  | 2.10  | YES | YES | YES | NO  | YES | YES | YES | NO  | YES |
| 298 | 1.16  | 1.11 | 3.18  | 2.14 | 1.11  | 1.23  | 3.16  | 2.06  | 1.23  | YES | YES | YES | NO  | YES | YES | YES | YES | YES |
| 299 | 0.07  | 0.05 | 14.06 | 7.09 | 0.06  | 0.08  | 7.06  | 10.04 | 0.08  | YES | YES | NO  | NO  | YES | YES | NO  | NO  | YES |
| 300 | 1.04  | 1.03 | 0.06  | 0.05 | 0.03  | 1.04  | 1.06  | 0.03  | 1.05  | YES |
| 301 | 0.16  | 0.11 | 2.18  | 3.13 | 1.11  | 0.23  | 2.16  | 2.06  | 0.23  | YES | YES | YES | NO  | YES | YES | YES | YES | YES |
| 302 | 0.08  | 0.06 | 2.12  | 0.08 | 0.04  | 0.10  | 2.09  | 0.06  | 1.11  | YES |

**Table S4.** The correlation weights assigned to each attribute incorporated in the model for Split#1 based on TF2

|         |          |
|---------|----------|
| SAk     | CW(SAk)  |
| \$0     | -4.87058 |
| \$100   | 0.76751  |
| \$1,000 | 0.28427  |
| #####   | -1.22714 |
| #####   | 1.66335  |
| #####   | 0.71374  |
| #####   | 1.95006  |
| #####   | -0.91024 |

|               |          |
|---------------|----------|
| #####         | -0.91566 |
| #####         | 0.16567  |
| #####         | -1.35489 |
| (...C...(...  | -0.37126 |
| (...F...(...  | -1.34721 |
| (...Cl...(... | -0.04476 |
| (...N...(...  | 0        |
| (...O...(...  | 0.13731  |
| (F..=)..2.1.  | 1.8553   |
| (F..=)..3.1.  | 0        |
| (F..=)..4.1.  | -0.20982 |
| (Cl.=)..1.1.  | 2.08439  |
| (Cl.=)..2.1.  | 0        |
| (Cl.=)..3.1.  | -0.53081 |
| (Cl.=)..4.1.  | 2.79869  |
| (N..=)..1.1.  | -1.00617 |
| (N..O)..1.2.  | 0.25562  |
| (O..=)..1.1.  | 1.19481  |
| (O..=)..1.2.  | 0.46476  |
| (O..=)..2.1.  | 0.04739  |
| (O..=)..2.2.  | 0.24734  |
| /...C...(...  | -0.87813 |
| 1...C...(...  | -0.49437 |
| 1...c...(...  | 1.08295  |
| 2...C...(...  | 1.64741  |
| 2...C...1...  | 0.06723  |
| 2...c...1...  | 1.92647  |
| =...C...(...  | -0.10032 |
| =...C.../...  | -0.72549 |
| =...C...1...  | 1.02736  |

|              |          |
|--------------|----------|
| =...C...2... | 0        |
| =...O...(... | 0.53846  |
| C...(...(... | -0.36842 |
| C...(...1... | 0.556    |
| C...(...=... | -0.63553 |
| C...(...C... | 1.25512  |
| C.../...C... | 1.55608  |
| C...1...(... | -0.16165 |
| C...1...=... | 0        |
| C...1...C... | 1.36285  |
| C...2...C... | 0.81921  |
| C...=...(... | -1.0022  |
| C...=...1... | 0        |
| C...=...C... | -0.33355 |
| C...C...#... | 0.43657  |
| C...C...(... | -0.49816 |
| C...C.../... | -0.61443 |
| C...C...1... | 1.9406   |
| C...C...2... | 2.37493  |
| C...C...=... | 0.35034  |
| C...C...C... | -0.10756 |
| C...N...(... | 0        |
| C...N...C... | 0.60359  |
| C...O...(... | -3.14377 |
| C...O...1... | 0        |
| C...O...C... | 0.46268  |
| C...\...(... | 0        |
| C...\...C... | 1.018    |
| C...c...1... | -1.68973 |
| BOND00000000 | -1.90927 |

|              |          |
|--------------|----------|
| BOND01000000 | -1.22786 |
| BOND10000000 | 3.13365  |
| F...(...(... | -0.88865 |
| F...(...=... | 0        |
| F...(...C... | -0.34817 |
| F...(...F... | -0.39603 |
| F...C...(... | 0        |
| F...C...=... | -0.63512 |
| EC2-C...10.. | 0.034    |
| EC2-C...12.. | 0.27342  |
| EC2-C...13.. | -0.73082 |
| EC2-C...14.. | 0.67107  |
| EC2-C...15.. | 1.92945  |
| EC2-C...16.. | -0.23342 |
| EC2-C...17.. | -0.2938  |
| EC2-C...18.. | -0.12251 |
| EC2-C...19.. | -0.14058 |
| EC2-C...20.. | -0.15222 |
| EC2-C...21.. | 0.68487  |
| EC2-C...22.. | -0.29306 |
| EC2-C...23.. | 0.06171  |
| EC2-C...24.. | 1.0845   |
| EC2-C...25.. | 0.24797  |
| EC2-C...26.. | 0.34052  |
| EC2-C...27.. | 0.69309  |
| EC2-C...28.. | -0.10785 |
| EC2-C...29.. | 0.47508  |
| EC2-C...30.. | -0.55496 |
| EC2-C...31.. | 1.97682  |
| EC2-C...32.. | 0.19372  |



|              |          |
|--------------|----------|
| EC2-C...33.. | -0.40521 |
| EC2-C...34.. | 0.59948  |
| EC2-C...35.. | -1.16028 |
| EC2-C...36.. | -0.82338 |
| EC2-C...37.. | 1.74603  |
| EC2-C...38.. | 0        |
| EC2-C...39.. | -0.24761 |
| EC2-C...43.. | 3.24458  |
| EC2-C...44.. | 1.14685  |
| EC2-F...10.. | 1.20127  |
| EC2-F...4... | 0.42984  |
| EC2-F...5... | 0.22746  |
| EC2-F...6... | 0.90671  |
| EC2-F...8... | -0.2096  |
| EC2-H...10.. | -0.46697 |
| EC2-H...11.. | 0        |
| EC2-H...12.. | -0.63468 |
| EC2-H...13.. | -0.74703 |
| EC2-H...3... | -0.83162 |
| EC2-H...4... | 0.84859  |
| EC2-H...5... | -0.49541 |
| EC2-H...6... | 0.28657  |
| EC2-H...7... | -0.10692 |
| EC2-H...8... | -0.32171 |
| EC2-H...9... | 0.07068  |
| EC2-Cl..20.. | -0.32367 |
| EC2-Cl..21.. | -0.60491 |
| EC2-Cl..22.. | 0        |
| EC2-Cl..23.. | -0.32336 |
| EC2-Cl..24.. | 1.63359  |

|              |          |
|--------------|----------|
| EC2-Cl..26.. | -0.09605 |
| EC2-N...10.. | 1.48984  |
| EC2-N...11.. | -0.05456 |
| EC2-N...14.. | 0        |
| EC2-N...17.. | 0        |
| EC2-N...18.. | 0.97203  |
| EC2-N...20.. | 0        |
| EC2-N...21.. | 0        |
| EC2-N...23.. | 0        |
| EC2-N...26.. | 0        |
| EC2-O...10.. | 1.59701  |
| EC2-O...11.. | 1.63845  |
| EC2-O...12.. | 0.52193  |
| EC2-O...13.. | 0.02373  |
| EC2-O...14.. | 0        |
| EC2-O...15.. | -0.14618 |
| EC2-O...5... | -0.14597 |
| EC2-O...6... | -0.31361 |
| EC2-O...7... | 0.22172  |
| EC2-O...8... | -1.91859 |
| EC2-O...9... | -0.21062 |
| Cl..(...=... | 0.59764  |
| Cl..(...C... | 0.6405   |
| Cl..(...Cl.. | 1.03478  |
| Cl../...C... | 0        |
| Cl..C...(... | -1.5333  |
| Cl..C.../... | 0        |
| Cl..C...=... | -0.45856 |
| Cl..C...C... | 0        |
| Cl..\...C... | 0        |

|              |          |
|--------------|----------|
| HALO00000000 | 1.85347  |
| HALO01000000 | -0.57449 |
| HALO10000000 | -0.08207 |
| N...#...C... | 1.26686  |
| N...(..C...  | 0        |
| N...C...C... | 0        |
| N...O...C... | 1.25327  |
| O...(...(... | 0.906    |
| O...(..C...  | 2.02608  |
| O...(..O...  | -2.73463 |
| O...1...C... | 0        |
| O...=...(... | 2.99565  |
| O...=...C... | -1.3697  |
| O...=...N... | 0.20482  |
| O...C...(... | -1.15392 |
| O...C.../... | -2.6995  |
| O...C...=... | 0.73155  |
| O...C...C... | 1.3803   |
| O...N...=... | -0.19816 |
| NNC-C...211. | -0.12136 |
| NNC-C...303. | -0.34849 |
| NNC-C...312. | 0.74515  |
| NNC-C...321. | -0.08638 |
| NNC-C...330. | 0.47991  |
| NNC-C...404. | -0.56124 |
| NNC-C...413. | -0.70805 |
| NNC-C...422. | -0.50088 |
| NNC-C...431. | -0.63754 |
| NNC-C...440. | 0.88883  |
| NNC-F...101. | -0.95309 |

|              |          |
|--------------|----------|
| NNC-F...110. | -0.31363 |
| NNC-F...211. | -0.54067 |
| NNC-H...101. | 0.41658  |
| NNC-H...110. | 0.42327  |
| NNC-Cl.404.  | -0.15105 |
| NNC-Cl.413.  | -0.82771 |
| NNC-N...202. | 0.08238  |
| NNC-N...211. | -0.36675 |
| NNC-N...303. | 0.53127  |
| NNC-N...312. | 0        |
| NNC-N...321. | 0.59136  |
| NNC-N...330. | 0        |
| NNC-O...110. | -1.5942  |
| NNC-O...202. | 0.35037  |
| NNC-O...211. | 0.02636  |
| NNC-O...220. | 1.72537  |
| NOSP00000000 | 1.56004  |
| NOSP01000000 | -0.6214  |
| NOSP10000000 | 0.62097  |
| NOSP11000000 | 1.60138  |
| PT2-C...1... | -1.27879 |
| PT2-C...11.. | 1.14079  |
| PT2-C...12.. | 0.70266  |
| PT2-C...2... | 0.62337  |
| PT2-C...3... | 0.40425  |
| PT2-C...4... | -0.55674 |
| PT2-C...5... | 0.90665  |
| PT2-C...6... | -0.0155  |
| PT2-C...7... | 0.65445  |
| PT2-C...8... | -0.43826 |

|              |          |
|--------------|----------|
| PT2-C...9... | -0.43269 |
| PT2-F...1... | 1.16285  |
| PT2-F...2... | 0.68167  |
| PT2-F...3... | -0.88279 |
| PT2-H...1... | 0.35512  |
| PT2-H...2... | 0.19754  |
| PT2-H...3... | -0.24549 |
| PT2-Cl..2... | -0.16531 |
| PT2-Cl..3... | 1.62863  |
| PT2-Cl..5... | 0.65775  |
| PT2-Cl..6... | 0        |
| PT2-N...1... | -0.43716 |
| PT2-N...2... | 0.85523  |
| PT2-N...3... | -0.77866 |
| PT2-N...5... | 0        |
| PT2-N...6... | 0.4847   |
| PT2-N...8... | 0        |
| PT2-N...9... | 0        |
| PT2-O...1... | -1.00981 |
| PT2-O...2... | -1.18837 |
| PT2-O...3... | -0.46266 |
| PT2-O...4... | 1.22108  |
| PT2-O...5... | 0.20279  |
| PT2-O...6... | 0        |
| PT3-C...0... | -1.96749 |
| PT3-C...1... | -0.25816 |
| PT3-C...10.. | 0.26506  |
| PT3-C...11.. | 0.78902  |
| PT3-C...12.. | -1.13878 |
| PT3-C...13.. | 1.19657  |

|              |          |
|--------------|----------|
| PT3-C...14.. | 0        |
| PT3-C...15.. | 1.31941  |
| PT3-C...18.. | 2.45654  |
| PT3-C...2... | -0.21918 |
| PT3-C...20.. | 0.04322  |
| PT3-C...3... | -0.69985 |
| PT3-C...4... | 0.20116  |
| PT3-C...5... | 0.54037  |
| PT3-C...6... | 0.54679  |
| PT3-C...7... | 0.61711  |
| PT3-C...8... | -0.40998 |
| PT3-C...9... | 0.15071  |
| PT3-F...2... | 1.63292  |
| PT3-F...3... | -0.57219 |
| PT3-F...4... | 0.0839   |
| PT3-H...1... | 0.35264  |
| PT3-H...2... | -0.18406 |
| PT3-H...3... | -0.02848 |
| PT3-H...4... | 0.21985  |
| PT3-H...5... | 0.78613  |
| PT3-H...6... | 0.91515  |
| PT3-H...7... | 0        |
| PT3-H...8... | -0.30656 |
| PT3-H...9... | -0.97917 |
| PT3-Cl..2... | 0.24842  |
| PT3-Cl..3... | 0        |
| PT3-Cl..5... | -0.2203  |
| PT3-N...1... | -0.60806 |
| PT3-N...3... | 1.01546  |
| PT3-N...4... | 0.50146  |

|              |          |
|--------------|----------|
| PT3-N...6... | 0        |
| PT3-N...9... | 0        |
| PT3-O...1... | 0.02166  |
| PT3-O...2... | 0.30968  |
| PT3-O...3... | -0.83572 |
| PT3-O...4... | -0.78257 |
| PT3-O...5... | 1.33997  |
| PT3-O...6... | 1.06223  |
| PT3-O...8... | 0.76812  |
| VS2-C...10.. | -0.43648 |
| VS2-C...11.. | -0.35674 |
| VS2-C...12.. | -0.83302 |
| VS2-C...13.. | -1.24723 |
| VS2-C...14.. | -0.14017 |
| VS2-C...15.. | 0.58225  |
| VS2-C...16.. | 0.79646  |
| VS2-C...17.. | 0.70929  |
| VS2-C...2... | 1.42378  |
| VS2-C...18.. | -0.10524 |
| VS2-C...19.. | 0.68058  |
| VS2-C...20.. | 0.41413  |
| VS2-C...21.. | -0.49114 |
| VS2-C...22.. | 0        |
| VS2-C...23.. | -1.3638  |
| VS2-C...27.. | -0.93697 |
| VS2-C...28.. | 0.07915  |
| VS2-C...3... | -1.37445 |
| VS2-C...4... | 0.40345  |
| VS2-C...5... | -0.04538 |
| VS2-C...6... | 0.31818  |

|              |          |
|--------------|----------|
| VS2-C...7... | 0.37202  |
| VS2-C...8... | 0.31826  |
| VS2-C...9... | 0.27267  |
| VS2-F...3... | 1.91767  |
| VS2-F...4... | -0.57313 |
| VS2-F...5... | 0.42162  |
| VS2-F...6... | 0.33436  |
| VS2-F...7... | 0.5498   |
| VS2-H...10.. | 0        |
| VS2-H...11.. | -0.91064 |
| VS2-H...12.. | -0.48648 |
| VS2-H...2... | -0.62063 |
| VS2-H...3... | 0.91885  |
| VS2-H...4... | -0.43643 |
| VS2-H...5... | 0.27378  |
| VS2-H...6... | 0.03008  |
| VS2-H...7... | -0.16083 |
| VS2-H...8... | -0.36329 |
| VS2-H...9... | -0.30597 |
| VS2-Cl..10.. | 0.31458  |
| VS2-Cl..4... | -0.43813 |
| VS2-Cl..5... | -0.77851 |
| VS2-Cl..6... | 0        |
| VS2-Cl..7... | -0.49815 |
| VS2-Cl..8... | 1.78288  |
| VS2-N...11.. | 0        |
| VS2-N...12.. | 0        |
| VS2-N...14.. | 0        |
| VS2-N...17.. | 0        |
| VS2-N...2... | 1.80564  |



|              |          |
|--------------|----------|
| VS2-N...5... | 0        |
| VS2-N...6... | 0.28182  |
| VS2-N...8... | 0        |
| VS2-N...9... | 1.41684  |
| VS2-O...10.. | 0        |
| VS2-O...11.. | -0.60684 |
| VS2-O...2... | -1.27354 |
| VS2-O...3... | 0.68545  |
| VS2-O...4... | 1.66708  |
| VS2-O...5... | 0.40712  |
| VS2-O...6... | 1.39731  |
| VS2-O...7... | 2.00678  |
| VS2-O...8... | 0.24444  |
| VS2-O...9... | -1.04225 |
| \...(C...    | 0        |
| \...(O...    | 0        |
| \...C...(    | -0.33483 |
| \...C...=... | 0.77123  |
| \...C...C... | -0.86619 |
| \...C...Cl.. | 0        |
| \...c...1... | -3.01956 |
| [CH2].....   | 0        |
| [C].....     | 0        |
| [T10].....   | -0.2288  |
| [T13].....   | 0.34313  |
| [T14].....   | 0        |
| [T15].....   | 0        |
| [T17].....   | 2.29839  |
| [T18].....   | 1.07112  |
| [T19].....   | 1.19686  |

|              |          |
|--------------|----------|
| [T20].....   | 0        |
| [T21].....   | 0        |
| [T22].....   | 1.51088  |
| [T23].....   | 0        |
| [T24].....   | 1.72016  |
| [T25].....   | 2.34963  |
| [T26].....   | 2.08624  |
| [T27].....   | 2.41887  |
| [T28].....   | 0        |
| [T29].....   | 0        |
| [T30].....   | 2.96535  |
| [T31].....   | 0        |
| [T32].....   | 0        |
| [T34].....   | 2.83907  |
| [T35].....   | 0        |
| [T36].....   | 1.90333  |
| [T37].....   | 2.38554  |
| [T38].....   | 0.62591  |
| [T40].....   | 1.54506  |
| [T0].....    | -4.51369 |
| [T43].....   | 0        |
| [T47].....   | 0        |
| [T1].....    | 0        |
| [T2].....    | 0        |
| [T3].....    | -3.22736 |
| [T6].....    | 0        |
| [nH].....    | 0        |
| c...(O...    | -0.20163 |
| c...1..O...  | 0        |
| c...1...c... | -1.22414 |

|              |          |
|--------------|----------|
| c...2...c... | 0.34336  |
| c...C...=... | -1.8247  |
| c...C...Cl.. | -1.09234 |
| c...\...C... | -2.93434 |
| c...c...(... | -0.27587 |
| c...c...1... | 2.94186  |
| c...c...2... | -0.0355  |
| c...c...c... | 0.39071  |
| c...n...1... | 0        |
| n...c...c... | 0        |
| o...1...c... | 0        |
